# Supplementary material for: Gene-associated methylation status of ST14 as a predictor of survival and hormone receptor positivity in breast Cancer
Source: BMC Cancer. 2021 Aug 21;21:945. doi: 10.1186/s12885-021-08645-3 (PMC8380334; doi:10.1186/s12885-021-08645-3)
Supplement: Supplementary file 11 — Additional file 11. DEGs between high and low GAM groups. [file 12885_2021_8645_MOESM11_ESM.csv]

	baseMean	log2FoldChange	lfcSE	stat	pvalue	log10Pval	padj
LOC643719	22.27429864	-3.208598003	0.245517699	-13.06870345	4.97E-39	3.83E+01	9.8E-35
COL2A1	1173.778613	4.511877141	0.386970003	11.65950101	2.05E-31	3.07E+01	2.02E-27
SLIT1	45.53364649	3.215381782	0.286841231	11.20962201	3.66E-29	2.84E+01	2.4E-25
C4orf7	676.0309462	4.919154457	0.441488223	11.14220993	7.82E-29	2.81E+01	3.85E-25
PCSK1	249.2299869	3.722718665	0.338617428	10.99387791	4.09E-28	2.74E+01	1.61E-24
GFAP	11.48574468	2.547262129	0.261179212	9.752928323	1.79E-22	2.17E+01	5.89E-19
ENPP3	45.38389582	-2.139567655	0.219883555	-9.730457826	2.24E-22	2.17E+01	6.3E-19
SOX8	57.85283321	2.52161892	0.260780646	9.669501772	4.06E-22	2.14E+01	8.9E-19
ALDH3A1	23.85946954	3.42979947	0.354671082	9.670366849	4.03E-22	2.14E+01	8.9E-19
PTPRZ1	107.0177071	3.269293811	0.339830878	9.62035537	6.56E-22	2.12E+01	1.29E-18
SEZ6L	51.12453591	3.088756757	0.327373517	9.434962201	3.91E-21	2.04E+01	7.01E-18
WIF1	37.51583825	3.958714844	0.425065224	9.313193891	1.24E-20	1.99E+01	2.04E-17
ASCL1	87.87738968	4.432193761	0.481267149	9.2094251	3.28E-20	1.95E+01	4.97E-17
ROPN1B	53.37392946	3.143640777	0.342039821	9.190861955	3.9E-20	1.94E+01	5.49E-17
ROS1	7.818225533	-3.060257678	0.340443611	-8.989029539	2.49E-19	1.86E+01	3.13E-16
GPR115	19.16907919	-2.519079079	0.280300781	-8.987056934	2.54E-19	1.86E+01	3.13E-16
SLC7A3	8.628174899	3.00780779	0.343750774	8.749966598	2.13E-18	1.77E+01	2.47E-15
CAPN6	192.0501119	2.614619526	0.299825802	8.72046204	2.77E-18	1.76E+01	3.03E-15
GABRP	2992.503632	2.860008366	0.332136556	8.610941226	7.25E-18	1.71E+01	7.46E-15
PHF21B	26.33297826	3.025899398	0.351677009	8.60420022	7.69E-18	1.71E+01	7.46E-15
DLK1	14.31739336	4.907320641	0.570595861	8.600343922	7.95E-18	1.71E+01	7.46E-15
SOX10	523.8371428	3.075604557	0.359314938	8.559634557	1.13E-17	1.69E+01	9.81E-15
ROPN1	44.60662346	3.296514436	0.385178822	8.558400015	1.14E-17	1.69E+01	9.81E-15
CHGA	34.8921304	4.525372683	0.545882205	8.290016857	1.13E-16	1.59E+01	9.3E-14
EDN3	25.10806196	2.975845618	0.363839748	8.179000884	2.86E-16	1.55E+01	2.26E-13
MSLN	126.7589446	3.165848623	0.391876083	8.078698233	6.55E-16	1.52E+01	4.96E-13
SLC4A10	21.47224289	2.739365335	0.341296577	8.026348704	1E-15	1.5E+01	7.33E-13
KIAA1045	15.55461084	1.940674382	0.242416634	8.005533079	1.19E-15	1.49E+01	8.08E-13
CHRNB2	62.78390506	2.085975497	0.260522528	8.006891049	1.18E-15	1.49E+01	8.08E-13
NCRNA00092	6.776484239	2.674378593	0.335978908	7.959959774	1.72E-15	1.48E+01	1.09E-12
CPLX2	35.12900848	5.484102832	0.688915264	7.960489658	1.71E-15	1.48E+01	1.09E-12
LOC100124692	15.46822187	2.809834226	0.354240357	7.931999203	2.16E-15	1.47E+01	1.33E-12
CLDN6	9.657194591	3.214135488	0.406627752	7.904368232	2.69E-15	1.46E+01	1.61E-12
?|729884	21.81768871	-2.32202674	0.295933264	-7.846453985	4.28E-15	1.44E+01	2.28E-12
ABCC2	39.31171776	-2.022461002	0.257717672	-7.847583697	4.24E-15	1.44E+01	2.28E-12
SYNM	1387.562255	1.538474411	0.195938588	7.851819403	4.1E-15	1.44E+01	2.28E-12
KCNJ16	10.22838314	2.5762459	0.328055725	7.853074038	4.06E-15	1.44E+01	2.28E-12
DCD	325.7806249	-5.971666232	0.761418386	-7.842818534	4.41E-15	1.44E+01	2.29E-12
SCRG1	32.9982525	2.708079874	0.346821199	7.808288197	5.8E-15	1.42E+01	2.93E-12
NCAN	17.44619676	4.010871185	0.514739078	7.792047189	6.59E-15	1.42E+01	3.18E-12
CSN3	22.04060612	7.095053764	0.91059718	7.791649175	6.61E-15	1.42E+01	3.18E-12
HAAO	75.85337859	-1.156326751	0.148786012	-7.771743711	7.74E-15	1.41E+01	3.63E-12
TUBB2B	85.47217841	1.916557797	0.24697576	7.76010487	8.49E-15	1.41E+01	3.89E-12
LOC100131551	7.59606224	-1.510673787	0.196325499	-7.694740586	1.42E-14	1.38E+01	6.35E-12
COL9A1	7.16532218	3.36803116	0.43920848	7.668411049	1.74E-14	1.38E+01	7.63E-12
DLK2	12.18865741	1.55594821	0.20319231	7.657515233	1.9E-14	1.37E+01	8.12E-12
TMEM45A	844.2190317	-1.282646749	0.16777541	-7.645022283	2.09E-14	1.37E+01	8.76E-12
HRCT1	49.26017821	1.90528292	0.249450552	7.637918247	2.21E-14	1.37E+01	9.07E-12
MGAT3	105.3121611	1.274610175	0.167371994	7.615432799	2.63E-14	1.36E+01	1.06E-11
DCX	49.39547157	2.560204394	0.336412757	7.610307106	2.73E-14	1.36E+01	1.08E-11
FAM150B	7.815694388	2.72561503	0.359218544	7.58762339	3.26E-14	1.35E+01	1.26E-11
PLP1	43.8217994	1.879304844	0.248499692	7.562604321	3.95E-14	1.34E+01	1.5E-11
TRPM6	13.62820469	1.74975561	0.232291963	7.532570593	4.98E-14	1.33E+01	1.85E-11
SNAP25	43.69510632	1.941413846	0.258304419	7.515991612	5.65E-14	1.32E+01	2.06E-11
SLC38A4	25.45628378	-1.546783696	0.20714594	-7.467120521	8.2E-14	1.31E+01	2.94E-11
PRSS33	11.74744019	5.491684461	0.736415559	7.457317264	8.83E-14	1.31E+01	3.11E-11
EGLN3	1039.042379	-1.20633179	0.161946965	-7.448931129	9.41E-14	1.3E+01	3.25E-11
AKR1D1	3.631959653	-2.63374792	0.353854413	-7.443026922	9.84E-14	1.3E+01	3.34E-11
MMRN1	133.6762507	1.55888426	0.210265242	7.413894208	1.23E-13	1.29E+01	4.1E-11
COL11A2	26.96233532	1.930395051	0.260638918	7.406396037	1.3E-13	1.29E+01	4.26E-11
IRS4	7.346312023	4.044214533	0.549129534	7.364773308	1.77E-13	1.28E+01	5.73E-11
C2orf40	53.67445588	1.994968255	0.271455992	7.349140608	1.99E-13	1.27E+01	6.34E-11
REC8	88.04606691	1.512699144	0.206047837	7.34149489	2.11E-13	1.27E+01	6.5E-11
RUNDC3A	35.71880714	2.054584071	0.279820692	7.342502278	2.1E-13	1.27E+01	6.5E-11
NTRK3	134.2785974	1.929962373	0.26398096	7.310990822	2.65E-13	1.26E+01	8.04E-11
IYD	76.59245699	-2.22313616	0.306582243	-7.251353312	4.13E-13	1.24E+01	1.23E-10
DPY19L2	30.30379408	1.216320666	0.168119958	7.234838017	4.66E-13	1.23E+01	1.37E-10
ART3	38.4493347	3.027720626	0.42071637	7.196583834	6.17E-13	1.22E+01	1.79E-10
ANK1	69.25901809	1.794827505	0.25018948	7.173872808	7.29E-13	1.21E+01	2.08E-10
COBLL1	887.2210206	-0.739528709	0.103552883	-7.141555932	9.23E-13	1.2E+01	2.56E-10
TTYH1	97.62993783	2.022274374	0.283113964	7.142969383	9.13E-13	1.2E+01	2.56E-10
HECW1	10.01666756	-1.336221111	0.187686657	-7.119425192	1.08E-12	1.2E+01	2.97E-10
HLF	164.6891957	1.315134878	0.185211613	7.100715001	1.24E-12	1.19E+01	3.35E-10
LEFTY2	14.69697714	1.970602955	0.277905438	7.090911813	1.33E-12	1.19E+01	3.55E-10
KCNC1	22.89815807	2.10813782	0.299011524	7.050356432	1.78E-12	1.17E+01	4.69E-10
CMTM5	3.408327775	3.380162875	0.480130058	7.040098447	1.92E-12	1.17E+01	4.98E-10
PCDH11X	10.82101978	2.347550862	0.335821594	6.990470258	2.74E-12	1.16E+01	6.92E-10
GPR12	13.30178046	2.518416869	0.360172593	6.992250162	2.71E-12	1.16E+01	6.92E-10
CCL19	365.1467418	1.774418098	0.254251418	6.978989965	2.97E-12	1.15E+01	7.42E-10
COL4A6	174.2506303	-1.788712948	0.256767463	-6.966275744	3.25E-12	1.15E+01	8.02E-10
DES	39.15102632	1.838487418	0.264121592	6.960761521	3.38E-12	1.15E+01	8.24E-10
SYP	99.81002187	1.449965627	0.208998495	6.937684525	3.99E-12	1.14E+01	9.58E-10
GABBR2	35.08765113	3.000588032	0.432826168	6.932547652	4.13E-12	1.14E+01	9.82E-10
MEOX1	93.22486547	1.405760211	0.203032503	6.923818558	4.4E-12	1.14E+01	1.03E-09
C12orf69	17.93315737	1.58759029	0.22949262	6.917827195	4.59E-12	1.13E+01	1.05E-09
MSMB	174.3728825	2.262942308	0.327117027	6.917837116	4.59E-12	1.13E+01	1.05E-09
C10orf90	9.586625752	2.054222132	0.297688991	6.900564662	5.18E-12	1.13E+01	1.17E-09
MUCL1	3729.639019	-2.651380169	0.384619431	-6.893515923	5.44E-12	1.13E+01	1.21E-09
DSG1	60.31671359	2.582483967	0.374556303	6.894781769	5.39E-12	1.13E+01	1.21E-09
DRD2	16.26009312	1.759451119	0.255677516	6.881524604	5.92E-12	1.12E+01	1.3E-09
HS3ST4	5.907351118	2.722815286	0.396466706	6.86770224	6.52E-12	1.12E+01	1.41E-09
FAM19A3	12.56657853	1.85542676	0.270311825	6.86402365	6.69E-12	1.12E+01	1.43E-09
RYR3	15.80583898	1.217571625	0.17752589	6.858558052	6.96E-12	1.12E+01	1.47E-09
RNF186	2.643037871	2.697129203	0.393324981	6.857253748	7.02E-12	1.12E+01	1.47E-09
LOC100216001	1.906275921	-1.741263538	0.254439119	-6.843537056	7.73E-12	1.11E+01	1.6E-09
ERO1L	1045.107356	-0.731846621	0.107079204	-6.834628894	8.22E-12	1.11E+01	1.69E-09
FREM1	64.23120529	1.351212169	0.198038449	6.822978946	8.92E-12	1.1E+01	1.81E-09
AP1S3	192.4724782	-0.652090656	0.095949486	-6.796187104	1.07E-11	1.1E+01	2.16E-09
CD300LG	46.48096508	1.806333983	0.266087366	6.788499617	1.13E-11	1.09E+01	2.26E-09
KCNS3	810.0744845	-0.86536104	0.127789422	-6.771773644	1.27E-11	1.09E+01	2.48E-09
NRIP2	68.1103014	0.678788128	0.100220684	6.772934469	1.26E-11	1.09E+01	2.48E-09
AKR1B15	19.74814753	-2.231255225	0.330113397	-6.759056882	1.39E-11	1.09E+01	2.66E-09
DNASE1L3	19.0192609	1.514598865	0.22406754	6.759563946	1.38E-11	1.09E+01	2.66E-09
TSPAN7	245.1600369	0.989769158	0.147042808	6.731163333	1.68E-11	1.08E+01	3.19E-09
PROL1	30.08095447	3.313423898	0.492495372	6.727827476	1.72E-11	1.08E+01	3.23E-09
SPIB	43.63317158	1.740328277	0.258785559	6.724982202	1.76E-11	1.08E+01	3.27E-09
ABCB1	95.27341184	1.066212954	0.15869432	6.718658579	1.83E-11	1.07E+01	3.38E-09
PCSK1N	57.63235224	2.048986029	0.30565719	6.703542715	2.03E-11	1.07E+01	3.71E-09
SPHKAP	7.308567676	2.83992738	0.424322891	6.692845092	2.19E-11	1.07E+01	3.96E-09
CPB1	19534.26178	3.130971982	0.469032719	6.675380744	2.47E-11	1.06E+01	4.42E-09
NRXN1	24.08032541	1.858600874	0.278894038	6.664182891	2.66E-11	1.06E+01	4.73E-09
CCNYL1	471.7175757	-0.47567371	0.071739464	-6.630572362	3.34E-11	1.05E+01	5.84E-09
ACCN1	22.44483735	2.436170556	0.367422531	6.630433223	3.35E-11	1.05E+01	5.84E-09
ITM2A	425.134739	1.014255548	0.153374927	6.612916266	3.77E-11	1.04E+01	6.52E-09
TBX4	5.07315138	1.872603934	0.283430434	6.606926109	3.92E-11	1.04E+01	6.73E-09
FAM83A	138.5269114	-1.902649553	0.289394595	-6.574585656	4.88E-11	1.03E+01	8.29E-09
RAB37	91.41185106	0.85422302	0.130002527	6.570818604	5E-11	1.03E+01	8.43E-09
KLHL13	183.1027775	1.210322314	0.184329607	6.566076585	5.17E-11	1.03E+01	8.56E-09
C2orf82	11.15846362	2.408395484	0.3667856	6.566221483	5.16E-11	1.03E+01	8.56E-09
VTN	17.75691933	1.769803108	0.26973704	6.561216455	5.34E-11	1.03E+01	8.77E-09
NCRNA00160	9.845504795	-1.408612037	0.215165594	-6.546641645	5.88E-11	1.02E+01	9.59E-09
PAEP	6.495922225	-2.441754844	0.373219723	-6.542405695	6.05E-11	1.02E+01	9.78E-09
SYN1	62.85226823	1.414146935	0.216276837	6.538596347	6.21E-11	1.02E+01	9.95E-09
S100A8	694.2504187	-1.999181715	0.305837386	-6.536747321	6.29E-11	1.02E+01	9.99E-09
NPTX2	58.62532484	-1.234156618	0.189074293	-6.52736338	6.69E-11	1.02E+01	1.06E-08
TMEM86A	542.0411802	-0.864687581	0.132632324	-6.519433225	7.06E-11	1.02E+01	1.1E-08
SYN2	37.21728062	1.504313368	0.230997037	6.512262622	7.4E-11	1.01E+01	1.15E-08
HPD	1.386321752	-1.73748244	0.267359814	-6.498667136	8.1E-11	1.01E+01	1.25E-08
USP44	5.799340889	1.24090939	0.191369354	6.484368387	8.91E-11	1.01E+01	1.36E-08
DLGAP3	17.07473065	1.460390728	0.225268721	6.482882842	9E-11	1E+01	1.36E-08
LRRC3B	2.380072495	2.136422347	0.329812439	6.477688822	9.31E-11	1E+01	1.4E-08
P4HA1	1893.631161	-0.592846881	0.091724372	-6.463351768	1.02E-10	9.99E+00	1.53E-08
C2CD4A	116.1372696	-1.976157318	0.305842472	-6.461356751	1.04E-10	9.98E+00	1.54E-08
KBTBD12	5.792365172	2.443040761	0.378570917	6.453323935	1.09E-10	9.96E+00	1.61E-08
CGA	213.6574037	3.309541024	0.514274814	6.435355052	1.23E-10	9.91E+00	1.8E-08
DARC	367.3417303	1.469481331	0.228491469	6.431230615	1.27E-10	9.9E+00	1.83E-08
SLCO1A2	5.002241983	2.530909853	0.394062357	6.422612591	1.34E-10	9.87E+00	1.91E-08
SFTPB	11.80814854	2.719297869	0.423327067	6.423633357	1.33E-10	9.88E+00	1.91E-08
PAPSS2	1252.136459	-1.058719069	0.165082065	-6.413289466	1.42E-10	9.85E+00	2.02E-08
C1orf130	83.64741561	1.541286988	0.240741685	6.402243919	1.53E-10	9.81E+00	2.14E-08
ANGPTL7	5.280104101	2.400541965	0.374945294	6.402379231	1.53E-10	9.82E+00	2.14E-08
SDPR	188.3758365	1.10625645	0.172989172	6.394946204	1.61E-10	9.79E+00	2.23E-08
PI15	642.3797546	1.684602926	0.263784186	6.386292329	1.7E-10	9.77E+00	2.34E-08
RERGL	23.69183076	1.759972627	0.275724275	6.383089146	1.74E-10	9.76E+00	2.38E-08
FGF19	3.915556586	2.271614013	0.356653589	6.36924479	1.9E-10	9.72E+00	2.58E-08
RNF182	26.26016701	1.477921844	0.232413907	6.359007771	2.03E-10	9.69E+00	2.74E-08
CLEC2L	3.484603686	2.081751702	0.327781383	6.351037024	2.14E-10	9.67E+00	2.87E-08
GLT25D2	38.48602775	1.124090904	0.177272967	6.341017036	2.28E-10	9.64E+00	3.04E-08
MMP7	1413.936292	1.541334184	0.243282347	6.335577584	2.36E-10	9.63E+00	3.13E-08
IL1A	4.305044183	-1.135671199	0.179358678	-6.331844181	2.42E-10	9.62E+00	3.16E-08
HUS1B	8.199478152	2.011723996	0.317715654	6.331837832	2.42E-10	9.62E+00	3.16E-08
CLCA2	652.2475407	-2.288775635	0.361662372	-6.328487045	2.48E-10	9.61E+00	3.21E-08
CASQ2	33.09521902	1.156293615	0.182743001	6.327430386	2.49E-10	9.6E+00	3.21E-08
NMNAT2	90.48057066	1.371534656	0.216984761	6.320880105	2.6E-10	9.58E+00	3.33E-08
FIBCD1	70.39907372	-1.81120345	0.287055341	-6.309596766	2.8E-10	9.55E+00	3.56E-08
HMP19	23.27797146	2.171245467	0.344167144	6.308694795	2.81E-10	9.55E+00	3.56E-08
TSPAN8	78.90831986	-2.423386145	0.384666476	-6.299967099	2.98E-10	9.53E+00	3.7E-08
FOXE1	3.481360785	3.007785792	0.477472031	6.299396811	2.99E-10	9.52E+00	3.7E-08
CSMD3	15.14128122	4.142920978	0.657644458	6.299636421	2.98E-10	9.53E+00	3.7E-08
NXPH4	110.6192941	-1.408487584	0.223878563	-6.291301688	3.15E-10	9.5E+00	3.88E-08
TMCC2	72.74407951	1.14133864	0.181733839	6.280275834	3.38E-10	9.47E+00	4.14E-08
CACNG6	20.88497357	2.967427755	0.473327142	6.269295572	3.63E-10	9.44E+00	4.41E-08
PAK7	8.442890909	1.758622602	0.2807681	6.263612568	3.76E-10	9.42E+00	4.55E-08
PTCH2	28.47301567	0.928805058	0.148547812	6.252566402	4.04E-10	9.39E+00	4.85E-08
EPGN	2.231927228	-2.528491621	0.404576364	-6.249726499	4.11E-10	9.39E+00	4.88E-08
PRSS1	9.83326785	3.191767483	0.510654886	6.250341614	4.1E-10	9.39E+00	4.88E-08
CNTN3	67.30632011	-1.1795989	0.188783402	-6.24842486	4.15E-10	9.38E+00	4.89E-08
SCG3	7.532040462	2.162237055	0.346221931	6.245234239	4.23E-10	9.37E+00	4.96E-08
CATSPERB	50.82309075	-1.213245684	0.194470527	-6.23871239	4.41E-10	9.36E+00	5.15E-08
KPNA7	7.312718113	-1.603049298	0.257159519	-6.233676694	4.56E-10	9.34E+00	5.25E-08
C14orf184	5.043805074	-1.135999159	0.18223047	-6.233859553	4.55E-10	9.34E+00	5.25E-08
KCTD14	155.97799	1.319989848	0.212048269	6.224949895	4.82E-10	9.32E+00	5.5E-08
LEP	78.09983164	1.968433956	0.316229857	6.224693559	4.82E-10	9.32E+00	5.5E-08
EN1	218.3828849	1.715239699	0.275720937	6.220926555	4.94E-10	9.31E+00	5.6E-08
CST9	218.1335385	2.754428672	0.444591555	6.195413843	5.81E-10	9.24E+00	6.55E-08
FAM125B	327.3555211	0.442153082	0.071693901	6.1672343	6.95E-10	9.16E+00	7.78E-08
KIT	892.1281225	1.240555909	0.201766272	6.148480111	7.82E-10	9.11E+00	8.71E-08
GDF1	6.912318425	1.891353857	0.307657142	6.147602639	7.87E-10	9.1E+00	8.71E-08
IL8	133.6398943	-1.433775741	0.233532721	-6.139506852	8.28E-10	9.08E+00	9.09E-08
GSTM5	89.01419471	1.443637088	0.235158243	6.139002704	8.3E-10	9.08E+00	9.09E-08
ZDHHC22	6.923582685	2.73543528	0.446008103	6.133151527	8.62E-10	9.06E+00	9.38E-08
ENHO	105.4721277	1.413146156	0.230913753	6.119800747	9.37E-10	9.03E+00	1.01E-07
SLC25A25	542.3525051	0.516177823	0.084430123	6.113668934	9.74E-10	9.01E+00	1.05E-07
PRRT4	12.00263299	1.327516332	0.217212189	6.111610659	9.86E-10	9.01E+00	1.05E-07
ITIH2	8.926137202	2.276437689	0.372393265	6.112993713	9.78E-10	9.01E+00	1.05E-07
NPY2R	9.519060188	3.163630981	0.518237083	6.104601703	1.03E-09	8.99E+00	1.09E-07
NRXN2	69.59196024	0.91846213	0.150531268	6.101470753	1.05E-09	8.98E+00	1.11E-07
KCNA1	11.75305453	1.426669156	0.234152626	6.092902664	1.11E-09	8.96E+00	1.16E-07
C6orf105	44.03464048	-1.210408725	0.19886213	-6.086672834	1.15E-09	8.94E+00	1.2E-07
RAB3C	5.243834934	1.753451121	0.288203271	6.084077804	1.17E-09	8.93E+00	1.22E-07
LOC55908	1.375020915	2.129309534	0.350468615	6.075606889	1.24E-09	8.91E+00	1.27E-07
SYNGR4	4.077415058	-1.216801264	0.200874155	-6.057530232	1.38E-09	8.86E+00	1.41E-07
UNC13A	44.63105107	1.448118917	0.239027117	6.058387579	1.37E-09	8.86E+00	1.41E-07
SRD5A1	408.6998915	-0.830234819	0.137190266	-6.051703536	1.43E-09	8.84E+00	1.46E-07
FCGRT	2485.819939	0.684795998	0.113356475	6.041084097	1.53E-09	8.82E+00	1.55E-07
C7orf68	709.349581	-0.711494672	0.118064057	-6.026344444	1.68E-09	8.78E+00	1.69E-07
G6PD	1465.941987	-0.64079157	0.106470375	-6.018496397	1.76E-09	8.75E+00	1.76E-07
EDAR	5.589715022	1.782709192	0.296511536	6.012276006	1.83E-09	8.74E+00	1.82E-07
KCNK3	101.8631771	1.61823009	0.26954734	6.003509766	1.93E-09	8.71E+00	1.91E-07
KRT14	2022.429142	1.796051089	0.299185406	6.003137358	1.94E-09	8.71E+00	1.91E-07
GAD1	51.96876988	-1.962237933	0.327151891	-5.997941584	2E-09	8.7E+00	1.96E-07
LOC284578	7.501303403	1.810364855	0.301908281	5.996406746	2.02E-09	8.7E+00	1.97E-07
RELN	46.29132809	1.53731698	0.256440634	5.99482601	2.04E-09	8.69E+00	1.98E-07
GLYATL2	536.7321161	-1.86489504	0.311300046	-5.990667412	2.09E-09	8.68E+00	2.02E-07
EPO	15.44642549	-2.124189747	0.354791129	-5.987155749	2.14E-09	8.67E+00	2.04E-07
CAST	4869.539271	-0.396672064	0.066246158	-5.98785011	2.13E-09	8.67E+00	2.04E-07
OSR1	123.6841953	1.436979164	0.240088438	5.985207676	2.16E-09	8.67E+00	2.06E-07
FAM181B	13.28665162	1.704918124	0.285010666	5.981944981	2.2E-09	8.66E+00	2.08E-07
TAC1	8.555899121	1.910165597	0.319338224	5.981637817	2.21E-09	8.66E+00	2.08E-07
ITGA9	181.0429354	0.778791774	0.130240629	5.979637706	2.24E-09	8.65E+00	2.09E-07
PTPRQ	12.96629663	2.071600857	0.346512551	5.978429504	2.25E-09	8.65E+00	2.09E-07
DLX6	7.821224281	2.495932304	0.417329656	5.980721167	2.22E-09	8.65E+00	2.09E-07
EPHB1	71.43558846	1.137978423	0.190553813	5.971953027	2.34E-09	8.63E+00	2.17E-07
EFNB3	133.3418182	0.98555865	0.165398652	5.958686105	2.54E-09	8.59E+00	2.34E-07
POU4F3	1.35153983	-1.518347554	0.255205877	-5.949500741	2.69E-09	8.57E+00	2.47E-07
NMUR1	10.37971489	1.05656782	0.177787088	5.942882761	2.8E-09	8.55E+00	2.56E-07
AWAT2	2.397821614	-2.565687502	0.43272045	-5.929203258	3.04E-09	8.52E+00	2.76E-07
AQP4	12.52887725	1.453965129	0.245330017	5.926568407	3.09E-09	8.51E+00	2.8E-07
NTS	21.63019755	2.913205257	0.491700412	5.924756592	3.13E-09	8.5E+00	2.81E-07
ADCYAP1	30.9965161	1.579208059	0.266801839	5.919029881	3.24E-09	8.49E+00	2.9E-07
PFKFB2	649.1330557	-0.617044195	0.104451665	-5.907461531	3.47E-09	8.46E+00	3.08E-07
ANXA2P2	4485.557465	-0.441414985	0.074705985	-5.908696441	3.45E-09	8.46E+00	3.08E-07
PEX5L	33.62639018	1.75421473	0.297177809	5.902912934	3.57E-09	8.45E+00	3.16E-07
CYP27B1	77.88635715	-0.992453861	0.168599642	-5.886452975	3.95E-09	8.4E+00	3.46E-07
LMO7	916.2025711	-0.598937091	0.101748785	-5.886429894	3.95E-09	8.4E+00	3.46E-07
GUCY1A2	56.05858218	-0.938708703	0.159552549	-5.883382674	4.02E-09	8.4E+00	3.51E-07
VGLL1	153.5760031	2.381060059	0.404885715	5.880820115	4.08E-09	8.39E+00	3.54E-07
CPA4	124.0211155	-1.577306747	0.268410825	-5.876464727	4.19E-09	8.38E+00	3.62E-07
TTC1	1026.28672	-0.281664312	0.047992336	-5.868943525	4.39E-09	8.36E+00	3.77E-07
TMEM132E	16.39678922	1.306944288	0.222752918	5.867237557	4.43E-09	8.35E+00	3.8E-07
BMX	18.94887224	1.150184437	0.196118793	5.864733405	4.5E-09	8.35E+00	3.84E-07
KIAA1199	522.2087713	-1.08843132	0.186143308	-5.847276109	5E-09	8.3E+00	4.25E-07
CFP	24.42435314	1.005162418	0.172026522	5.843066575	5.12E-09	8.29E+00	4.33E-07
DLX6AS	2.593998494	3.285697312	0.562369605	5.842594055	5.14E-09	8.29E+00	4.33E-07
CRTAC1	45.197426	1.50710012	0.258110373	5.838975415	5.25E-09	8.28E+00	4.41E-07
TGFBI	3791.684264	-0.727768166	0.124827622	-5.830185291	5.54E-09	8.26E+00	4.62E-07
IGDCC3	55.29306307	1.835039177	0.314781756	5.829560144	5.56E-09	8.26E+00	4.62E-07
CCNA1	18.37130946	-1.325826994	0.227637414	-5.824292994	5.74E-09	8.24E+00	4.73E-07
LRRN4	8.055238914	1.776814624	0.305058966	5.82449566	5.73E-09	8.24E+00	4.73E-07
NPTX1	25.6422299	1.322170105	0.227233869	5.818543294	5.94E-09	8.23E+00	4.88E-07
IL33	263.1498479	1.201171208	0.206582591	5.814484182	6.08E-09	8.22E+00	4.97E-07
KCNIP1	4.627601319	1.228074264	0.211432081	5.808362948	6.31E-09	8.2E+00	5.14E-07
SLC8A2	20.30007202	1.592577524	0.274674495	5.79805388	6.71E-09	8.17E+00	5.44E-07
SCARA5	58.04458555	1.604792165	0.276929463	5.794949193	6.83E-09	8.17E+00	5.52E-07
S100B	127.1281911	1.386253643	0.240584443	5.762025274	8.31E-09	8.08E+00	6.69E-07
SRL	15.86132751	0.803727822	0.139787477	5.749641104	8.94E-09	8.05E+00	7.17E-07
TMEM100	36.45732745	1.093317886	0.190234874	5.747200087	9.07E-09	8.04E+00	7.24E-07
DNAH3	16.27312166	-1.784919012	0.310773353	-5.743475091	9.28E-09	8.03E+00	7.37E-07
ARSJ	122.5756792	-0.807948965	0.140761889	-5.739827512	9.48E-09	8.02E+00	7.49E-07
AMBP	29.44365349	1.584847447	0.276138801	5.739314577	9.51E-09	8.02E+00	7.49E-07
C20orf112	1320.005342	0.406091882	0.070765452	5.738561256	9.55E-09	8.02E+00	7.5E-07
GCET2	46.38125381	0.765219914	0.13341921	5.735455295	9.73E-09	8.01E+00	7.61E-07
HHIPL2	49.84775636	-1.554594997	0.271315502	-5.729842144	1.01E-08	8E+00	7.82E-07
TFPI2	258.3212903	1.647165711	0.287496299	5.729345791	1.01E-08	8E+00	7.82E-07
S100A7A	84.75923653	-3.309474272	0.579308622	-5.712799955	1.11E-08	7.95E+00	8.59E-07
MPV17L	301.6001625	-1.07904023	0.188986157	-5.70962576	1.13E-08	7.95E+00	8.68E-07
LTB	133.2786314	1.265339332	0.221609494	5.709770425	1.13E-08	7.95E+00	8.68E-07
MAPK4	61.55633854	1.982009094	0.347540368	5.702960792	1.18E-08	7.93E+00	9E-07
GPR44	7.319732355	1.042473898	0.182900581	5.699675156	1.2E-08	7.92E+00	9.13E-07
GPR37L1	21.79224502	1.320160756	0.231650552	5.698932053	1.21E-08	7.92E+00	9.14E-07
AMMECR1	503.0701527	-0.513363991	0.090246263	-5.68847919	1.28E-08	7.89E+00	9.68E-07
COL11A1	5259.582217	-1.159517401	0.203959841	-5.685027978	1.31E-08	7.88E+00	9.8E-07
SHC4	146.3930493	1.598058484	0.281077903	5.685464661	1.3E-08	7.88E+00	9.8E-07
RGS7	6.195580392	1.764287498	0.310394318	5.684019962	1.32E-08	7.88E+00	9.82E-07
TCL1A	23.0974738	1.798272455	0.316669809	5.678698762	1.36E-08	7.87E+00	1.01E-06
GPR87	49.49672512	-1.417989655	0.249788613	-5.676758594	1.37E-08	7.86E+00	1.02E-06
CACHD1	303.4982307	0.700587634	0.123466935	5.674293568	1.39E-08	7.86E+00	1.03E-06
TNFRSF10B	823.745722	-0.46097732	0.081307809	-5.669533149	1.43E-08	7.84E+00	1.05E-06
LCN10	5.853065203	1.2603223	0.222347152	5.668263731	1.44E-08	7.84E+00	1.05E-06
FIGF	23.29845633	1.511662647	0.266630239	5.669509408	1.43E-08	7.84E+00	1.05E-06
MYT1	82.35790709	1.732322007	0.30562561	5.668117963	1.44E-08	7.84E+00	1.05E-06
ESM1	254.3898846	-0.787898523	0.139073478	-5.665339894	1.47E-08	7.83E+00	1.06E-06
ALPK2	63.47416138	-0.924571228	0.163320146	-5.661097247	1.5E-08	7.82E+00	1.09E-06
EPB41	1429.459952	0.405281263	0.071684039	5.653716913	1.57E-08	7.8E+00	1.13E-06
CNR1	46.72875046	1.259238201	0.222798251	5.65192138	1.59E-08	7.8E+00	1.14E-06
FMO2	466.7119634	1.192271789	0.211122608	5.647295655	1.63E-08	7.79E+00	1.16E-06
SC5DL	1189.133647	-0.565075466	0.100078887	-5.64630047	1.64E-08	7.79E+00	1.17E-06
PARD6B	1222.489674	0.969172361	0.171747933	5.642992866	1.67E-08	7.78E+00	1.18E-06
GJB7	3.522282477	2.480143097	0.439855716	5.638537843	1.72E-08	7.77E+00	1.21E-06
KYNU	476.0277234	-1.269187105	0.225182565	-5.636258322	1.74E-08	7.76E+00	1.22E-06
RGS9	45.75220389	1.316204374	0.23360325	5.634358138	1.76E-08	7.76E+00	1.23E-06
NR4A1	1431.506814	0.938784997	0.166762414	5.629475936	1.81E-08	7.74E+00	1.26E-06
ANXA2	13961.44373	-0.428741425	0.076347025	-5.615692647	1.96E-08	7.71E+00	1.36E-06
PTX3	75.85809108	1.431795304	0.255202856	5.610420384	2.02E-08	7.7E+00	1.4E-06
SLITRK1	6.957307206	2.739663972	0.48826032	5.61107233	2.01E-08	7.7E+00	1.4E-06
SLC26A11	423.2376827	0.436551264	0.077843511	5.608062382	2.05E-08	7.69E+00	1.41E-06
FAIM2	180.4343755	-1.367492665	0.244336382	-5.596762347	2.18E-08	7.66E+00	1.5E-06
ZDHHC8P1	32.10830613	0.891460787	0.159578265	5.586354679	2.32E-08	7.63E+00	1.59E-06
ALOX15B	502.6774025	-1.53184442	0.274286128	-5.584841024	2.34E-08	7.63E+00	1.6E-06
PRSS3	7.971665052	2.079276794	0.372599107	5.580466392	2.4E-08	7.62E+00	1.63E-06
GRRP1	28.06002569	0.777344203	0.139380291	5.577145774	2.44E-08	7.61E+00	1.65E-06
CCL14	235.4505784	1.089244649	0.195295698	5.577412411	2.44E-08	7.61E+00	1.65E-06
CYTSB	540.710577	-0.593327944	0.106587199	-5.566596619	2.6E-08	7.59E+00	1.75E-06
HRC	19.9419716	0.936550997	0.16834581	5.563256958	2.65E-08	7.58E+00	1.78E-06
ANO1	3134.515732	0.791186104	0.142310418	5.559579633	2.7E-08	7.57E+00	1.81E-06
PKDCC	124.5878471	0.727575078	0.130951989	5.556044512	2.76E-08	7.56E+00	1.83E-06
GDF9	41.24922947	1.102488629	0.19842634	5.556160673	2.76E-08	7.56E+00	1.83E-06
ETV3L	9.943801036	0.980756658	0.176553954	5.554996845	2.78E-08	7.56E+00	1.84E-06
TREM1	58.13509512	-1.008395087	0.181739759	-5.548566217	2.88E-08	7.54E+00	1.9E-06
DUSP26	3.898088559	1.41954572	0.255851971	5.548308706	2.88E-08	7.54E+00	1.9E-06
COL4A5	1095.480736	-0.923659612	0.16655751	-5.545589701	2.93E-08	7.53E+00	1.91E-06
CSAG3	13.16739153	2.390607433	0.43105596	5.545932904	2.92E-08	7.53E+00	1.91E-06
FAM107A	219.3658023	1.273103461	0.229747458	5.541316846	3E-08	7.52E+00	1.95E-06
UPK1B	7.510781205	4.05492357	0.732453405	5.536083994	3.09E-08	7.51E+00	2.01E-06
LIMCH1	1711.83976	-0.694774639	0.125966408	-5.515554891	3.48E-08	7.46E+00	2.25E-06
MIA	161.4260262	1.786135889	0.323945586	5.513691091	3.51E-08	7.45E+00	2.26E-06
SELP	158.0763354	1.156865928	0.2100193	5.508379116	3.62E-08	7.44E+00	2.33E-06
MITF	334.9467748	-0.565546125	0.102701504	-5.506697581	3.66E-08	7.44E+00	2.34E-06
POMC	8.718030693	1.073774833	0.195008259	5.506304391	3.66E-08	7.44E+00	2.34E-06
GGCT	2361.773366	-0.499171228	0.090704684	-5.503257461	3.73E-08	7.43E+00	2.37E-06
RBP7	211.7041112	0.8431069	0.153295455	5.499881918	3.8E-08	7.42E+00	2.41E-06
ATP6V1D	1344.929053	-0.321716311	0.058523531	-5.497212873	3.86E-08	7.41E+00	2.44E-06
NUDT8	97.64514142	-0.988095702	0.17999551	-5.489557517	4.03E-08	7.39E+00	2.54E-06
GAS2L2	9.119825592	-1.393490598	0.254096964	-5.484089917	4.16E-08	7.38E+00	2.61E-06
LRRC4	64.21502616	-0.665299088	0.121473206	-5.476920476	4.33E-08	7.36E+00	2.71E-06
TXNDC17	720.8455536	-0.386266384	0.07058323	-5.472495158	4.44E-08	7.35E+00	2.77E-06
FHOD1	566.7351108	-0.410668333	0.075106622	-5.467804627	4.56E-08	7.34E+00	2.82E-06
ANKLE1	15.86670091	1.097587566	0.200706421	5.468622079	4.54E-08	7.34E+00	2.82E-06
CCR7	140.9637226	1.06346135	0.194673346	5.462798954	4.69E-08	7.33E+00	2.9E-06
PCDH8	6.8379174	2.177667147	0.399489196	5.451129017	5.01E-08	7.3E+00	3.08E-06
PSD2	8.521061915	1.063449034	0.195123331	5.450137747	5.03E-08	7.3E+00	3.09E-06
ART4	4.148030329	1.566008934	0.287758309	5.44209806	5.27E-08	7.28E+00	3.22E-06
PROX1	15.63192647	1.213645387	0.223377669	5.433154494	5.54E-08	7.26E+00	3.38E-06
DBX2	4.761259956	1.152211895	0.212117286	5.431956621	5.57E-08	7.25E+00	3.39E-06
SRD5A3	1012.837448	-0.502066301	0.092484439	-5.428657047	5.68E-08	7.25E+00	3.41E-06
ABCA5	332.551027	0.634413729	0.116848463	5.429371599	5.66E-08	7.25E+00	3.41E-06
SLC27A6	63.4239111	1.470738183	0.270886577	5.429350545	5.66E-08	7.25E+00	3.41E-06
IL12RB2	88.93914431	1.528693278	0.281508894	5.430355165	5.62E-08	7.25E+00	3.41E-06
C17orf37	1664.835263	-0.902875195	0.16661338	-5.418983732	5.99E-08	7.22E+00	3.59E-06
ZNF474	10.35206071	-0.851612985	0.15720149	-5.417334047	6.05E-08	7.22E+00	3.61E-06
ACE2	30.10404427	-1.833505838	0.338542704	-5.415877567	6.1E-08	7.21E+00	3.63E-06
DPY19L2P4	30.7481161	1.704643871	0.314896522	5.413346138	6.19E-08	7.21E+00	3.67E-06
FAM123C	6.560011693	3.770945554	0.697317903	5.407785374	6.38E-08	7.2E+00	3.78E-06
HOXA10	136.8541379	-0.918941911	0.170145745	-5.400910331	6.63E-08	7.18E+00	3.91E-06
B3GALT1	1.890165053	1.514499007	0.280463186	5.399992156	6.66E-08	7.18E+00	3.92E-06
ANXA2P1	71.47147874	-0.44921822	0.083227222	-5.397491447	6.76E-08	7.17E+00	3.96E-06
GRIA1	15.82656756	1.906106488	0.353247982	5.395944453	6.82E-08	7.17E+00	3.99E-06
CSGALNACT1	310.7997844	-0.60835306	0.112766037	-5.394825197	6.86E-08	7.16E+00	4E-06
DSG4	0.663269759	-1.755691756	0.325525479	-5.393408101	6.91E-08	7.16E+00	4.02E-06
CHST9	62.40369877	1.458555933	0.270702958	5.388031016	7.12E-08	7.15E+00	4.13E-06
CYYR1	436.4531586	0.687958601	0.127712054	5.386794567	7.17E-08	7.14E+00	4.15E-06
MBOAT1	1106.404736	0.623474799	0.115982685	5.375585152	7.63E-08	7.12E+00	4.4E-06
ELL2	1410.273694	-0.552095074	0.102992358	-5.360544066	8.3E-08	7.08E+00	4.75E-06
FUT1	160.0951407	0.606151445	0.11308378	5.360197961	8.31E-08	7.08E+00	4.75E-06
ID4	422.2397403	1.099981141	0.20517762	5.361116597	8.27E-08	7.08E+00	4.75E-06
PPM1K	325.9273825	0.816445684	0.152501043	5.353705576	8.62E-08	7.06E+00	4.91E-06
HOXA11	25.48270253	-1.073336752	0.200569337	-5.351449873	8.73E-08	7.06E+00	4.96E-06
PROM2	2776.181581	-0.5487433	0.10267133	-5.344659511	9.06E-08	7.04E+00	5.13E-06
KIRREL2	8.330268918	1.82455428	0.34167493	5.340029722	9.29E-08	7.03E+00	5.25E-06
UGT2B28	21.97484028	-2.630175147	0.493006205	-5.334973721	9.56E-08	7.02E+00	5.38E-06
RASL12	167.6893564	0.613213609	0.114985746	5.332953271	9.66E-08	7.01E+00	5.43E-06
HABP2	25.02539304	-1.742625637	0.326877951	-5.331120166	9.76E-08	7.01E+00	5.47E-06
SMPDL3A	302.3250114	-0.634517585	0.119194107	-5.323397258	1.02E-07	6.99E+00	5.67E-06
EDNRB	238.6295007	0.694907493	0.130539035	5.323369296	1.02E-07	6.99E+00	5.67E-06
S100A9	2332.546469	-1.631283371	0.306831333	-5.316547544	1.06E-07	6.98E+00	5.87E-06
PVALB	221.0226394	2.154780213	0.405446041	5.314591816	1.07E-07	6.97E+00	5.92E-06
KMO	263.3611981	-1.015490337	0.191138102	-5.312861875	1.08E-07	6.97E+00	5.96E-06
CCL21	195.6907456	1.357727658	0.255881088	5.306088345	1.12E-07	6.95E+00	6.17E-06
ENPP2	649.9614826	0.785139334	0.148057814	5.302924002	1.14E-07	6.94E+00	6.26E-06
LRRC4B	9.163311103	0.844638795	0.159460054	5.2968676	1.18E-07	6.93E+00	6.45E-06
LGALS2	24.82189033	1.210717128	0.228606644	5.296071482	1.18E-07	6.93E+00	6.46E-06
ATP6V1B1	486.9626161	1.173270925	0.221628853	5.293854613	1.2E-07	6.92E+00	6.52E-06
PHLDA2	150.7065249	-0.753837877	0.142796567	-5.279103635	1.3E-07	6.89E+00	7.05E-06
WNT6	19.39881148	1.540618821	0.292176128	5.272911341	1.34E-07	6.87E+00	7.27E-06
HPSE2	3.986524213	1.748502238	0.331815192	5.269506279	1.37E-07	6.86E+00	7.39E-06
FSD1	6.365386683	1.646843374	0.312787285	5.265058568	1.4E-07	6.85E+00	7.55E-06
SHANK3	408.7327754	0.431630943	0.082053842	5.260337976	1.44E-07	6.84E+00	7.7E-06
FGF9	8.891718837	1.426791699	0.271209509	5.260846877	1.43E-07	6.84E+00	7.7E-06
WDR16	4.707205995	-1.376903823	0.26199558	-5.255446773	1.48E-07	6.83E+00	7.89E-06
HTR7P1	255.5627098	0.870283426	0.165660153	5.253426439	1.49E-07	6.83E+00	7.95E-06
TNFSF4	197.300678	-0.650294586	0.123811483	-5.252296239	1.5E-07	6.82E+00	7.98E-06
HYAL1	45.23711315	0.798437553	0.152144105	5.247903298	1.54E-07	6.81E+00	8.14E-06
NRG2	14.65378158	1.343948526	0.256106081	5.247624433	1.54E-07	6.81E+00	8.14E-06
LST-3TM12	1.380619835	-3.664558483	0.698827424	-5.243867595	1.57E-07	6.8E+00	8.27E-06
CRISPLD1	665.4734899	1.153222869	0.219927841	5.243642031	1.57E-07	6.8E+00	8.27E-06
CCDC117	1754.697131	0.646383915	0.123297435	5.242476563	1.58E-07	6.8E+00	8.31E-06
SLC25A18	26.86978517	-1.101953722	0.21023551	-5.241520425	1.59E-07	6.8E+00	8.33E-06
A2M	15202.16165	0.61255982	0.116891558	5.240411123	1.6E-07	6.8E+00	8.34E-06
TRH	83.84182954	2.019111677	0.385315306	5.240154352	1.6E-07	6.79E+00	8.34E-06
SFXN3	1119.452714	-0.363021328	0.069351098	-5.234543356	1.65E-07	6.78E+00	8.58E-06
KRT13	49.0560432	2.49777435	0.477374622	5.232314907	1.67E-07	6.78E+00	8.66E-06
ARRB1	652.9177283	0.600270011	0.114750112	5.231106075	1.68E-07	6.77E+00	8.67E-06
FBN3	28.2345056	1.689519777	0.322971492	5.231173084	1.68E-07	6.77E+00	8.67E-06
PTPN1	2450.185091	0.561891031	0.107461011	5.228789714	1.71E-07	6.77E+00	8.76E-06
KIAA1755	187.4173045	0.784060908	0.150020031	5.226374788	1.73E-07	6.76E+00	8.85E-06
GBE1	630.7671815	-0.406768291	0.077961903	-5.217526464	1.81E-07	6.74E+00	9.26E-06
PCMTD2	1679.505206	0.471875899	0.09045636	5.216613843	1.82E-07	6.74E+00	9.28E-06
HILS1	2.745963322	2.144571479	0.411367957	5.213268175	1.86E-07	6.73E+00	9.43E-06
TNFRSF10C	56.67400528	-0.857108045	0.164580127	-5.207846532	1.91E-07	6.72E+00	9.68E-06
PPP3CA	1654.281952	-0.536077047	0.102984083	-5.205435936	1.94E-07	6.71E+00	9.78E-06
CSN2	71.64734911	8.74355088	1.681375316	5.200237447	1.99E-07	6.7E+00	1E-05
ENTPD3	152.4076074	-1.031773767	0.198521426	-5.197291734	2.02E-07	6.69E+00	1.02E-05
NECAB1	53.0468589	0.931876814	0.179398153	5.194461577	2.05E-07	6.69E+00	1.03E-05
NXPH3	220.1176547	0.960822508	0.185017239	5.193151255	2.07E-07	6.68E+00	1.03E-05
GPR64	38.005797	1.084737293	0.208867649	5.193419374	2.06E-07	6.69E+00	1.03E-05
FAM102B	1552.837063	0.590671758	0.113814973	5.189754416	2.11E-07	6.68E+00	1.05E-05
F2RL2	702.3891426	0.891963405	0.172032684	5.184848498	2.16E-07	6.67E+00	1.07E-05
LOC93432	4.036395626	3.216358434	0.620397036	5.184354932	2.17E-07	6.66E+00	1.07E-05
TRY6.00	2.419409477	3.044187284	0.587603589	5.180681909	2.21E-07	6.66E+00	1.09E-05
CORIN	154.1363725	-0.928742404	0.179338115	-5.178722918	2.23E-07	6.65E+00	1.1E-05
ASCC3	1439.265063	-0.397168547	0.076715101	-5.177188635	2.25E-07	6.65E+00	1.11E-05
AADAT	85.68484114	-0.950202581	0.183741725	-5.171403399	2.32E-07	6.63E+00	1.14E-05
HEBP1	1893.585051	0.647445327	0.125218154	5.170538841	2.33E-07	6.63E+00	1.14E-05
ANGPTL1	58.53327445	0.83730866	0.162125894	5.164558489	2.41E-07	6.62E+00	1.18E-05
ATP13A4	138.0504059	-1.42699121	0.276502883	-5.160854733	2.46E-07	6.61E+00	1.2E-05
SERPINA6	774.7277214	2.534526853	0.491799575	5.153576745	2.56E-07	6.59E+00	1.24E-05
CAPN2	5756.040262	-0.481684086	0.093666924	-5.142520625	2.71E-07	6.57E+00	1.31E-05
LRFN5	16.12371597	0.892250817	0.17348429	5.143121712	2.7E-07	6.57E+00	1.31E-05
CCDC81	7.206805789	-0.663938047	0.129155454	-5.14061178	2.74E-07	6.56E+00	1.32E-05
UNC80	6.102482284	1.664894266	0.323983171	5.138829461	2.76E-07	6.56E+00	1.33E-05
MFAP5	1153.810707	-0.7958228	0.155014774	-5.13385129	2.84E-07	6.55E+00	1.36E-05
FKBP5	2226.892203	-0.754421394	0.146990122	-5.132463215	2.86E-07	6.54E+00	1.36E-05
SNAP91	6.572374479	1.455918834	0.283650251	5.132795859	2.85E-07	6.54E+00	1.36E-05
BCAR4	3.324590666	3.025764622	0.5896426	5.131523102	2.87E-07	6.54E+00	1.37E-05
NR5A2	87.18685106	0.626355856	0.122259305	5.123175327	3E-07	6.52E+00	1.43E-05
C7orf51	6.810438547	0.939981627	0.183523632	5.121856069	3.03E-07	6.52E+00	1.43E-05
PPM1E	70.8305051	1.157330669	0.22613121	5.117960806	3.09E-07	6.51E+00	1.46E-05
C2orf71	1.700410637	1.960063311	0.38309945	5.116330264	3.12E-07	6.51E+00	1.47E-05
NELL1	15.51936226	3.074889343	0.601570869	5.111433256	3.2E-07	6.5E+00	1.5E-05
SYNPO2	1184.112419	0.764174975	0.149541351	5.110124873	3.22E-07	6.49E+00	1.51E-05
RAET1E	25.16910302	-1.06637009	0.208847021	-5.105986599	3.29E-07	6.48E+00	1.54E-05
S1PR1	481.1489555	0.560286193	0.10981371	5.102151558	3.36E-07	6.47E+00	1.57E-05
MRGPRX3	5.589307548	1.675773048	0.328922656	5.094732808	3.49E-07	6.46E+00	1.63E-05
IGSF10	123.831362	0.959531285	0.1884975	5.090419162	3.57E-07	6.45E+00	1.66E-05
ATP1A2	77.93756235	1.287925158	0.253010476	5.090402493	3.57E-07	6.45E+00	1.66E-05
RGS5	3936.14686	0.807323384	0.158694879	5.087268015	3.63E-07	6.44E+00	1.68E-05
MAGEA9B	2.814062586	3.476361591	0.683400435	5.086858909	3.64E-07	6.44E+00	1.68E-05
BSN	82.33404958	0.946867481	0.186222017	5.084616185	3.68E-07	6.43E+00	1.69E-05
MS4A1	155.8458862	1.442591986	0.283778213	5.083519171	3.71E-07	6.43E+00	1.69E-05
CHRDL2	17.06618356	1.516065852	0.298221721	5.083686879	3.7E-07	6.43E+00	1.69E-05
MYOC	6.678927488	2.102664991	0.413623995	5.083517923	3.71E-07	6.43E+00	1.69E-05
GZMM	22.99055093	1.067607394	0.21019576	5.079110045	3.79E-07	6.42E+00	1.73E-05
MAL	19.85575807	1.114805254	0.219505595	5.078709977	3.8E-07	6.42E+00	1.73E-05
EYA1	43.24488585	1.488865633	0.293185594	5.078235977	3.81E-07	6.42E+00	1.73E-05
SLC7A14	0.907306938	2.007020094	0.395464875	5.075090661	3.87E-07	6.41E+00	1.75E-05
COL9A3	82.20961547	1.266142694	0.249532158	5.074066231	3.89E-07	6.41E+00	1.76E-05
ABCC12	36.24701002	-1.936898844	0.382038135	-5.069909692	3.98E-07	6.4E+00	1.78E-05
JAKMIP2	20.39146944	-0.918033544	0.181033884	-5.071059212	3.96E-07	6.4E+00	1.78E-05
CRMP1	179.1351625	0.842619293	0.166184733	5.070377275	3.97E-07	6.4E+00	1.78E-05
RASGEF1C	6.913439444	1.948005579	0.384209487	5.070165216	3.97E-07	6.4E+00	1.78E-05
C7orf10	85.08880917	-0.664791076	0.131255086	-5.064878614	4.09E-07	6.39E+00	1.82E-05
BOC	513.4489512	0.759593656	0.150004873	5.063793218	4.11E-07	6.39E+00	1.82E-05
AQP11	49.14606407	0.802763388	0.158472391	5.06563561	4.07E-07	6.39E+00	1.82E-05
NRTN	18.03726941	1.136105944	0.224280256	5.065563786	4.07E-07	6.39E+00	1.82E-05
IL20	115.8006933	1.608309796	0.317592831	5.064062035	4.1E-07	6.39E+00	1.82E-05
IGF1	538.6822936	0.871502837	0.172160176	5.062162781	4.15E-07	6.38E+00	1.83E-05
FAM118B	253.8785521	-0.299374007	0.059207844	-5.056323412	4.27E-07	6.37E+00	1.88E-05
CASP14	80.83220044	-2.628620784	0.519918137	-5.055835906	4.29E-07	6.37E+00	1.89E-05
DBC1	58.63157735	1.389767586	0.275028891	5.053169442	4.35E-07	6.36E+00	1.91E-05
VSTM2A	341.6674462	2.620146382	0.51858272	5.052513864	4.36E-07	6.36E+00	1.91E-05
SLC46A2	11.24161074	-0.720915037	0.142736441	-5.050672639	4.4E-07	6.36E+00	1.92E-05
COL12A1	14746.62212	-0.714756306	0.141779984	-5.041306167	4.62E-07	6.34E+00	2.01E-05
LRTM2	29.72656502	1.701858562	0.337549348	5.041806699	4.61E-07	6.34E+00	2.01E-05
APLN	191.9961266	-0.723180636	0.143548397	-5.037887215	4.71E-07	6.33E+00	2.04E-05
LPAR3	32.35501949	-1.368686999	0.27178211	-5.035971647	4.75E-07	6.32E+00	2.06E-05
ODZ1	20.58729044	-1.098239066	0.218262781	-5.031728538	4.86E-07	6.31E+00	2.1E-05
SFRP1	3848.652673	1.393970651	0.277158034	5.029515582	4.92E-07	6.31E+00	2.12E-05
CLDN11	159.3137576	0.880775974	0.175241401	5.026072441	5.01E-07	6.3E+00	2.15E-05
EPHB4	2410.274482	-0.467785653	0.093196598	-5.019342564	5.18E-07	6.29E+00	2.22E-05
RHOBTB2	503.046381	-0.441442346	0.087937507	-5.01995522	5.17E-07	6.29E+00	2.22E-05
PTN	386.3558794	0.986050932	0.196507632	5.017876008	5.22E-07	6.28E+00	2.23E-05
FEZ1	104.5511958	-0.551204665	0.109946394	-5.013394659	5.35E-07	6.27E+00	2.28E-05
PRSS12	46.70309422	1.286769423	0.256745525	5.011847513	5.39E-07	6.27E+00	2.29E-05
HS6ST2	154.8323224	-1.19441477	0.23865211	-5.004836401	5.59E-07	6.25E+00	2.37E-05
RNF43	732.7393454	0.763582838	0.152648704	5.002222853	5.67E-07	6.25E+00	2.4E-05
CWH43	32.47661851	-2.072270805	0.41436131	-5.001120414	5.7E-07	6.24E+00	2.41E-05
GREM1	1315.452672	-0.794553389	0.158890963	-5.000620378	5.71E-07	6.24E+00	2.41E-05
ALX3	19.78296371	0.679634592	0.135991279	4.99763365	5.8E-07	6.24E+00	2.44E-05
SLC12A5	6.389660206	1.204526304	0.241097325	4.996016883	5.85E-07	6.23E+00	2.46E-05
GBX2	2.025365889	-1.305208	0.261551369	-4.990254906	6.03E-07	6.22E+00	2.52E-05
ANXA4	1693.717858	-0.284383978	0.056979728	-4.990967599	6.01E-07	6.22E+00	2.52E-05
TEX14	55.07971046	1.185508143	0.237557876	4.99039713	6.03E-07	6.22E+00	2.52E-05
UBD	1222.35877	1.228834164	0.24635196	4.988124161	6.1E-07	6.21E+00	2.54E-05
H2AFJ	2581.663598	0.735511546	0.147486716	4.986968076	6.13E-07	6.21E+00	2.55E-05
TMEM150C	947.7132548	1.211375349	0.242931208	4.986495388	6.15E-07	6.21E+00	2.55E-05
CDH7	17.38563183	1.848170158	0.370600366	4.986962583	6.13E-07	6.21E+00	2.55E-05
GIMAP7	256.3127509	0.65905706	0.132208622	4.984977911	6.2E-07	6.21E+00	2.56E-05
PLAU	2160.294954	-0.668818806	0.134298658	-4.980085551	6.36E-07	6.2E+00	2.62E-05
AQP3	1250.711203	-1.116182747	0.22418761	-4.978788739	6.4E-07	6.19E+00	2.63E-05
OXER1	20.93234173	-0.838464901	0.168466497	-4.97704242	6.46E-07	6.19E+00	2.65E-05
GPR158	67.87838169	1.319584271	0.265162727	4.97650739	6.47E-07	6.19E+00	2.65E-05
GLP1R	9.722413585	1.342325627	0.269802155	4.975222043	6.52E-07	6.19E+00	2.67E-05
TMEM170B	214.2779831	0.464293532	0.093397014	4.971181762	6.65E-07	6.18E+00	2.72E-05
TEX9	111.1783514	-0.569602045	0.114630474	-4.969028096	6.73E-07	6.17E+00	2.73E-05
OLFM3	4.554279577	3.739660247	0.752471125	4.969838871	6.7E-07	6.17E+00	2.73E-05
SCRT1	2.705440468	2.085106382	0.419923837	4.965439438	6.85E-07	6.16E+00	2.78E-05
CLCA4	6.141164747	1.79063517	0.360988966	4.960359841	7.04E-07	6.15E+00	2.85E-05
PADI1	2.452993897	-1.606962655	0.324072276	-4.958655139	7.1E-07	6.15E+00	2.87E-05
FZD7	1048.26128	0.625112932	0.126138676	4.955759423	7.2E-07	6.14E+00	2.9E-05
FXYD7	3.116183179	1.179200661	0.23806504	4.953271006	7.3E-07	6.14E+00	2.94E-05
FAM135B	41.74247242	1.404840467	0.283792924	4.950230776	7.41E-07	6.13E+00	2.98E-05
ANTXR1	5893.783687	-0.610695055	0.123472954	-4.945982392	7.58E-07	6.12E+00	3.04E-05
OXTR	277.4640357	1.001028938	0.202548618	4.942166217	7.73E-07	6.11E+00	3.08E-05
TF	219.3335473	1.30388046	0.263809512	4.942507385	7.71E-07	6.11E+00	3.08E-05
MAPK6	1296.118254	-0.349088403	0.070718812	-4.936287746	7.96E-07	6.1E+00	3.16E-05
NTSR2	2.036531548	2.893142377	0.585998186	4.937118316	7.93E-07	6.1E+00	3.16E-05
MBD4	966.0724432	-0.238289064	0.048279631	-4.935602375	7.99E-07	6.1E+00	3.17E-05
CD69	131.7830306	0.82256899	0.166723205	4.933740258	8.07E-07	6.09E+00	3.19E-05
ACPP	42.25706006	-0.777371971	0.157750955	-4.927843207	8.31E-07	6.08E+00	3.28E-05
XRCC4	136.055331	-0.271993295	0.055228954	-4.924831574	8.44E-07	6.07E+00	3.32E-05
RNF112	5.781230944	0.78537446	0.15947752	4.924671902	8.45E-07	6.07E+00	3.32E-05
SGCG	15.48521149	1.424333742	0.289237866	4.92443732	8.46E-07	6.07E+00	3.32E-05
AQP1	3110.931255	0.591899861	0.120227948	4.923146974	8.52E-07	6.07E+00	3.34E-05
FGF5	4.612143384	-1.312521923	0.266753787	-4.92034972	8.64E-07	6.06E+00	3.36E-05
IL28RA	117.1628541	0.524175492	0.106528395	4.920523697	8.63E-07	6.06E+00	3.36E-05
PLAC8	44.88312106	1.040758251	0.211467681	4.921594853	8.58E-07	6.07E+00	3.36E-05
PLA2G2D	115.8465627	1.363859682	0.277186671	4.920365318	8.64E-07	6.06E+00	3.36E-05
ANGPT2	322.2613415	-0.504561319	0.102579679	-4.918725858	8.71E-07	6.06E+00	3.38E-05
C14orf34	1.079130595	-1.477183577	0.300365536	-4.91795296	8.75E-07	6.06E+00	3.39E-05
SMR3B	7.827033809	3.147859239	0.64014601	4.917408198	8.77E-07	6.06E+00	3.39E-05
PCDH7	552.6900834	-0.687049007	0.139815064	-4.913984137	8.92E-07	6.05E+00	3.44E-05
LOC389458	4.215678724	1.217353491	0.247723889	4.914154608	8.92E-07	6.05E+00	3.44E-05
TMEM92	20.16704495	-0.919751944	0.187474272	-4.906016879	9.29E-07	6.03E+00	3.56E-05
ITIH4	40.37723525	-0.733801289	0.14957711	-4.905839449	9.3E-07	6.03E+00	3.56E-05
SLC17A9	160.3965929	0.900521227	0.183545475	4.906256765	9.28E-07	6.03E+00	3.56E-05
GLRA3	61.21466936	2.239952521	0.456877189	4.902745367	9.45E-07	6.02E+00	3.61E-05
KCNE1L	5.629140565	1.333136251	0.272169643	4.898181284	9.67E-07	6.01E+00	3.69E-05
SLAMF9	9.337227771	-0.998148355	0.203824984	-4.897085398	9.73E-07	6.01E+00	3.7E-05
NDRG2	1478.831781	0.719200793	0.146885667	4.896330661	9.76E-07	6.01E+00	3.71E-05
ABCA12	661.3333122	-1.330912703	0.271991346	-4.89321709	9.92E-07	6E+00	3.75E-05
C1orf192	55.79370124	-0.756415938	0.154578974	-4.893394744	9.91E-07	6E+00	3.75E-05
D4S234E	37.00662554	0.996080733	0.203654579	4.891030386	1E-06	6E+00	3.79E-05
KLHL14	19.7520231	-1.083294009	0.22160264	-4.888452634	1.02E-06	5.99E+00	3.82E-05
PPEF1	64.16792348	-0.73863957	0.151125148	-4.887601952	1.02E-06	5.99E+00	3.82E-05
DEF6	388.7625251	0.41406656	0.08471163	4.887954134	1.02E-06	5.99E+00	3.82E-05
LOC285593	19.53355764	1.09239242	0.223501447	4.887630195	1.02E-06	5.99E+00	3.82E-05
ST6GALNAC3	46.4018437	0.547862814	0.112163851	4.884486492	1.04E-06	5.98E+00	3.88E-05
KCNMB1	130.0345786	0.793367129	0.162482109	4.882796844	1.05E-06	5.98E+00	3.9E-05
AVPR2	11.58511463	0.876235252	0.17951764	4.881053759	1.06E-06	5.98E+00	3.93E-05
DSC3	589.8989051	1.350257208	0.276687884	4.880073491	1.06E-06	5.97E+00	3.94E-05
SLC18A1	1.563039273	1.971241542	0.403901125	4.8805052	1.06E-06	5.98E+00	3.94E-05
TNNT3	9.193907806	1.4031312	0.287613305	4.878533694	1.07E-06	5.97E+00	3.96E-05
SPA17	175.2790096	-0.524299842	0.107617267	-4.871893305	1.11E-06	5.96E+00	4.09E-05
TAX1BP3	1946.777242	-0.370174436	0.0760954	-4.864609895	1.15E-06	5.94E+00	4.23E-05
GCNT3	9.120507114	-1.299586414	0.267207266	-4.863589362	1.15E-06	5.94E+00	4.24E-05
C13orf31	284.1907102	-0.408853344	0.08406458	-4.86356255	1.15E-06	5.94E+00	4.24E-05
CXCR5	34.15067947	1.083337795	0.222808341	4.862195873	1.16E-06	5.94E+00	4.26E-05
GRAMD1A	1697.399277	0.327770446	0.067451181	4.859372947	1.18E-06	5.93E+00	4.31E-05
SPINK8	28.70614027	-1.764970163	0.363395521	-4.856884754	1.19E-06	5.92E+00	4.36E-05
PTGDS	327.8379892	0.981216052	0.202090081	4.855339993	1.2E-06	5.92E+00	4.39E-05
ELAVL3	3.4779837	2.677665733	0.551815132	4.852468837	1.22E-06	5.91E+00	4.44E-05
GNG7	196.8944541	0.631884844	0.130341021	4.847935368	1.25E-06	5.9E+00	4.54E-05
CASP8	620.4816503	-0.330963306	0.068283148	-4.846925137	1.25E-06	5.9E+00	4.55E-05
YSK4	8.591663985	-1.797338359	0.371065459	-4.843723159	1.27E-06	5.89E+00	4.62E-05
CALM3	4699.875257	0.268452384	0.055453941	4.840997369	1.29E-06	5.89E+00	4.66E-05
SLCO5A1	14.23498773	1.133977979	0.234239122	4.841112654	1.29E-06	5.89E+00	4.66E-05
FCRL1	9.904123522	1.579245192	0.326232816	4.840853269	1.29E-06	5.89E+00	4.66E-05
ODAM	6.971859863	2.650529269	0.547816386	4.838353388	1.31E-06	5.88E+00	4.71E-05
ZNF853	222.9814736	0.592687671	0.122517218	4.837586773	1.31E-06	5.88E+00	4.72E-05
FAM117A	359.3752188	0.446419992	0.092333039	4.834888982	1.33E-06	5.88E+00	4.76E-05
SLC5A10	3.542247318	1.003200021	0.207514781	4.834354523	1.34E-06	5.87E+00	4.76E-05
FAM196B	15.57184107	1.128828313	0.233501299	4.83435561	1.34E-06	5.87E+00	4.76E-05
SIAH3	2.035144646	1.324968241	0.274065445	4.834495784	1.33E-06	5.87E+00	4.76E-05
C18orf34	7.913952102	0.95737227	0.198198564	4.830369347	1.36E-06	5.87E+00	4.85E-05
AGFG1	1861.290225	-0.318740482	0.06602879	-4.827295542	1.38E-06	5.86E+00	4.92E-05
APOD	7670.064237	-1.222600089	0.253533294	-4.822246698	1.42E-06	5.85E+00	5.01E-05
C15orf34	20.35024399	-0.587595183	0.121835673	-4.822850071	1.42E-06	5.85E+00	5.01E-05
HIF3A	16.90925858	1.283881844	0.266235034	4.822362492	1.42E-06	5.85E+00	5.01E-05
FHAD1	44.51973648	-0.569281311	0.118146275	-4.818444866	1.45E-06	5.84E+00	5.08E-05
NTM	326.7156255	-0.551808821	0.114525156	-4.818232436	1.45E-06	5.84E+00	5.08E-05
CLEC4F	12.47691679	1.093647085	0.22696006	4.818676393	1.45E-06	5.84E+00	5.08E-05
FZD9	20.51605558	1.322898916	0.274571063	4.818056584	1.45E-06	5.84E+00	5.08E-05
DCST1	1.182750239	-0.991713711	0.206028572	-4.813476601	1.48E-06	5.83E+00	5.19E-05
ICA1L	110.1690694	0.63314725	0.131610019	4.810783073	1.5E-06	5.82E+00	5.25E-05
PYGM	11.48492636	0.753252005	0.156587189	4.810431874	1.51E-06	5.82E+00	5.25E-05
C12orf75	347.2064259	-0.633948366	0.131800893	-4.809894311	1.51E-06	5.82E+00	5.26E-05
NAMPT	2338.849623	-0.516194644	0.107335987	-4.809147962	1.52E-06	5.82E+00	5.27E-05
GALE	713.1594795	-0.495683535	0.103091296	-4.808199681	1.52E-06	5.82E+00	5.28E-05
FXYD1	25.86141538	1.067422293	0.222179628	4.80432118	1.55E-06	5.81E+00	5.38E-05
CTNNA1	10137.03601	-0.25596814	0.053298316	-4.802555898	1.57E-06	5.81E+00	5.42E-05
ITPRIPL1	23.25883726	0.710359392	0.147942109	4.801603798	1.57E-06	5.8E+00	5.43E-05
GPER	120.2749524	0.968408837	0.20171524	4.800870946	1.58E-06	5.8E+00	5.43E-05
CYP24A1	36.21354303	1.764332313	0.36745824	4.80144986	1.58E-06	5.8E+00	5.43E-05
HS3ST2	48.37668466	-0.837562028	0.174519161	-4.799255413	1.59E-06	5.8E+00	5.47E-05
TUBA4A	912.907783	-0.720046433	0.150063851	-4.79826707	1.6E-06	5.8E+00	5.48E-05
SGIP1	112.7655577	-0.640545352	0.133489152	-4.79848245	1.6E-06	5.8E+00	5.48E-05
MMP11	9175.187962	-0.810422368	0.168961715	-4.796485222	1.61E-06	5.79E+00	5.51E-05
GDF10	20.95545695	1.04345114	0.217547322	4.796432925	1.62E-06	5.79E+00	5.51E-05
ABP1	31.04221271	1.212203599	0.252911667	4.792992002	1.64E-06	5.78E+00	5.59E-05
TMEM167A	2539.31035	-0.246252354	0.05139178	-4.791668149	1.65E-06	5.78E+00	5.62E-05
RELL1	843.3658874	0.496633795	0.103651138	4.79139743	1.66E-06	5.78E+00	5.62E-05
PDE5A	644.559426	0.776960415	0.162204417	4.790007752	1.67E-06	5.78E+00	5.65E-05
MCCD1	8.826379947	2.353828114	0.491506132	4.789010673	1.68E-06	5.78E+00	5.67E-05
GNAO1	125.0973533	1.037935426	0.216904477	4.78521901	1.71E-06	5.77E+00	5.76E-05
ARCN1	5060.820023	-0.259422325	0.054300815	-4.77750338	1.77E-06	5.75E+00	5.98E-05
KLK2	3.127457474	-1.159062767	0.242640586	-4.776870954	1.78E-06	5.75E+00	5.99E-05
PSORS1C1	12.66094086	-0.865643459	0.181277937	-4.775227892	1.8E-06	5.75E+00	6.02E-05
POU5F1B	11.57676318	0.684243191	0.143280278	4.775557381	1.79E-06	5.75E+00	6.02E-05
LRRC70	40.39205225	0.540358392	0.113185053	4.774114412	1.8E-06	5.74E+00	6.03E-05
GLDC	122.7479103	1.525205068	0.319470361	4.774167671	1.8E-06	5.74E+00	6.03E-05
UBE4A	1826.138708	-0.253255858	0.053057807	-4.773206264	1.81E-06	5.74E+00	6.05E-05
FGF14	171.1750118	-0.760222049	0.159304844	-4.77212136	1.82E-06	5.74E+00	6.06E-05
GRIN2C	29.79894486	1.04526417	0.219040116	4.772021618	1.82E-06	5.74E+00	6.06E-05
TMEM108	76.82649304	0.921788089	0.193257806	4.769732758	1.84E-06	5.73E+00	6.12E-05
C14orf73	9.766507767	1.112018443	0.233153222	4.769474907	1.85E-06	5.73E+00	6.12E-05
C9orf128	5.945248176	-0.923098914	0.193703091	-4.765535291	1.88E-06	5.73E+00	6.23E-05
PSD	52.96643504	0.8364326	0.175536227	4.765014113	1.89E-06	5.72E+00	6.23E-05
ABCA10	22.10649576	0.973828053	0.204504431	4.761892191	1.92E-06	5.72E+00	6.32E-05
GABRA5	3.825198996	2.345854946	0.492892878	4.759360601	1.94E-06	5.71E+00	6.39E-05
MBP	695.834009	0.547265595	0.115100583	4.754672668	1.99E-06	5.7E+00	6.53E-05
CAPN11	11.52623763	0.807623995	0.169887126	4.753885786	2E-06	5.7E+00	6.53E-05
TLR10	45.76623177	0.903306667	0.189992601	4.754430771	1.99E-06	5.7E+00	6.53E-05
CH25H	51.70655061	0.731410765	0.153887457	4.752893978	2.01E-06	5.7E+00	6.55E-05
APOLD1	675.3002515	0.550310788	0.11582005	4.751429389	2.02E-06	5.69E+00	6.59E-05
GJB2	1090.831497	-0.845531636	0.17814498	-4.746311881	2.07E-06	5.68E+00	6.75E-05
TP53INP2	1082.222366	-0.461441312	0.097240315	-4.745370382	2.08E-06	5.68E+00	6.77E-05
CTSE	7.313979399	-1.985533633	0.418711225	-4.74201195	2.12E-06	5.67E+00	6.87E-05
C1orf161	5.475621105	-1.14831381	0.242226199	-4.740667254	2.13E-06	5.67E+00	6.89E-05
GPX8	1028.556382	-0.478335314	0.100893111	-4.741010633	2.13E-06	5.67E+00	6.89E-05
CLEC10A	80.49425894	1.059328586	0.223476964	4.740213792	2.13E-06	5.67E+00	6.9E-05
LHFPL4	4.828298685	1.880227921	0.396720015	4.739432974	2.14E-06	5.67E+00	6.91E-05
PKM2	21845.44764	-0.345044386	0.072855638	-4.736001148	2.18E-06	5.66E+00	6.97E-05
PTDSS2	470.8454938	0.353244451	0.074582292	4.736304603	2.18E-06	5.66E+00	6.97E-05
SLC27A4	965.3497282	0.396864143	0.083790562	4.736382422	2.18E-06	5.66E+00	6.97E-05
EMCN	331.7987132	0.557088375	0.117633621	4.735792122	2.18E-06	5.66E+00	6.97E-05
ACSL6	25.11649476	1.010001516	0.213215019	4.737009236	2.17E-06	5.66E+00	6.97E-05
FAM3B	277.6596943	1.396717555	0.294841916	4.737174323	2.17E-06	5.66E+00	6.97E-05
SDR16C5	404.1944868	-1.302594444	0.275483575	-4.728392406	2.26E-06	5.65E+00	7.22E-05
MAP3K5	502.9614479	-0.486996992	0.103104582	-4.723330253	2.32E-06	5.63E+00	7.38E-05
SELE	225.2631661	0.929731643	0.196828689	4.723557563	2.32E-06	5.63E+00	7.38E-05
TLE2	531.2649027	0.550022661	0.116536862	4.71973117	2.36E-06	5.63E+00	7.5E-05
TAL1	52.36174649	0.548392471	0.116256595	4.717086976	2.39E-06	5.62E+00	7.58E-05
CLEC5A	169.8673938	-0.754260368	0.159940717	-4.715874616	2.41E-06	5.62E+00	7.61E-05
SLC41A2	305.7490644	-0.524167154	0.111178473	-4.71464608	2.42E-06	5.62E+00	7.65E-05
LASS1	25.64234626	1.105692735	0.234668864	4.711714694	2.46E-06	5.61E+00	7.75E-05
BRCC3	853.8554518	-0.275589957	0.05850974	-4.710155256	2.48E-06	5.61E+00	7.78E-05
MYOZ1	26.51124431	0.97703976	0.207430734	4.710197678	2.47E-06	5.61E+00	7.78E-05
ACR	3.694467942	1.00282008	0.212962996	4.70889356	2.49E-06	5.6E+00	7.82E-05
HOXD11	3.299300232	-0.941758564	0.200059625	-4.707389432	2.51E-06	5.6E+00	7.86E-05
CEP68	733.2931735	0.259065109	0.055044	4.706509488	2.52E-06	5.6E+00	7.88E-05
LOC728264	160.2922453	0.746621875	0.158768297	4.702587914	2.57E-06	5.59E+00	8.02E-05
EXOC2	1723.508166	0.565490395	0.120332331	4.699405292	2.61E-06	5.58E+00	8.14E-05
SULT1C4	30.08620126	0.785897506	0.167243485	4.699121814	2.61E-06	5.58E+00	8.14E-05
UNK	682.0829992	0.298387897	0.063534321	4.696483606	2.65E-06	5.58E+00	8.22E-05
BZRAP1	318.7207642	0.632836862	0.13473861	4.696774443	2.64E-06	5.58E+00	8.22E-05
PNLDC1	5.861946158	-1.552619836	0.330710723	-4.694797384	2.67E-06	5.57E+00	8.23E-05
ACP6	306.5908397	-0.440098565	0.093721811	-4.695796657	2.66E-06	5.58E+00	8.23E-05
CXorf26	553.7107193	-0.307691332	0.065537686	-4.694876352	2.67E-06	5.57E+00	8.23E-05
TMEM200C	17.54816245	0.854561513	0.182020584	4.694861945	2.67E-06	5.57E+00	8.23E-05
STRA6	160.3177666	0.596860544	0.12714817	4.694212613	2.68E-06	5.57E+00	8.24E-05
CHI3L1	1710.584849	1.127256828	0.240452178	4.68807077	2.76E-06	5.56E+00	8.48E-05
HOXA11AS	5.669432555	-0.956001337	0.203959807	-4.687204559	2.77E-06	5.56E+00	8.5E-05
WNT2	241.6067917	-0.692243452	0.147695785	-4.68695468	2.77E-06	5.56E+00	8.5E-05
CNTN1	182.117118	-0.976286324	0.20833938	-4.68603834	2.79E-06	5.56E+00	8.52E-05
PGS1	492.9351857	0.333949655	0.071269281	4.685744665	2.79E-06	5.55E+00	8.52E-05
PIH1D2	43.06538553	-0.568016015	0.121419487	-4.678128913	2.9E-06	5.54E+00	8.83E-05
HRH1	177.2709513	-0.491434322	0.105061565	-4.677584247	2.9E-06	5.54E+00	8.83E-05
TUBAL3	25.34580758	0.882338138	0.188623595	4.677771822	2.9E-06	5.54E+00	8.83E-05
PDK4	911.8585136	0.80730897	0.172664614	4.675590152	2.93E-06	5.53E+00	8.9E-05
NRGN	54.36176807	-0.529127744	0.113238207	-4.672696258	2.97E-06	5.53E+00	9.01E-05
ZNF365	94.94928172	-0.665667635	0.142469269	-4.672359456	2.98E-06	5.53E+00	9.02E-05
UGT2B4	21.95116885	2.326102586	0.498155689	4.669428931	3.02E-06	5.52E+00	9.13E-05
STMN3	982.4629214	0.709794324	0.152039882	4.668474581	3.03E-06	5.52E+00	9.16E-05
FCRL3	32.15639246	1.203975412	0.258205875	4.662850562	3.12E-06	5.51E+00	9.4E-05
PAH	37.61403928	1.569524121	0.336762258	4.660629527	3.15E-06	5.5E+00	9.49E-05
C1QTNF4	4.790782937	0.907125392	0.194705155	4.658969569	3.18E-06	5.5E+00	9.55E-05
SERPIND1	1.32234573	-1.148611479	0.246609656	-4.657609506	3.2E-06	5.49E+00	9.6E-05
MAGI1	717.6249936	0.395721395	0.084973038	4.657023037	3.21E-06	5.49E+00	9.61E-05
TBC1D23	1030.872285	-0.239073583	0.051352759	-4.655515834	3.23E-06	5.49E+00	9.67E-05
COL25A1	10.17500129	0.918904757	0.197627041	4.649691415	3.32E-06	5.48E+00	9.93E-05
ALB	105.8676368	1.570923069	0.338127624	4.645947141	3.39E-06	5.47E+00	0.000100941
EXPH5	320.3675825	-0.462976252	0.099669452	-4.645116862	3.4E-06	5.47E+00	0.000101042
CLEC9A	7.397167419	1.012523735	0.217964571	4.64535924	3.39E-06	5.47E+00	0.000101042
C10orf55	11.87169259	-0.558378558	0.120221851	-4.644567982	3.41E-06	5.47E+00	0.000101159
LBP	158.2877866	-1.565556613	0.337484121	-4.63890452	3.5E-06	5.46E+00	0.000103814
MYOT	2.294831785	1.112311998	0.239868266	4.637178627	3.53E-06	5.45E+00	0.000104527
SELL	373.6187626	0.796856209	0.172026596	4.632168685	3.62E-06	5.44E+00	0.000106929
LOC100131726	2.139786006	-1.768170479	0.381917315	-4.62972065	3.66E-06	5.44E+00	0.000108039
PTPRCAP	177.6609466	0.87518811	0.189094587	4.628308649	3.69E-06	5.43E+00	0.000108615
IPCEF1	70.58777546	0.681687756	0.147511842	4.621240877	3.81E-06	5.42E+00	0.000112215
STAC	73.43307546	1.117124516	0.24177312	4.62054887	3.83E-06	5.42E+00	0.000112422
C16orf72	1532.51352	-0.241911788	0.052361695	-4.620014436	3.84E-06	5.42E+00	0.000112544
C15orf38	332.0998252	-0.444775148	0.096333338	-4.617042812	3.89E-06	5.41E+00	0.000113998
LOXL4	146.1313137	0.923724186	0.200104838	4.616201163	3.91E-06	5.41E+00	0.000114291
GLRX2	177.5463756	-0.362715698	0.078581236	-4.615805464	3.92E-06	5.41E+00	0.000114339
NR3C2	153.3895119	0.658175436	0.142603915	4.61540929	3.92E-06	5.41E+00	0.000114388
THSD7B	31.3070258	0.875565107	0.189783304	4.613499121	3.96E-06	5.4E+00	0.000115275
PLEKHG7	6.533267307	-1.316943219	0.285616881	-4.610873196	4.01E-06	5.4E+00	0.000115942
GCM1	9.461599278	-1.144831525	0.248295029	-4.610771029	4.01E-06	5.4E+00	0.000115942
GPR109B	24.10738651	-0.683713317	0.148273041	-4.611177542	4E-06	5.4E+00	0.000115942
ADK	424.1361837	-0.303732069	0.065866846	-4.611304263	4E-06	5.4E+00	0.000115942
FBLL1	25.39216559	1.126598716	0.244276811	4.611975697	3.99E-06	5.4E+00	0.000115942
MS4A8B	29.24216221	1.754113045	0.380525171	4.609716201	4.03E-06	5.39E+00	0.000116361
MAGEE1	176.2291717	0.439702891	0.095437129	4.607251869	4.08E-06	5.39E+00	0.000117576
RGS7BP	8.642034698	0.967465766	0.210042688	4.606043551	4.1E-06	5.39E+00	0.000118088
C2orf39	6.727054346	-1.464810553	0.318366916	-4.601013742	4.2E-06	5.38E+00	0.0001208
SLITRK6	2208.149016	-1.387877584	0.301746249	-4.599485791	4.24E-06	5.37E+00	0.000121512
MYRIP	111.9855737	0.856541774	0.186246172	4.598976531	4.25E-06	5.37E+00	0.000121632
IGF2BP1	8.270417679	-1.114596301	0.242395934	-4.598246681	4.26E-06	5.37E+00	0.000121882
HIBCH	530.1056965	-0.3164789	0.068855007	-4.596309188	4.3E-06	5.37E+00	0.000122842
FAM69B	166.7525097	0.501545826	0.109175975	4.593921197	4.35E-06	5.36E+00	0.000123898
C15orf59	57.6914253	0.977682104	0.212819156	4.593957244	4.35E-06	5.36E+00	0.000123898
ORAOV1	327.4526671	0.484027568	0.10539345	4.592577307	4.38E-06	5.36E+00	0.000124416
SLC5A12	4.566979436	1.82912248	0.398289144	4.592448747	4.38E-06	5.36E+00	0.000124416
DNAH17	33.51304681	0.653872778	0.142404932	4.591644182	4.4E-06	5.36E+00	0.000124717
GEM	623.1299251	0.607545157	0.132376439	4.589526362	4.44E-06	5.35E+00	0.000125808
HDAC5	1134.724297	0.307980692	0.067113527	4.588951063	4.45E-06	5.35E+00	0.000125974
ZNF613	192.8171498	-0.440065123	0.095923947	-4.587646105	4.48E-06	5.35E+00	0.000126582
ENTPD7	631.5231716	-0.341500577	0.074495726	-4.584163337	4.56E-06	5.34E+00	0.000128526
GNAZ	201.1732102	0.561117309	0.122443264	4.582671912	4.59E-06	5.34E+00	0.000129262
MMP1	962.8498395	-1.333738305	0.291276617	-4.578940528	4.67E-06	5.33E+00	0.000131401
VSIG8	2.580152149	-0.875099268	0.191201265	-4.57684874	4.72E-06	5.33E+00	0.000132344
FAM129C	7.856313826	1.124286201	0.245631097	4.577132996	4.71E-06	5.33E+00	0.000132344
PELI3	263.0222584	0.418846894	0.091542479	4.575437533	4.75E-06	5.32E+00	0.000132861
ADH1C	25.1644771	1.288547268	0.281621149	4.575463431	4.75E-06	5.32E+00	0.000132861
ADRA2B	18.58020998	0.766072721	0.167484581	4.573989539	4.79E-06	5.32E+00	0.000133594
MYO18B	15.706376	1.201214777	0.262658268	4.573298939	4.8E-06	5.32E+00	0.000133845
ARF4	5970.551894	-0.251409916	0.055010391	-4.570225935	4.87E-06	5.31E+00	0.000135631
PLEK2	160.8774272	-0.464118451	0.1015945	-4.568342281	4.92E-06	5.31E+00	0.000136219
SRPR	4026.090301	-0.264711991	0.057940628	-4.568676581	4.91E-06	5.31E+00	0.000136219
CADM3	67.51325793	1.040345807	0.227739525	4.568139	4.92E-06	5.31E+00	0.000136219
FLJ37543	1.68828943	1.326679181	0.290381992	4.568737792	4.91E-06	5.31E+00	0.000136219
OLAH	5.462965111	2.506695873	0.548920346	4.566593112	4.96E-06	5.3E+00	0.000137034
ADH7	7.186708325	4.913127906	1.076199297	4.565258423	4.99E-06	5.3E+00	0.000137716
USP6	53.65898395	0.461060278	0.101054148	4.562507185	5.05E-06	5.3E+00	0.000139338
MST1R	391.7544181	-0.600479242	0.131696333	-4.559574515	5.13E-06	5.29E+00	0.000141101
TNFRSF13B	8.63675636	1.264045003	0.277592808	4.553594209	5.27E-06	5.28E+00	0.000144972
PRPSAP1	963.9927994	0.282070027	0.062028862	4.547399703	5.43E-06	5.27E+00	0.000149095
CCL20	23.51753555	-1.172564539	0.258033721	-4.544229854	5.51E-06	5.26E+00	0.000150936
TCL1B	8.89931901	1.932711897	0.425300641	4.544342775	5.51E-06	5.26E+00	0.000150936
MYH11	1355.537636	0.865889973	0.190560141	4.543919669	5.52E-06	5.26E+00	0.000150949
FGF2	265.5719585	0.87176611	0.192055188	4.539143776	5.65E-06	5.25E+00	0.000154194
ZNF831	46.30175782	0.915754198	0.201771852	4.538562682	5.66E-06	5.25E+00	0.000154406
BPI	16.00480382	1.816913663	0.400358612	4.538215508	5.67E-06	5.25E+00	0.000154447
LOC201651	1.162292363	1.434162956	0.316102175	4.537023365	5.71E-06	5.24E+00	0.000155108
ACVR1	987.8586411	-0.268643487	0.059242275	-4.534658506	5.77E-06	5.24E+00	0.00015664
SDC1	7434.800366	-0.58084273	0.12827845	-4.527983701	5.95E-06	5.23E+00	0.000161446
PID1	117.0458226	-0.678124919	0.14979481	-4.52702547	5.98E-06	5.22E+00	0.000161957
NCDN	983.3730325	0.36966582	0.081667362	4.526481718	6E-06	5.22E+00	0.000162151
C6orf141	169.7993945	1.045181177	0.230928766	4.525989536	6.01E-06	5.22E+00	0.000162307
ADCY4	134.2423931	0.492963426	0.108978211	4.52350447	6.08E-06	5.22E+00	0.000164
SCT	7.90032738	-0.923820272	0.204261442	-4.522734499	6.1E-06	5.21E+00	0.000164373
OCA2	8.001342217	2.229440161	0.493222883	4.52014746	6.18E-06	5.21E+00	0.000166168
TBRG1	595.4453867	-0.252379565	0.055854372	-4.518528392	6.23E-06	5.21E+00	0.000167215
FZD1	1520.280864	-0.495374158	0.109694573	-4.515940425	6.3E-06	5.2E+00	0.00016904
FCRLB	114.9959411	1.120971091	0.248415843	4.512478254	6.41E-06	5.19E+00	0.000171591
CACNA1A	27.23642047	0.72083519	0.159945672	4.506750194	6.58E-06	5.18E+00	0.000176048
MED18	308.0954781	-0.233197949	0.051758233	-4.505523753	6.62E-06	5.18E+00	0.000176828
ZAP70	82.53641102	0.908480319	0.201675986	4.504652914	6.65E-06	5.18E+00	0.000177314
CBR3	275.4586499	-0.602050433	0.133743465	-4.501531606	6.75E-06	5.17E+00	0.000179695
RIN2	1998.182261	-0.373567684	0.08299928	-4.500854525	6.77E-06	5.17E+00	0.000180025
IGSF1	185.3474759	1.449982299	0.322302095	4.49882989	6.83E-06	5.17E+00	0.000181503
SPRY4	690.2440924	-0.36793755	0.081808893	-4.497525102	6.87E-06	5.16E+00	0.000182375
PGK1	9473.639747	-0.360335591	0.080126928	-4.497059859	6.89E-06	5.16E+00	0.000182528
YIPF5	1281.747394	-0.219136369	0.048754877	-4.494655326	6.97E-06	5.16E+00	0.000184355
ERBB2	15860.77885	-0.868708802	0.193296782	-4.49417106	6.98E-06	5.16E+00	0.000184528
ARHGAP26	502.4612169	-0.573977855	0.127727943	-4.493753221	7E-06	5.16E+00	0.000184643
CHST2	162.0728354	0.627802398	0.139752873	4.492232512	7.05E-06	5.15E+00	0.000185718
GZMK	174.8276433	0.940103141	0.209311417	4.491408794	7.08E-06	5.15E+00	0.000186189
SSTR1	9.156910999	0.916102792	0.204389648	4.482138901	7.39E-06	5.13E+00	0.000194206
S1PR4	36.37972844	0.783216638	0.174762496	4.481605937	7.41E-06	5.13E+00	0.000194432
NETO1	17.05795424	-1.164971461	0.26007316	-4.479399032	7.49E-06	5.13E+00	0.000196192
BTN1A1	3.157375087	1.406322275	0.314469201	4.472050909	7.75E-06	5.11E+00	0.000202788
PCOTH	39.33609202	-0.761999155	0.170449117	-4.470537422	7.8E-06	5.11E+00	0.000203957
CATSPER1	4.712459657	-0.74373742	0.166375705	-4.470228509	7.81E-06	5.11E+00	0.000203982
MORC4	812.4246656	-0.383084656	0.085747698	-4.467579491	7.91E-06	5.1E+00	0.00020625
CALM2	12818.1196	-0.255245182	0.05717227	-4.464492723	8.03E-06	5.1E+00	0.000208969
ANKRD46	625.6334044	0.402669979	0.090255056	4.461467284	8.14E-06	5.09E+00	0.000211662
SPOCK2	648.0019433	0.755807945	0.169426131	4.460988053	8.16E-06	5.09E+00	0.000211692
APLP1	281.0031965	1.011606739	0.226773254	4.460873243	8.16E-06	5.09E+00	0.000211692
BTLA	31.69099018	0.989320727	0.221986203	4.456676651	8.32E-06	5.08E+00	0.000215593
SEPX1	639.3477009	-0.398053198	0.089332151	-4.455878349	8.36E-06	5.08E+00	0.000216113
CALB2	234.0590253	1.090916928	0.245004503	4.45264031	8.48E-06	5.07E+00	0.000219111
TGFBR1	1914.643364	-0.437079059	0.098218733	-4.450058009	8.58E-06	5.07E+00	0.000221472
CRYAB	1161.028036	1.022410207	0.229894828	4.447295373	8.7E-06	5.06E+00	0.000224045
CHRNA9	11.66252851	1.726455459	0.38823092	4.44698083	8.71E-06	5.06E+00	0.000224081
MPHOSPH6	410.3742277	-0.467994813	0.105255567	-4.446271381	8.74E-06	5.06E+00	0.000224528
ALPL	312.7490343	0.687398548	0.154720785	4.442832593	8.88E-06	5.05E+00	0.000227851
PMEPA1	3302.975608	-0.485505498	0.10930118	-4.441905345	8.92E-06	5.05E+00	0.000228538
LACTB	444.0293833	-0.374525289	0.084326108	-4.441391855	8.94E-06	5.05E+00	0.000228787
KIRREL3	6.803324412	1.268762023	0.285878683	4.438113425	9.08E-06	5.04E+00	0.000231997
PLIN3	1709.914863	-0.266595638	0.060080237	-4.437326646	9.11E-06	5.04E+00	0.000232545
MBTD1	777.352882	0.395932903	0.089240911	4.436674818	9.14E-06	5.04E+00	0.000232948
DPY19L2P2	20.6697069	0.889170911	0.200514532	4.434446237	9.23E-06	5.03E+00	0.000235067
SOX2OT	5.51817311	1.093867213	0.24671526	4.433723367	9.26E-06	5.03E+00	0.000235552
WNT10B	9.33198783	0.818116208	0.184641655	4.430832306	9.39E-06	5.03E+00	0.000238425
MMRN2	695.8680623	0.439049721	0.099119913	4.429480516	9.45E-06	5.02E+00	0.000239616
MS4A7	1212.85898	-0.731633999	0.165219148	-4.428263952	9.5E-06	5.02E+00	0.000240661
AK3L1	356.7843619	-0.669432173	0.151200785	-4.427438489	9.54E-06	5.02E+00	0.000240964
FAM180B	3.290242102	1.212991886	0.273960945	4.427608781	9.53E-06	5.02E+00	0.000240964
TAS1R3	23.32401059	-0.896334103	0.20247747	-4.426833777	9.56E-06	5.02E+00	0.000241331
CRISP3	352.7214036	-1.69638231	0.383677673	-4.421373536	9.81E-06	5.01E+00	0.000247195
PTP4A3	541.2549485	0.453023157	0.10250216	4.419644966	9.89E-06	5E+00	0.000248863
YEATS4	431.8189167	0.349699339	0.079138037	4.418852826	9.92E-06	5E+00	0.000249458
KIAA1409	8.397148082	0.888976775	0.201242231	4.417446431	9.99E-06	5E+00	0.000250766
FXYD6	500.0805205	0.567222569	0.128471056	4.415177918	1.01E-05	5E+00	0.000253088
GPRASP1	133.5328804	0.523762825	0.118665401	4.413778756	1.02E-05	4.99E+00	0.000254406
TGIF2	887.2814401	0.418749637	0.09494722	4.410341229	1.03E-05	4.99E+00	0.000258151
CROT	707.4991389	-0.570939758	0.129465405	-4.409979325	1.03E-05	4.99E+00	0.000258255
XPR1	1491.860847	-0.356746382	0.080903295	-4.409540831	1.04E-05	4.98E+00	0.000258451
ABCG2	91.82094839	0.664484248	0.150720792	4.408709889	1.04E-05	4.98E+00	0.000259116
AZGP1	20949.53931	-0.824656189	0.187091585	-4.407767388	1.04E-05	4.98E+00	0.000259589
CCDC109A	587.2763431	-0.264078443	0.059911323	-4.407821942	1.04E-05	4.98E+00	0.000259589
TMEM88	22.83845012	0.524744984	0.119105405	4.405719335	1.05E-05	4.98E+00	0.000261724
REEP3	800.1539809	-0.31245139	0.07095164	-4.403723301	1.06E-05	4.97E+00	0.000263482
DHH	6.857561431	0.724284234	0.16446531	4.403872372	1.06E-05	4.97E+00	0.000263482
CHRNA1	32.14891627	-0.787610012	0.178925837	-4.401879711	1.07E-05	4.97E+00	0.000264936
NTAN1	635.3241847	-0.305695623	0.069449233	-4.401713431	1.07E-05	4.97E+00	0.000264936
CTSG	36.87939263	1.045061759	0.23741188	4.401893279	1.07E-05	4.97E+00	0.000264936
NR4A3	138.1117369	0.80287993	0.182619455	4.396464392	1.1E-05	4.96E+00	0.000271082
NPHS1	4.27886494	1.481203374	0.336958372	4.395805231	1.1E-05	4.96E+00	0.000271567
PANX2	96.3128461	0.785215553	0.178802945	4.391513522	1.13E-05	4.95E+00	0.000276639
APOBEC3B	302.2268787	0.775643464	0.176634612	4.391231453	1.13E-05	4.95E+00	0.000276653
TBC1D2	479.7939457	-0.33614294	0.076572821	-4.389846651	1.13E-05	4.95E+00	0.000278074
TC2N	3554.390844	-0.523894371	0.119351869	-4.389494475	1.14E-05	4.94E+00	0.000278179
IER5	756.4949601	-0.405467222	0.092409389	-4.387727532	1.15E-05	4.94E+00	0.000279753
RAB1A	4031.914268	-0.187759398	0.042790648	-4.387860578	1.14E-05	4.94E+00	0.000279753
NKPD1	14.48547656	0.702328538	0.160151872	4.385390742	1.16E-05	4.94E+00	0.000282423
ADAM32	39.0702786	1.02691763	0.234197194	4.384841734	1.16E-05	4.94E+00	0.000282786
NAT8L	68.00460898	0.834151446	0.190360506	4.381956438	1.18E-05	4.93E+00	0.000286205
DIRC3	13.39865099	-0.701915068	0.16027223	-4.379517705	1.19E-05	4.92E+00	0.000289069
PON2	1523.302525	-0.342321449	0.078193112	-4.377897754	1.2E-05	4.92E+00	0.000290642
JAG2	571.8516021	0.404480261	0.092393541	4.377797995	1.2E-05	4.92E+00	0.000290642
ENO1	17737.31387	-0.430434763	0.098350413	-4.376542504	1.21E-05	4.92E+00	0.000291603
ENTPD4	525.2228696	-0.351824456	0.080386127	-4.376681237	1.21E-05	4.92E+00	0.000291603
FTSJD2	1251.014832	0.224434859	0.051290155	4.375788244	1.21E-05	4.92E+00	0.000292255
ABCD2	26.64941155	0.806164445	0.184304551	4.37408865	1.22E-05	4.91E+00	0.00029418
RASGRP2	51.37260122	0.687137835	0.15716614	4.372047527	1.23E-05	4.91E+00	0.000296582
RASL10B	80.9462538	0.750918826	0.171783378	4.371312501	1.24E-05	4.91E+00	0.000297219
PPFIBP1	1434.417824	-0.378240823	0.086558842	-4.369753729	1.24E-05	4.91E+00	0.000298983
CASP10	232.1137763	-0.508366371	0.116358579	-4.36896337	1.25E-05	4.9E+00	0.000299337
SNX22	238.281368	0.535892977	0.12265339	4.369165632	1.25E-05	4.9E+00	0.000299337
ZNF37B	343.4815641	0.393765829	0.090147748	4.368005188	1.25E-05	4.9E+00	0.000300288
GOT1	967.4957185	-0.30342621	0.069483278	-4.366895417	1.26E-05	4.9E+00	0.000301451
BDNF	14.60859595	1.011857564	0.231989111	4.361659739	1.29E-05	4.89E+00	0.000308383
SOX3	1.82998817	2.591738794	0.594272815	4.361193596	1.29E-05	4.89E+00	0.000308666
LOC100302650	10.40810795	0.691509059	0.158644855	4.358849583	1.31E-05	4.88E+00	0.000311237
SFTPA1	3.258310366	3.759260052	0.862434935	4.358891203	1.31E-05	4.88E+00	0.000311237
KLK1	9.630263915	1.050059111	0.240938898	4.358196702	1.31E-05	4.88E+00	0.00031179
MYEOV	52.38939519	1.073344494	0.246310725	4.357684774	1.31E-05	4.88E+00	0.000312144
MLC1	17.7542598	1.134684956	0.260492715	4.355918189	1.33E-05	4.88E+00	0.000314293
EIF4E2	1423.510972	-0.184674947	0.042401032	-4.355435219	1.33E-05	4.88E+00	0.000314609
CUX2	39.21341408	-1.37690935	0.316206824	-4.35445805	1.33E-05	4.87E+00	0.000315458
GPSM1	300.5344204	0.457884856	0.105156489	4.354318623	1.33E-05	4.87E+00	0.000315458
C9orf84	4.435501801	-1.043959729	0.2398232	-4.353038946	1.34E-05	4.87E+00	0.000315788
ATG7	780.4205234	-0.183582825	0.042176314	-4.352747011	1.34E-05	4.87E+00	0.000315788
KLHL22	437.0558771	0.285953186	0.065698321	4.352518959	1.35E-05	4.87E+00	0.000315788
FAM134B	1015.320109	0.675541759	0.155188321	4.353045106	1.34E-05	4.87E+00	0.000315788
BTNL9	103.8248614	0.710034075	0.163091206	4.353601227	1.34E-05	4.87E+00	0.000315788
MEGF11	2.63376804	1.017834438	0.233818676	4.353092982	1.34E-05	4.87E+00	0.000315788
PPP1R16B	230.830883	0.643656587	0.148054072	4.347442645	1.38E-05	4.86E+00	0.000322799
FOSB	991.2310179	0.956749779	0.220103408	4.346819459	1.38E-05	4.86E+00	0.000323333
RNF157	143.0731609	0.706995246	0.162703474	4.345299016	1.39E-05	4.86E+00	0.000325194
COCH	135.343643	1.161399591	0.267475029	4.342086044	1.41E-05	4.85E+00	0.000329452
MUC2	206.4951202	2.574720362	0.592990907	4.341922161	1.41E-05	4.85E+00	0.000329452
ADRBK2	678.8853982	0.375442713	0.086525593	4.33909438	1.43E-05	4.84E+00	0.000332932
FADD	834.3922905	0.429906769	0.099075898	4.339166003	1.43E-05	4.84E+00	0.000332932
HORMAD1	49.65662473	2.348259573	0.541473293	4.33679667	1.45E-05	4.84E+00	0.000336033
RPRM	4.440183443	1.17659813	0.27133955	4.336257401	1.45E-05	4.84E+00	0.000336461
GPR144	1.099355547	2.587897615	0.597166793	4.333626122	1.47E-05	4.83E+00	0.000340109
AKT2	2530.095085	0.279462432	0.064517043	4.331606307	1.48E-05	4.83E+00	0.000342842
ADM	229.9934624	-0.76809212	0.1773464	-4.331027408	1.48E-05	4.83E+00	0.000343051
C19orf76	17.41249056	0.581489636	0.134271601	4.330697134	1.49E-05	4.83E+00	0.000343051
CIDEA	41.64754454	1.52854519	0.352944116	4.33084197	1.49E-05	4.83E+00	0.000343051
HTR6	1.336212178	1.616366724	0.373392325	4.328869705	1.5E-05	4.82E+00	0.000345505
LOC157381	4.83584302	-1.429833072	0.33039868	-4.327599231	1.51E-05	4.82E+00	0.000347097
CNOT6L	1319.203031	0.254205449	0.058748147	4.327037727	1.51E-05	4.82E+00	0.000347577
BCAT1	549.0484417	-0.565815473	0.1308225	-4.325062382	1.52E-05	4.82E+00	0.000350297
CD48	346.2708347	0.667243517	0.15429826	4.324374871	1.53E-05	4.82E+00	0.000350983
ATG4A	371.2807373	-0.239053223	0.055318852	-4.32136995	1.55E-05	4.81E+00	0.000355384
RCSD1	381.4042867	0.567497103	0.131378318	4.319564375	1.56E-05	4.81E+00	0.000357888
SLC25A27	55.30315074	0.765405626	0.177276672	4.317576696	1.58E-05	4.8E+00	0.000360706
HAUS2	555.8629222	-0.193171084	0.044772389	-4.314513659	1.6E-05	4.8E+00	0.000365319
CAPN9	194.9336986	-1.071292179	0.248555914	-4.310065125	1.63E-05	4.79E+00	0.000371884
NOTUM	8.923633702	1.008150367	0.233898708	4.310200671	1.63E-05	4.79E+00	0.000371884
LIMD2	347.0514415	0.586885935	0.136236027	4.307861494	1.65E-05	4.78E+00	0.000375174
SCD5	363.230082	0.695174057	0.161387212	4.307491584	1.65E-05	4.78E+00	0.000375368
IL19	7.489650383	1.651984913	0.383546767	4.307127721	1.65E-05	4.78E+00	0.000375553
GABPB2	162.4814636	-0.356987069	0.08293136	-4.30460887	1.67E-05	4.78E+00	0.000379414
NCR3	9.289839699	0.98021837	0.227737197	4.304164547	1.68E-05	4.78E+00	0.000379739
TNN	213.3185944	0.8747147	0.203253084	4.303574049	1.68E-05	4.77E+00	0.000380316
ITGA11	1786.197569	-0.695575196	0.161706383	-4.301470245	1.7E-05	4.77E+00	0.000383505
C2orf88	68.738009	0.765739595	0.178029993	4.301183082	1.7E-05	4.77E+00	0.000383563
RIMS4	849.4695392	1.149673028	0.267549399	4.297049562	1.73E-05	4.76E+00	0.000390336
CST9L	5.776772863	1.996109817	0.464574983	4.29663647	1.73E-05	4.76E+00	0.000390617
LOC150622	16.82216792	-1.900757127	0.442898793	-4.291628598	1.77E-05	4.75E+00	0.000399077
ATP1B2	43.95927515	0.578753616	0.134987654	4.287455937	1.81E-05	4.74E+00	0.000406181
MFSD7	322.6737048	-0.698296853	0.162891669	-4.286878855	1.81E-05	4.74E+00	0.000406534
IL13RA1	4531.244254	-0.29841336	0.069612847	-4.28675699	1.81E-05	4.74E+00	0.000406534
NES	1551.540859	0.580960046	0.135562686	4.285545415	1.82E-05	4.74E+00	0.000408291
GGTLC2	69.99612443	-0.840651564	0.196227594	-4.284063967	1.84E-05	4.74E+00	0.000410554
DACT2	8.720006727	1.19800926	0.27983667	4.281101762	1.86E-05	4.73E+00	0.000415587
TGM4	0.739858603	-1.475504882	0.34476522	-4.279738198	1.87E-05	4.73E+00	0.000417667
NAPSA	6.313275271	0.817683502	0.191098985	4.278847956	1.88E-05	4.73E+00	0.000418867
NEFH	159.6006431	0.931232555	0.217707093	4.277456198	1.89E-05	4.72E+00	0.000421017
FAM134C	2182.00097	0.259286948	0.060620702	4.27720133	1.89E-05	4.72E+00	0.000421023
LACRT	28.18365095	-4.20920504	0.984653282	-4.274809335	1.91E-05	4.72E+00	0.000425089
IL34	132.3630873	0.800649499	0.187329776	4.274010872	1.92E-05	4.72E+00	0.000426135
1-Sep	117.4390838	0.634583273	0.14856584	4.271394247	1.94E-05	4.71E+00	0.000430198
PLEKHB1	589.0193735	0.81345139	0.190431241	4.271627845	1.94E-05	4.71E+00	0.000430198
FCN1	44.22533019	0.926764531	0.217084046	4.269150812	1.96E-05	4.71E+00	0.000434059
SNPH	247.9232272	-0.84283962	0.197585376	-4.265698381	1.99E-05	4.7E+00	0.000440333
HBB	136.623275	0.790643973	0.185399998	4.264530646	2E-05	4.7E+00	0.000442146
RAB39B	81.55429513	0.864774211	0.202858484	4.262943276	2.02E-05	4.7E+00	0.000444802
USP27X	136.7883848	0.248733569	0.05836322	4.261820531	2.03E-05	4.69E+00	0.000446543
MUSTN1	26.59030557	0.640780152	0.150449186	4.259113436	2.05E-05	4.69E+00	0.000451481
ENTHD1	8.011011691	-0.906945686	0.212983329	-4.258294259	2.06E-05	4.69E+00	0.000452633
POP5	303.8421466	-0.280326826	0.065843998	-4.257439352	2.07E-05	4.68E+00	0.000453861
NTN5	5.395817398	0.675366021	0.158675025	4.256284311	2.08E-05	4.68E+00	0.000455703
AACS	1121.193211	-0.356662744	0.083886504	-4.251729769	2.12E-05	4.67E+00	0.000464555
NGFR	248.1254543	0.837272663	0.19698518	4.250434802	2.13E-05	4.67E+00	0.000466731
R3HDM2	1420.039473	0.214273008	0.050426921	4.249178928	2.15E-05	4.67E+00	0.000468835
VASH2	233.5413754	0.755850878	0.177904797	4.248625614	2.15E-05	4.67E+00	0.000469061
CA14	23.70434012	0.873643656	0.20563219	4.248574398	2.15E-05	4.67E+00	0.000469061
CANT1	3481.164932	0.375378031	0.088393836	4.246653949	2.17E-05	4.66E+00	0.000472575
PTGER2	101.3990883	0.79324835	0.186817341	4.246117338	2.18E-05	4.66E+00	0.000473185
EBF3	78.4379534	0.608296205	0.143354659	4.243295674	2.2E-05	4.66E+00	0.000478649
LY9	57.19042326	0.847023792	0.199680524	4.241894872	2.22E-05	4.65E+00	0.000481116
NAT8B	3.327696498	-0.772288389	0.18221954	-4.238230367	2.25E-05	4.65E+00	0.000488497
SCN3A	15.63827145	0.824457078	0.194545862	4.2378546	2.26E-05	4.65E+00	0.000488777
FOXC2	16.39434563	0.854544204	0.201700458	4.236699384	2.27E-05	4.64E+00	0.000490758
CPB2	1.246784442	-1.988861461	0.469626988	-4.234981191	2.29E-05	4.64E+00	0.000493443
SCN5A	8.836925654	0.901299745	0.212816561	4.235101534	2.28E-05	4.64E+00	0.000493443
P4HA2	1184.956268	-0.329585123	0.077833662	-4.234480501	2.29E-05	4.64E+00	0.000494002
C19orf38	27.17963791	0.587098896	0.138666495	4.233891501	2.3E-05	4.64E+00	0.000494604
LOC100133469	1.890503535	3.237455767	0.764684316	4.233715402	2.3E-05	4.64E+00	0.000494604
ZFYVE9	674.9458267	0.399348579	0.094408367	4.230012576	2.34E-05	4.63E+00	0.000502268
TPRKB	401.4891237	-0.253306322	0.059888319	-4.229644861	2.34E-05	4.63E+00	0.000502542
GIMAP1	87.34823519	0.539692896	0.127624654	4.2287511	2.35E-05	4.63E+00	0.000503993
C6orf223	13.92957716	-1.291123362	0.305454822	-4.226888134	2.37E-05	4.63E+00	0.00050763
TXNDC9	755.3189401	-0.213965898	0.050652626	-4.224181771	2.4E-05	4.62E+00	0.00051321
KRT4	42.50315883	2.084866547	0.493621961	4.223609793	2.4E-05	4.62E+00	0.000513957
TMEM45B	275.3726452	-0.932379418	0.220916791	-4.220500456	2.44E-05	4.61E+00	0.000520533
C7	405.4947052	1.105813011	0.262124559	4.218654724	2.46E-05	4.61E+00	0.000523946
ABCB5	7.346210361	1.117782785	0.264969175	4.218538946	2.46E-05	4.61E+00	0.000523946
CCKBR	6.970477295	2.076270892	0.492581782	4.215078524	2.5E-05	4.6E+00	0.00053147
FBXO24	10.11441362	-0.496047457	0.11775227	-4.212636056	2.52E-05	4.6E+00	0.000536672
PPL	1463.298424	-0.522106242	0.123962478	-4.211808705	2.53E-05	4.6E+00	0.000537483
TMPRSS5	5.800571075	1.015897982	0.241198866	4.211868817	2.53E-05	4.6E+00	0.000537483
VIL1	2.541587012	1.773251885	0.421308897	4.208911555	2.57E-05	4.59E+00	0.000543835
F13A1	1336.218384	-0.665048771	0.158032828	-4.208295069	2.57E-05	4.59E+00	0.000544734
C17orf100	44.10748292	0.395971214	0.094110981	4.207492138	2.58E-05	4.59E+00	0.000546086
CNTNAP3	44.7554841	0.932719351	0.22171842	4.206774303	2.59E-05	4.59E+00	0.000547236
LOXL2	1655.655329	-0.517654249	0.123121439	-4.204420084	2.62E-05	4.58E+00	0.00055237
SLC2A12	111.4623333	0.645042538	0.153441019	4.203846818	2.62E-05	4.58E+00	0.00055318
ISX	0.922350434	-2.78044895	0.661525952	-4.203083703	2.63E-05	4.58E+00	0.000554456
LOX	1216.136947	-0.544903991	0.129688165	-4.201647791	2.65E-05	4.58E+00	0.000557389
VDR	1078.256554	-0.31265408	0.074423715	-4.201000749	2.66E-05	4.58E+00	0.000557794
ANKRD29	57.73266451	0.686488056	0.163410099	4.201013647	2.66E-05	4.58E+00	0.000557794
RGS17	6.171125006	-0.505680274	0.120413646	-4.1995263	2.67E-05	4.57E+00	0.000560842
TRPV6	224.6574646	-1.083939347	0.258221979	-4.197703658	2.7E-05	4.57E+00	0.000564173
PLA1A	76.57441246	0.742434975	0.176861479	4.19783313	2.69E-05	4.57E+00	0.000564173
RGMA	325.7379697	0.816243535	0.194612338	4.1942024	2.74E-05	4.56E+00	0.00057235
LCT	13.60105295	-1.629240124	0.388483467	-4.193846751	2.74E-05	4.56E+00	0.000572641
IGHMBP2	361.0180955	0.372885315	0.088928702	4.193081724	2.75E-05	4.56E+00	0.000573968
PCDH9	23.50067536	0.809928709	0.193234901	4.191420412	2.77E-05	4.56E+00	0.000577577
DUSP6	1389.910117	-0.485512684	0.115907368	-4.188799132	2.8E-05	4.55E+00	0.000583671
DIRAS2	13.01611349	1.07894654	0.257730029	4.186343928	2.83E-05	4.55E+00	0.000589395
ITGB6	1953.927106	-0.852011555	0.203541674	-4.185931751	2.84E-05	4.55E+00	0.000589843
TCF7	353.4843031	0.580666319	0.138732557	4.185508654	2.85E-05	4.55E+00	0.000590321
PYY	12.49488608	1.592835713	0.38075448	4.183366959	2.87E-05	4.54E+00	0.000595286
MS4A14	157.2663995	-0.849263076	0.203213408	-4.179168517	2.93E-05	4.53E+00	0.000605745
PDE2A	151.1231454	0.554691846	0.13276191	4.178094786	2.94E-05	4.53E+00	0.000607972
NLRP9	2.871282537	0.810432708	0.194008041	4.177315046	2.95E-05	4.53E+00	0.000608782
IL24	17.73586078	0.979617598	0.234501549	4.17744618	2.95E-05	4.53E+00	0.000608782
COL10A1	3565.019506	-0.736226207	0.176354138	-4.174703321	2.98E-05	4.53E+00	0.000615164
CASQ1	26.77586807	0.979472048	0.234677114	4.173700757	3E-05	4.52E+00	0.000617233
ELOVL2	1022.516525	1.071083762	0.25673548	4.171935112	3.02E-05	4.52E+00	0.000621387
C14orf43	1336.192687	0.294074784	0.070543109	4.168724438	3.06E-05	4.51E+00	0.000629547
SHANK2	1044.897893	0.487055152	0.116846821	4.168321799	3.07E-05	4.51E+00	0.000630002
NME7	307.1126946	-0.291604221	0.069965134	-4.167850566	3.07E-05	4.51E+00	0.000630649
DIAPH1	3334.877439	-0.219120828	0.052580135	-4.167369072	3.08E-05	4.51E+00	0.000631325
NAPB	367.7647697	0.518753057	0.124558248	4.164742713	3.12E-05	4.51E+00	0.000637312
CD1C	43.84434626	0.891444848	0.214035792	4.164933528	3.11E-05	4.51E+00	0.000637312
OVCH2	1.471495852	1.700629425	0.408383299	4.164297193	3.12E-05	4.51E+00	0.000637895
IRS2	756.1746568	0.630536036	0.151447642	4.163392907	3.14E-05	4.5E+00	0.000639765
CDC42EP4	2105.501202	0.35405087	0.085047947	4.162956089	3.14E-05	4.5E+00	0.000640328
PNLIPRP3	4.600425235	-3.391546662	0.815084446	-4.160975809	3.17E-05	4.5E+00	0.000645239
DGAT2	738.1094128	0.71632195	0.172165912	4.160649129	3.17E-05	4.5E+00	0.000645496
STRN4	1594.603245	0.215553845	0.051822827	4.159438191	3.19E-05	4.5E+00	0.000648259
LRRC61	336.0212002	0.388688284	0.093488821	4.157591027	3.22E-05	4.49E+00	0.000652848
LONRF3	24.78732034	-0.722109446	0.173739845	-4.156268494	3.23E-05	4.49E+00	0.000655287
SDC4	6722.303568	0.395219865	0.095088173	4.15635144	3.23E-05	4.49E+00	0.000655287
MUC15	150.7918377	1.33907569	0.322241688	4.155501102	3.25E-05	4.49E+00	0.000656815
TNFRSF13C	6.130052441	0.905824087	0.218023847	4.15470188	3.26E-05	4.49E+00	0.000658439
ZFP42	3.851313731	2.575304549	0.619955081	4.154017974	3.27E-05	4.49E+00	0.000659735
SYT2	8.730112145	0.536646045	0.129202843	4.153515772	3.27E-05	4.48E+00	0.000660508
C12orf60	43.70750248	0.650826219	0.156851226	4.149321862	3.33E-05	4.48E+00	0.000672038
WFDC6	6.943048143	-1.924669869	0.463892191	-4.148959403	3.34E-05	4.48E+00	0.000672415
MAG	17.72066679	1.106200345	0.26664922	4.148522704	3.35E-05	4.48E+00	0.000673011
WT1	105.9199667	-1.261770165	0.304239186	-4.147296676	3.36E-05	4.47E+00	0.000675934
CGN	1767.534145	0.44698921	0.107808361	4.146146065	3.38E-05	4.47E+00	0.000678647
MT1M	27.86220305	0.754243614	0.182036058	4.143374783	3.42E-05	4.47E+00	0.000685507
MCOLN3	89.33907107	0.819024665	0.197665092	4.143496738	3.42E-05	4.47E+00	0.000685507
ESPNL	11.95921155	0.917596315	0.221589988	4.140964684	3.46E-05	4.46E+00	0.000692048
C17orf58	657.0211005	0.49185943	0.118808193	4.139945394	3.47E-05	4.46E+00	0.000694425
CD79B	90.03215027	0.769655276	0.186073294	4.136301655	3.53E-05	4.45E+00	0.000704824
EXTL1	71.30896102	0.882793999	0.213468172	4.135483002	3.54E-05	4.45E+00	0.000706625
TBC1D10C	98.9394155	0.718785731	0.173871247	4.134011486	3.56E-05	4.45E+00	0.000709731
VGF	17.51150466	1.176090938	0.284476337	4.134231158	3.56E-05	4.45E+00	0.000709731
TUBA4B	5.734298127	-1.96022627	0.474512705	-4.131030103	3.61E-05	4.44E+00	0.000718274
CLDN4	4879.723812	0.415113869	0.100503273	4.130351746	3.62E-05	4.44E+00	0.000719671
LGALS3	3305.719957	-0.45566461	0.11037063	-4.12849515	3.65E-05	4.44E+00	0.000724774
SLC35D3	3.307268429	-1.155137425	0.279833136	-4.12795082	3.66E-05	4.44E+00	0.000725761
DIO2	855.9769368	-0.716001251	0.173483114	-4.127210052	3.67E-05	4.44E+00	0.00072737
RPTOR	840.3266887	0.274613215	0.066544853	4.126738597	3.68E-05	4.43E+00	0.000728131
CCRL2	78.97479202	-0.464489946	0.112713225	-4.120988862	3.77E-05	4.42E+00	0.000745796
LOC728392	54.43016751	0.483764237	0.117417411	4.120038372	3.79E-05	4.42E+00	0.000748129
CD1D	36.90801402	0.49818463	0.120972711	4.1181571	3.82E-05	4.42E+00	0.000753507
SFTA1P	4.074590186	-0.778581892	0.189113272	-4.117013492	3.84E-05	4.42E+00	0.000756497
SIAE	888.8464573	-0.4386924	0.106583369	-4.115955467	3.86E-05	4.41E+00	0.000759217
RAB31	4552.573782	-0.524573258	0.127459177	-4.115617791	3.86E-05	4.41E+00	0.00075957
GGTLC1	3.690704897	-0.914207623	0.222158356	-4.115116984	3.87E-05	4.41E+00	0.000760231
CABP1	3.921936317	0.651481352	0.158320325	4.11495715	3.87E-05	4.41E+00	0.000760231
ROPN1L	21.10497277	-0.953090236	0.231714724	-4.113205328	3.9E-05	4.41E+00	0.000765264
REN	2.274059361	-1.089762436	0.265018253	-4.112027848	3.92E-05	4.41E+00	0.000768414
APOA1	5.396017403	1.156217851	0.281251578	4.110973737	3.94E-05	4.4E+00	0.000771164
RHOJ	163.427906	0.405838958	0.098730933	4.110555294	3.95E-05	4.4E+00	0.000771246
SERPINA5	1640.634091	1.036749694	0.252234423	4.11026251	3.95E-05	4.4E+00	0.000771246
TMEM213	24.44675941	1.465421274	0.356516417	4.110389322	3.95E-05	4.4E+00	0.000771246
TEK	283.6177745	0.464000096	0.113016535	4.105594796	4.03E-05	4.39E+00	0.000786208
MCF2L	1016.29179	0.397581539	0.096846364	4.105281008	4.04E-05	4.39E+00	0.000786498
CLTCL1	57.67376333	-0.589050787	0.143644433	-4.100756104	4.12E-05	4.39E+00	0.000800456
KIAA0748	42.41756251	0.752072034	0.183396839	4.100790598	4.12E-05	4.39E+00	0.000800456
C2orf54	305.5055346	-1.211082923	0.295381372	-4.100065335	4.13E-05	4.38E+00	0.000802058
CCNO	192.8681849	-0.996730046	0.243120918	-4.099729695	4.14E-05	4.38E+00	0.000802432
SV2B	47.61101367	0.690464602	0.168461113	4.098658667	4.16E-05	4.38E+00	0.000805361
SLC16A8	7.698696221	0.799462012	0.195333882	4.09279744	4.26E-05	4.37E+00	0.000825187
DNAH11	40.5493324	-1.348810344	0.329642748	-4.091733706	4.28E-05	4.37E+00	0.000827357
CXorf30	6.845366051	-1.320479733	0.322714347	-4.091791227	4.28E-05	4.37E+00	0.000827357
MYOM1	40.48382974	0.582870902	0.142467404	4.091257978	4.29E-05	4.37E+00	0.000828244
GIMAP5	301.9980116	0.539563681	0.1318981	4.090761589	4.3E-05	4.37E+00	0.000829207
MFI2	320.0522323	0.845700941	0.206809612	4.089272903	4.33E-05	4.36E+00	0.00083373
CNTFR	111.9299312	1.139712756	0.278754783	4.088585478	4.34E-05	4.36E+00	0.000835388
COL19A1	2.566916014	1.510434739	0.369448322	4.088351875	4.34E-05	4.36E+00	0.000835413
CDKN1C	220.1247691	0.514936882	0.126009653	4.086487597	4.38E-05	4.36E+00	0.000840511
INMT	80.3025967	0.648508416	0.158691776	4.086591197	4.38E-05	4.36E+00	0.000840511
PTPRN2	613.8389772	1.01583874	0.248651375	4.085393622	4.4E-05	4.36E+00	0.00084366
DCHS2	40.03252704	0.873025245	0.213803288	4.083310665	4.44E-05	4.35E+00	0.000850434
PRDM11	18.05774729	0.439102709	0.107552967	4.082664758	4.45E-05	4.35E+00	0.000851974
ITGAV	4272.744214	-0.341918039	0.083763155	-4.081962301	4.47E-05	4.35E+00	0.000853419
SCARB1	1614.496325	0.407046306	0.099721763	4.081820205	4.47E-05	4.35E+00	0.000853419
GPR182	1.338602682	0.984566767	0.241267202	4.080814791	4.49E-05	4.35E+00	0.00085629
FGFBP3	29.71109338	0.574318684	0.140768844	4.079870713	4.51E-05	4.35E+00	0.000858943
SERPINF2	70.43125131	0.616631409	0.151158869	4.079359758	4.52E-05	4.35E+00	0.000859172
DCT	1.454514316	1.61079057	0.394849018	4.07951013	4.51E-05	4.35E+00	0.000859172
MAP4K1	136.1642289	0.658414851	0.161423414	4.078806379	4.53E-05	4.34E+00	0.000860388
KCNH2	104.0555295	1.001841171	0.245670004	4.077995493	4.54E-05	4.34E+00	0.000862562
MAGEF1	1223.592812	0.312605944	0.076670858	4.077245944	4.56E-05	4.34E+00	0.000864514
MYOM3	20.49791263	0.620420675	0.152247482	4.075080052	4.6E-05	4.34E+00	0.00087176
GPR18	21.43078091	0.743751367	0.182595329	4.073222308	4.64E-05	4.33E+00	0.000877902
GPR173	22.25971828	0.677462225	0.166355625	4.072373414	4.65E-05	4.33E+00	0.000880263
STX19	15.92423819	-0.903199235	0.22189248	-4.07043643	4.69E-05	4.33E+00	0.000885067
MEIS1	166.8195514	-0.442852137	0.108793414	-4.070578553	4.69E-05	4.33E+00	0.000885067
LDHA	14897.35065	-0.320858217	0.078823147	-4.07060908	4.69E-05	4.33E+00	0.000885067
ZNF792	178.82175	0.25112918	0.061716328	4.069088187	4.72E-05	4.33E+00	0.000889352
DHRS3	882.4536431	0.431125586	0.105990863	4.067573121	4.75E-05	4.32E+00	0.000894298
C14orf4	1480.616582	0.303440606	0.07460433	4.067332366	4.76E-05	4.32E+00	0.000894367
IGFL3	4.801794855	-1.317472335	0.324276718	-4.06280273	4.85E-05	4.31E+00	0.00091017
PHLDB3	208.0396398	0.435137553	0.107098493	4.062966177	4.85E-05	4.31E+00	0.00091017
BARX1	15.15036874	1.250885957	0.307924494	4.062313918	4.86E-05	4.31E+00	0.000911211
CA6	3.934124915	2.677549942	0.659158593	4.062072419	4.86E-05	4.31E+00	0.000911287
RAMP2	469.7633823	0.478512324	0.117877816	4.059392522	4.92E-05	4.31E+00	0.000920933
ULBP2	27.11556103	-0.761684069	0.187677267	-4.05847806	4.94E-05	4.31E+00	0.000923669
SCGBL	1.840275327	-1.180173044	0.29083682	-4.057852931	4.95E-05	4.31E+00	0.000925267
RADIL	79.80221507	0.685740194	0.169052391	4.056376772	4.98E-05	4.3E+00	0.000929369
RASSF10	71.84086669	1.025480999	0.252794981	4.056571837	4.98E-05	4.3E+00	0.000929369
LGI1	6.516084909	2.265352605	0.558610779	4.055332779	5.01E-05	4.3E+00	0.000932648
CD40LG	32.49829999	0.827738123	0.204173767	4.054086554	5.03E-05	4.3E+00	0.000936748
DRD1	6.40895751	1.123856631	0.277279471	4.05315485	5.05E-05	4.3E+00	0.0009396
WFDC13	1.147379002	2.138156892	0.527625111	4.052416852	5.07E-05	4.3E+00	0.000941116
MYH7	1.869998349	2.766727413	0.682748582	4.052337106	5.07E-05	4.29E+00	0.000941116
HMGCLL1	36.83773594	1.037471766	0.256064423	4.051604486	5.09E-05	4.29E+00	0.00094318
PLCG2	427.4120548	0.498359231	0.123045974	4.050187227	5.12E-05	4.29E+00	0.000948019
GUCA1A	1.820368334	-0.855470342	0.211318335	-4.048254229	5.16E-05	4.29E+00	0.000954088
PLAG1	36.58638984	0.682599801	0.168606976	4.04846714	5.16E-05	4.29E+00	0.000954088
VCL	4126.306029	-0.302521981	0.074782961	-4.045333039	5.22E-05	4.28E+00	0.000965158
FABP7	221.4424395	-1.940465064	0.479976108	-4.042836786	5.28E-05	4.28E+00	0.000974582
NPY6R	2.911861917	1.408180296	0.348355548	4.042365063	5.29E-05	4.28E+00	0.000975631
QPCT	336.8144477	0.673425744	0.166614107	4.041829094	5.3E-05	4.28E+00	0.000976039
EMILIN3	21.3361333	0.971923808	0.24045427	4.042031807	5.3E-05	4.28E+00	0.000976039
FDFT1	2856.986112	-0.352893942	0.087338103	-4.040549673	5.33E-05	4.27E+00	0.000977727
FRS2	1771.840679	0.460369379	0.113934921	4.040634569	5.33E-05	4.27E+00	0.000977727
ABI3BP	527.3526639	0.746650287	0.184764446	4.041092887	5.32E-05	4.27E+00	0.000977727
IGF2BP3	24.85431917	0.845249704	0.209186891	4.040643748	5.33E-05	4.27E+00	0.000977727
NUP62	1760.227167	0.205892901	0.050990136	4.037896708	5.39E-05	4.27E+00	0.000987929
SPRY2	240.8636972	0.494836869	0.122589458	4.036536895	5.42E-05	4.27E+00	0.000992747
GPR183	257.5914939	0.58963877	0.146085652	4.036253809	5.43E-05	4.27E+00	0.000993023
MICAL2	2585.732704	-0.366919011	0.09092056	-4.03559999	5.45E-05	4.26E+00	0.00099487
GAB2	1080.208405	0.546156607	0.135374919	4.03440024	5.47E-05	4.26E+00	0.00099904
GPR55	17.7737406	0.875377298	0.217001377	4.033971166	5.48E-05	4.26E+00	0.000999942
NKAIN1	1100.60627	0.976074237	0.242006096	4.033263017	5.5E-05	4.26E+00	0.001002034
RHBG	14.55615888	0.923580823	0.229106668	4.031226298	5.55E-05	4.26E+00	0.001009825
S100P	1236.609365	-1.088713544	0.270133374	-4.03028151	5.57E-05	4.25E+00	0.001012957
HSD17B6	112.3105631	-0.463251859	0.11499703	-4.028381059	5.62E-05	4.25E+00	0.001020238
CD22	176.0704013	0.64588874	0.160438864	4.025762368	5.68E-05	4.25E+00	0.00103071
UPP1	155.8690106	-0.491678368	0.122177914	-4.024281893	5.71E-05	4.24E+00	0.001036261
CYP2C8	12.25516885	-1.03065652	0.256152913	-4.023598669	5.73E-05	4.24E+00	0.001038318
TNXB	500.8378948	0.719211243	0.178770125	4.023106459	5.74E-05	4.24E+00	0.001038582
BCL11B	143.3612836	0.736340074	0.183019399	4.023289765	5.74E-05	4.24E+00	0.001038582
PIP	5005.334307	-1.450080246	0.360485587	-4.022574823	5.76E-05	4.24E+00	0.001039975
RGL4	8.766479229	0.682842692	0.169773795	4.022073567	5.77E-05	4.24E+00	0.001041237
MYADM	4296.169457	0.335630282	0.083480895	4.020444203	5.81E-05	4.24E+00	0.001047506
ZNF841	283.6159481	-0.326222597	0.081160539	-4.019473043	5.83E-05	4.23E+00	0.001049912
KDELC2	1007.546522	-0.297312036	0.073965632	-4.01959707	5.83E-05	4.23E+00	0.001049912
KLHL23	148.8774173	0.445494362	0.110864547	4.018366315	5.86E-05	4.23E+00	0.001053892
C14orf147	1784.257527	-0.38586393	0.096034848	-4.017957403	5.87E-05	4.23E+00	0.00105476
C17orf39	359.4009425	0.260350325	0.064809537	4.017160707	5.89E-05	4.23E+00	0.001057367
FCGR2C	95.25444198	-0.518590498	0.129137062	-4.015814606	5.92E-05	4.23E+00	0.001062454
FGFBP2	13.46174989	1.028750147	0.256209974	4.015261896	5.94E-05	4.23E+00	0.001063978
C20orf203	1.839542659	0.947960865	0.236141137	4.014382578	5.96E-05	4.22E+00	0.001066982
KLC2	742.7979812	0.350358567	0.087325148	4.01211534	6.02E-05	4.22E+00	0.001076307
TRAF3IP3	159.4364152	0.589242927	0.146934523	4.010241547	6.07E-05	4.22E+00	0.001083901
DIRAS3	56.41169309	-0.833974175	0.208026061	-4.008988931	6.1E-05	4.21E+00	0.001087931
EPHA8	18.78677896	1.258860588	0.314013529	4.008937425	6.1E-05	4.21E+00	0.001087931
SLC22A18AS	20.57438838	-0.706625005	0.1762845	-4.00843525	6.11E-05	4.21E+00	0.001089261
P2RY1	23.21309841	-0.530375373	0.132335426	-4.007810991	6.13E-05	4.21E+00	0.001090172
MAP3K10	180.2301874	0.331568474	0.082727865	4.007941887	6.13E-05	4.21E+00	0.001090172
KCNAB1	78.51315292	0.520455918	0.129876399	4.007317135	6.14E-05	4.21E+00	0.001091468
TRAT1	34.97139827	0.876168733	0.21871727	4.005942154	6.18E-05	4.21E+00	0.001096848
CXorf22	5.064971262	-1.115648793	0.278550365	-4.005195939	6.2E-05	4.21E+00	0.001097351
PRKCQ	48.6687482	0.786308435	0.196303514	4.005574937	6.19E-05	4.21E+00	0.001097351
PYHIN1	44.22258314	0.817759103	0.204173449	4.00521766	6.2E-05	4.21E+00	0.001097351
DNM1P35	16.56178748	0.536323793	0.133950879	4.003884082	6.23E-05	4.21E+00	0.001102467
GDF5	20.78000105	1.103755027	0.275706653	4.003367401	6.24E-05	4.2E+00	0.001103887
KIAA1467	2306.375697	0.715326073	0.178710787	4.002702274	6.26E-05	4.2E+00	0.001106005
PGAP3	1516.504106	-0.643762382	0.160846034	-4.002351614	6.27E-05	4.2E+00	0.001106654
CRHBP	7.301492442	0.663109984	0.165689594	4.002122088	6.28E-05	4.2E+00	0.001106737
PRKCG	1.452810119	1.58074654	0.395062359	4.001258288	6.3E-05	4.2E+00	0.001109793
BRD1	833.4799434	0.204516148	0.051116432	4.000986398	6.31E-05	4.2E+00	0.001110077
MTCP1	29.01697491	-0.36405396	0.091014291	-3.999964789	6.34E-05	4.2E+00	0.001113886
5-Sep	587.4985743	0.443022859	0.110766549	3.999608742	6.34E-05	4.2E+00	0.001114569
MMP12	159.7091238	-1.229740126	0.30751163	-3.999003633	6.36E-05	4.2E+00	0.001116427
SRC	1236.833346	0.362425084	0.090641092	3.998463351	6.38E-05	4.2E+00	0.001117982
UBE2J1	2094.796154	-0.261103187	0.065325352	-3.996965622	6.42E-05	4.19E+00	0.001124076
FAM149A	52.23940947	0.569119208	0.142403359	3.99652938	6.43E-05	4.19E+00	0.001125149
SMYD3	520.0521935	-0.429590752	0.10751328	-3.995699424	6.45E-05	4.19E+00	0.001128096
MARK4	825.0802442	0.281728182	0.070534947	3.994164514	6.49E-05	4.19E+00	0.001134422
MIPOL1	220.4335823	-0.426613296	0.106846127	-3.992782034	6.53E-05	4.19E+00	0.001140048
TNIK	454.3950445	-0.678743131	0.170039346	-3.991682781	6.56E-05	4.18E+00	0.001144333
SIX3	21.23522135	1.337937776	0.335232076	3.991079234	6.58E-05	4.18E+00	0.001146235
RGR	2.317578473	2.699853204	0.676580933	3.990436433	6.6E-05	4.18E+00	0.001148331
RFX6	4.53454416	1.865083075	0.467416139	3.990198283	6.6E-05	4.18E+00	0.00114847
GMPR	201.3391337	0.580791477	0.145579898	3.989503254	6.62E-05	4.18E+00	0.001150824
PRPS1	912.8208326	-0.291523372	0.073113008	-3.987298323	6.68E-05	4.18E+00	0.001160324
CCDC6	3220.387489	-0.269438064	0.067576868	-3.987134541	6.69E-05	4.17E+00	0.001160324
AKAP7	131.3663264	0.341968927	0.085836962	3.983935592	6.78E-05	4.17E+00	0.001175029
GBP6	21.57465671	0.909614769	0.22839197	3.982691554	6.81E-05	4.17E+00	0.001180161
ZP1	4.993855412	-1.264775506	0.317676217	-3.981335203	6.85E-05	4.16E+00	0.001185874
PPP1R7	1149.110404	-0.188510466	0.047351064	-3.98112422	6.86E-05	4.16E+00	0.001185887
VWA5A	773.8353098	-0.512857594	0.128856116	-3.980079569	6.89E-05	4.16E+00	0.001190066
UCKL1	526.1398332	0.31405325	0.078928247	3.978971576	6.92E-05	4.16E+00	0.001194578
BCORL1	480.0837625	0.309851823	0.077906287	3.977237716	6.97E-05	4.16E+00	0.001202266
ARPC2	4555.121989	-0.198060214	0.049811543	-3.976191124	7E-05	4.15E+00	0.001206511
ZNF233	65.4679723	0.467130324	0.117615638	3.971668493	7.14E-05	4.15E+00	0.001228578
PCDHGA7	39.17189241	0.815648556	0.205401751	3.970991248	7.16E-05	4.15E+00	0.001230108
PENK	9.638951025	1.074500776	0.270593838	3.970898914	7.16E-05	4.15E+00	0.001230108
IGFN1	3.911801096	1.214137368	0.305770377	3.97074883	7.16E-05	4.14E+00	0.001230108
PLD6	169.8924367	0.42305565	0.106578508	3.969427392	7.2E-05	4.14E+00	0.001235873
SESN2	392.5155832	-0.315880365	0.079616539	-3.967521941	7.26E-05	4.14E+00	0.001244709
FBN2	241.8865791	-0.821597746	0.207118008	-3.96680981	7.28E-05	4.14E+00	0.001247348
C5orf20	23.03450096	0.878924912	0.22161243	3.96604519	7.31E-05	4.14E+00	0.001250268
GMPPA	783.5820354	-0.237762522	0.059983032	-3.963829671	7.38E-05	4.13E+00	0.00126084
GLRX	644.5395886	-0.464412618	0.117202571	-3.962478067	7.42E-05	4.13E+00	0.001264711
SLC39A14	1567.645827	-0.352938069	0.089065014	-3.962701531	7.41E-05	4.13E+00	0.001264711
AMY1A	26.35237852	1.391677034	0.351199904	3.962635003	7.41E-05	4.13E+00	0.001264711
HMGN4	1683.786614	0.244998554	0.061838357	3.961918902	7.43E-05	4.13E+00	0.001266581
EFNA3	482.6764506	-0.62352476	0.157393978	-3.961554097	7.45E-05	4.13E+00	0.001267072
LEMD1	9.805422868	1.780527573	0.449467673	3.961414089	7.45E-05	4.13E+00	0.001267072
ZNF521	554.5764119	0.538658143	0.136003767	3.960611941	7.48E-05	4.13E+00	0.001269146
PCDH19	202.6244785	0.837198859	0.211375449	3.960719477	7.47E-05	4.13E+00	0.001269146
FBXO31	516.1683975	0.216619454	0.054703701	3.959868358	7.5E-05	4.12E+00	0.001272009
ADORA3	201.8917904	-0.440514742	0.111273803	-3.958836026	7.53E-05	4.12E+00	0.00127642
TSPAN2	174.808345	0.515611256	0.130286713	3.957512204	7.57E-05	4.12E+00	0.00128241
PPAP2A	732.1807798	0.344945253	0.087231103	3.954383719	7.67E-05	4.12E+00	0.00129819
LCK	197.2441019	0.731368414	0.185020065	3.952914052	7.72E-05	4.11E+00	0.001305072
MGC70857	421.7084975	0.40831454	0.103325616	3.951726172	7.76E-05	4.11E+00	0.001310445
DACH2	3.019042776	1.124462216	0.284606837	3.950931846	7.78E-05	4.11E+00	0.001313676
ST8SIA1	134.7915038	0.728253399	0.184381601	3.949707539	7.82E-05	4.11E+00	0.001319284
CDCP1	1328.577972	-0.473133356	0.119797683	-3.949436623	7.83E-05	4.11E+00	0.001319649
LOC284749	7.804889077	1.011766868	0.256212893	3.948930337	7.85E-05	4.11E+00	0.001321314
CAPN8	378.1659366	-1.030532242	0.26101447	-3.948180509	7.87E-05	4.1E+00	0.001324327
HPCAL1	700.7129432	-0.33540088	0.084980864	-3.94678124	7.92E-05	4.1E+00	0.001328721
FLJ10661	21.31490332	0.567401246	0.143763258	3.946775101	7.92E-05	4.1E+00	0.001328721
PAX5	12.59046059	1.260902806	0.319472801	3.946823642	7.92E-05	4.1E+00	0.001328721
FAM177B	15.26212124	-1.185913152	0.300556843	-3.94572002	7.96E-05	4.1E+00	0.001333451
PLCD4	191.0522204	0.516895218	0.131012641	3.945384318	7.97E-05	4.1E+00	0.001334186
MKX	140.2996694	-1.137072026	0.288221333	-3.945134845	7.98E-05	4.1E+00	0.001334442
CNGB3	1.136256806	1.979831137	0.502014275	3.943774582	8.02E-05	4.1E+00	0.0013409
HSF5	2.25734919	0.870122148	0.220647947	3.943486264	8.03E-05	4.1E+00	0.001341376
MKNK2	3391.513517	-0.326891265	0.082908858	-3.942778545	8.05E-05	4.09E+00	0.001344202
C16orf54	81.31597213	0.675906266	0.171475202	3.941714367	8.09E-05	4.09E+00	0.001349039
ZNF703	855.6161342	0.669008249	0.169737536	3.941427834	8.1E-05	4.09E+00	0.00134951
RBM45	203.838155	-0.124005551	0.031466951	-3.94081881	8.12E-05	4.09E+00	0.001351799
CSTA	267.0778863	-0.877866053	0.222849957	-3.939269569	8.17E-05	4.09E+00	0.001358263
NUDT15	455.6424752	-0.293035626	0.07438635	-3.939373642	8.17E-05	4.09E+00	0.001358263
DSG3	321.7824156	1.234597965	0.313612124	3.93670356	8.26E-05	4.08E+00	0.001371706
MAGEB2	1.194831357	-2.955051202	0.750718149	-3.93629914	8.27E-05	4.08E+00	0.001372862
CA4	7.477317747	1.70780209	0.433923624	3.935720474	8.29E-05	4.08E+00	0.001375017
DLGAP1	65.97808785	1.077404666	0.273794304	3.935087955	8.32E-05	4.08E+00	0.001377484
VEGFC	199.178191	-0.385200352	0.097941677	-3.932956465	8.39E-05	4.08E+00	0.001387429
MAPK12	126.4679403	0.535625237	0.136186665	3.933022643	8.39E-05	4.08E+00	0.001387429
IL20RB	15.34174041	-0.59344862	0.150908532	-3.932505434	8.41E-05	4.08E+00	0.001388871
ST6GALNAC1	29.2645317	-0.977937863	0.24875693	-3.931298972	8.45E-05	4.07E+00	0.001394691
CLDN10	9.037843037	1.336091188	0.339912184	3.930695188	8.47E-05	4.07E+00	0.001397028
AKNAD1	2.633547932	-0.687262291	0.174891461	-3.929650341	8.51E-05	4.07E+00	0.001401939
PPFIA1	2028.871487	0.401703265	0.102255979	3.928408568	8.55E-05	4.07E+00	0.001408019
FAM65C	95.88488945	0.724687135	0.184483453	3.928195843	8.56E-05	4.07E+00	0.001408089
GRIA3	21.71243685	-0.732698233	0.186603348	-3.926501003	8.62E-05	4.06E+00	0.001416259
FLJ10038	225.2220479	0.335084491	0.085341351	3.926402455	8.62E-05	4.06E+00	0.001416259
CPA5	2.029101499	-1.135735525	0.289342343	-3.925230961	8.66E-05	4.06E+00	0.001420802
CMA1	8.0205694	1.195633822	0.30459616	3.925308259	8.66E-05	4.06E+00	0.001420802
CCND1	12153.94862	0.597199049	0.152160942	3.924785442	8.68E-05	4.06E+00	0.001421069
IL17B	7.636556033	1.128549796	0.28754247	3.92481082	8.68E-05	4.06E+00	0.001421069
SLC38A11	6.744813099	-0.82394179	0.21001963	-3.923165605	8.74E-05	4.06E+00	0.001429474
ZNF543	168.4265257	0.277886467	0.070846479	3.922375141	8.77E-05	4.06E+00	0.001432985
ZNF202	240.6102316	-0.22905788	0.05840158	-3.922117882	8.78E-05	4.06E+00	0.001433327
CD5	157.3307748	0.735476593	0.187533849	3.921833823	8.79E-05	4.06E+00	0.001433831
FUT3	117.2026797	-1.092469185	0.278680516	-3.920149139	8.85E-05	4.05E+00	0.001441198
RSPH4A	26.64064664	-0.772565955	0.197072947	-3.920202991	8.85E-05	4.05E+00	0.001441198
NIPAL2	273.7257752	-0.509844722	0.13006594	-3.919894181	8.86E-05	4.05E+00	0.001441198
TMEM101	757.0538399	0.505936005	0.129078363	3.91960351	8.87E-05	4.05E+00	0.001441198
REM1	25.25121882	0.617540864	0.157548049	3.919698579	8.87E-05	4.05E+00	0.001441198
MUC20	260.4606191	-0.742077453	0.189337951	-3.919327588	8.88E-05	4.05E+00	0.001441661
PPP2R2B	16.1826434	0.644321208	0.16444056	3.918262069	8.92E-05	4.05E+00	0.001446855
ACOT6	4.490488471	-0.760607722	0.194166353	-3.917299326	8.95E-05	4.05E+00	0.001451449
TLL2	20.81598444	-0.705554786	0.18015346	-3.91640986	8.99E-05	4.05E+00	0.001455615
CD177	113.5505293	-1.308629472	0.334213906	-3.915544648	9.02E-05	4.04E+00	0.001459646
SCN4B	170.6877234	0.561488163	0.143472167	3.913568557	9.09E-05	4.04E+00	0.001470441
ZNF259	653.7411641	-0.253577234	0.064813586	-3.912408623	9.14E-05	4.04E+00	0.001476313
GTSF1	9.243481477	1.11381541	0.284772267	3.91124958	9.18E-05	4.04E+00	0.001482202
ATP6V0D2	36.58558464	-0.76585572	0.195899626	-3.909429203	9.25E-05	4.03E+00	0.001492193
PSMD6	1250.4645	-0.196544642	0.0502783	-3.909134613	9.26E-05	4.03E+00	0.001492792
TSNARE1	215.6261211	0.392990553	0.100538222	3.90886713	9.27E-05	4.03E+00	0.001493225
S100A7	721.4761048	-2.076004046	0.531340904	-3.907103763	9.34E-05	4.03E+00	0.001502563
EGFL6	111.4777908	-0.756558387	0.193643457	-3.906965912	9.35E-05	4.03E+00	0.001502563
ACTN2	29.08861082	1.254298349	0.321084832	3.906439126	9.37E-05	4.03E+00	0.001504614
SLC2A5	107.2442002	-0.687656713	0.176202931	-3.902640593	9.51E-05	4.02E+00	0.001527187
IDH1	2757.689628	-0.390293024	0.100021896	-3.90207583	9.54E-05	4.02E+00	0.00152951
LOC400940	2.753012448	-1.620337481	0.415273835	-3.901853054	9.55E-05	4.02E+00	0.001529674
USH1C	3.289577528	1.441996381	0.369764599	3.899768618	9.63E-05	4.02E+00	0.00154165
AFMID	633.0254436	-0.382501733	0.098134038	-3.897747835	9.71E-05	4.01E+00	0.001552046
RLTPR	63.13706943	0.822226591	0.210942038	3.897879244	9.7E-05	4.01E+00	0.001552046
C2orf49	138.8151283	-0.191540782	0.049160122	-3.896263392	9.77E-05	4.01E+00	0.001560319
C1QTNF3	620.3183042	-0.681490409	0.174925352	-3.895892735	9.78E-05	4.01E+00	0.001561442
C14orf129	640.7674046	-0.228335241	0.05861901	-3.895242181	9.81E-05	4.01E+00	0.001564372
B3GNT8	74.89280856	0.472116112	0.121227064	3.894477835	9.84E-05	4.01E+00	0.001567508
C1orf95	59.22370923	1.045409243	0.268441528	3.894364816	9.85E-05	4.01E+00	0.001567508
C19orf59	6.355132153	-0.889406288	0.228532098	-3.891822186	9.95E-05	4E+00	0.001582752
GSTA1	49.54268334	1.638811264	0.421275365	3.890118915	0.000100195	4E+00	0.001592617
LOC541471	248.6675375	-0.342543608	0.088112921	-3.887552496	0.00010126	3.99E+00	0.001608249
NPAS3	53.99903591	0.612728896	0.157764406	3.88382215	0.000102827	3.99E+00	0.001631822
CLEC17A	6.74528014	1.045468639	0.269251347	3.882872457	0.00010323	3.99E+00	0.001636893
SPARCL1	5860.009271	0.460026938	0.118488307	3.882466975	0.000103402	3.99E+00	0.001638308
PPIC	1071.500727	-0.316236988	0.081464453	-3.881901556	0.000103643	3.98E+00	0.001640803
B3GNT1	509.4735052	0.326407841	0.084116883	3.880408179	0.000104281	3.98E+00	0.001649586
C1QTNF2	30.23136353	-0.62209022	0.160361482	-3.879299512	0.000104758	3.98E+00	0.001655793
LPL	934.4836941	0.767562322	0.198094839	3.874721448	0.000106747	3.97E+00	0.00168588
TCN1	222.3102269	1.325925792	0.342310055	3.873464342	0.000107299	3.97E+00	0.001693247
MIA2	1.34413524	2.092584629	0.540325399	3.872822994	0.000107582	3.97E+00	0.001696352
EPHA7	40.14747926	0.983693935	0.254019246	3.872517335	0.000107717	3.97E+00	0.001697124
ADAM15	4468.721116	-0.382206833	0.098714698	-3.871833066	0.00010802	3.97E+00	0.00169918
TSHZ2	113.9730786	0.566714329	0.146362168	3.872000096	0.000107946	3.97E+00	0.00169918
ABHD6	149.8369496	-0.377149509	0.097469804	-3.869398448	0.000109104	3.96E+00	0.001714868
TLE1	829.4338746	-0.502651331	0.129926263	-3.868743067	0.000109398	3.96E+00	0.001718113
HOXA13	5.574019267	-1.055986005	0.273044595	-3.867448851	0.00010998	3.96E+00	0.0017204
NRK	145.597365	-0.819599264	0.211893215	-3.867982573	0.00010974	3.96E+00	0.0017204
GATS	133.5100519	0.369092851	0.095432658	3.867573824	0.000109924	3.96E+00	0.0017204
PEG3	858.3433529	0.991617401	0.256381657	3.867739268	0.000109849	3.96E+00	0.0017204
SPANXB2	3.909895875	2.828276544	0.731297124	3.867479376	0.000109966	3.96E+00	0.0017204
TTC12	314.454326	-0.395900171	0.102403401	-3.866084208	0.000110597	3.96E+00	0.00172594
BLZF1	890.8956986	-0.234394587	0.060627798	-3.866124032	0.000110579	3.96E+00	0.00172594
WWP1	4821.630891	0.483965366	0.1251785	3.866201985	0.000110543	3.96E+00	0.00172594
KCNQ2	1.601826041	2.427639563	0.628343422	3.863555308	0.000111749	3.95E+00	0.001742535
SERPINB8	247.7196862	-0.368434823	0.095367685	-3.86330887	0.000111861	3.95E+00	0.001742916
MTL5	663.3635409	0.482932119	0.125105408	3.860201794	0.000113293	3.95E+00	0.001763834
SLC31A1	1643.888677	-0.278158444	0.07207587	-3.859245022	0.000113738	3.94E+00	0.001769355
BCL2	2060.615844	0.581162926	0.150657152	3.857519672	0.000114543	3.94E+00	0.001780482
LOC342346	1.897901168	0.802092825	0.20801553	3.855927597	0.000115292	3.94E+00	0.001790699
ELN	2128.235615	0.74453955	0.193120183	3.855317125	0.00011558	3.94E+00	0.001793761
ADCY3	968.5560039	0.364775585	0.094621279	3.855111533	0.000115677	3.94E+00	0.001793856
LOC100133669	15.6061908	0.785446252	0.203782502	3.854336086	0.000116044	3.94E+00	0.001798136
PLA2G5	16.06974214	-0.612399236	0.158945843	-3.852879848	0.000116737	3.93E+00	0.001807447
FOXO4	450.2832924	0.297655004	0.077272335	3.852025478	0.000117145	3.93E+00	0.001810921
SMYD1	16.34218702	1.270483992	0.329818701	3.852067779	0.000117125	3.93E+00	0.001810921
ADD2	57.58019379	0.752787552	0.195443849	3.851681988	0.000117309	3.93E+00	0.001812043
SMTNL2	7.115346945	1.011478631	0.26273618	3.849788147	0.00011822	3.93E+00	0.00182468
THBS2	8533.28314	-0.539966769	0.140363279	-3.846923313	0.00011961	3.92E+00	0.001844695
HERC4	1022.157759	-0.21963204	0.057101628	-3.846335895	0.000119897	3.92E+00	0.001847676
PI16	169.8208156	1.149309573	0.29884681	3.845815094	0.000120152	3.92E+00	0.001850158
CD8A	290.4715215	0.685942425	0.178374821	3.845511493	0.000120301	3.92E+00	0.001851005
ATG2A	686.4001086	0.287663389	0.07482638	3.844411421	0.000120842	3.92E+00	0.001857877
USP35	254.8631045	0.485947217	0.126636889	3.837327497	0.000124381	3.91E+00	0.001910788
RAET1G	8.294068269	-0.721411734	0.188139447	-3.834452299	0.000125844	3.9E+00	0.00193177
MYLK3	12.48072527	-0.801853619	0.209148336	-3.833899112	0.000126128	3.9E+00	0.001934615
S100A2	199.1984075	-1.038180836	0.270866581	-3.832812562	0.000126686	3.9E+00	0.001940226
RGPD1	454.5747047	-0.508799258	0.132748549	-3.832804655	0.000126691	3.9E+00	0.001940226
LRRC24	22.06468676	0.652995884	0.170546894	3.828834799	0.000128751	3.89E+00	0.001970256
MMP20	1.763299052	2.217321128	0.579266923	3.827805526	0.000129291	3.89E+00	0.001976976
TMC8	248.3980259	0.540374787	0.141205608	3.826864923	0.000129786	3.89E+00	0.001983005
EPHX4	77.5286213	0.860604568	0.224953335	3.825702642	0.0001304	3.88E+00	0.001990842
FBLN7	190.2752497	0.440201478	0.11508168	3.825122107	0.000130707	3.88E+00	0.001993994
ICAM2	244.7785963	0.394434485	0.103146238	3.824031728	0.000131287	3.88E+00	0.001999937
CD3E	353.5168844	0.725185017	0.189640048	3.824007763	0.0001313	3.88E+00	0.001999937
FUT9	68.05647117	-1.044837901	0.273644588	-3.818229728	0.000134413	3.87E+00	0.002044194
SLAIN2	1570.224652	-0.192109416	0.050312144	-3.818350857	0.000134347	3.87E+00	0.002044194
GRASP	72.51782057	0.396699733	0.103915499	3.817522294	0.000134799	3.87E+00	0.002048482
NTRK2	1361.973937	0.844115387	0.221137359	3.817154152	0.000135	3.87E+00	0.002049959
VIT	38.89317411	0.851128396	0.223087845	3.815216357	0.000136064	3.87E+00	0.002064523
SULT1C2	17.17322209	-0.920050418	0.241166611	-3.814999163	0.000136183	3.87E+00	0.00206475
SCN3B	25.8915022	0.734735125	0.192766676	3.811525634	0.000138112	3.86E+00	0.002092377
C12orf45	173.1735601	-0.284963117	0.074767367	-3.811330124	0.000138221	3.86E+00	0.002092424
BMP6	74.32472812	0.540652893	0.141925862	3.809403617	0.000139302	3.86E+00	0.002107176
SH2D1A	81.0583431	0.788116575	0.206907778	3.809023426	0.000139517	3.86E+00	0.0021088
LIFR	812.7379961	0.523853171	0.13757139	3.807864197	0.000140172	3.85E+00	0.002117084
HCST	125.6757945	0.541349761	0.142204147	3.806849329	0.000140748	3.85E+00	0.002124159
LOC646762	400.2228091	0.406257299	0.106740176	3.806039256	0.00014121	3.85E+00	0.002129494
KIAA1539	448.6592205	-0.272425514	0.071635522	-3.802938915	0.00014299	3.84E+00	0.002154683
C16orf45	622.6659438	-0.645757491	0.169844135	-3.802059413	0.000143498	3.84E+00	0.002160696
USHBP1	28.09428828	0.448339937	0.117966165	3.800580758	0.000144357	3.84E+00	0.002170315
THEMIS	47.38640755	0.759025263	0.199710801	3.800621987	0.000144333	3.84E+00	0.002170315
SNX32	4.174496799	1.056852465	0.278239491	3.798355363	0.000145659	3.84E+00	0.002188221
LOC440925	22.47157977	-0.967563212	0.254855533	-3.796516399	0.000146744	3.83E+00	0.002202831
ADRA1A	2.565074101	1.05157761	0.277005582	3.796232568	0.000146912	3.83E+00	0.002203675
LUM	17439.34822	-0.522795419	0.137768667	-3.794733825	0.000147802	3.83E+00	0.002211979
MXD1	612.738395	-0.356472939	0.093933892	-3.794934184	0.000147683	3.83E+00	0.002211979
KLHL32	8.318925562	0.661405169	0.17429535	3.794737894	0.0001478	3.83E+00	0.002211979
MPPED2	76.25631725	0.708643641	0.186819956	3.793190276	0.000148724	3.83E+00	0.002224091
GLYATL1	153.2554092	-0.954756783	0.251723071	-3.79288549	0.000148907	3.83E+00	0.002225135
THY1	3692.796324	-0.401892919	0.106019355	-3.790750457	0.000150193	3.82E+00	0.002242652
SP5	40.89647411	-1.098114187	0.289781804	-3.789451828	0.00015098	3.82E+00	0.002249295
ABCC11	1286.256398	-1.064569705	0.280913234	-3.789674448	0.000150845	3.82E+00	0.002249295
RPPH1	22.66864034	0.632736076	0.166967519	3.78957583	0.000150905	3.82E+00	0.002249295
CD247	102.9117553	0.686562127	0.181219683	3.78856267	0.000151521	3.82E+00	0.002255654
SH2D4A	440.0967849	-0.545124672	0.143905851	-3.78806469	0.000151825	3.82E+00	0.002257288
TRIM68	214.9942587	-0.43877622	0.115832981	-3.788007655	0.00015186	3.82E+00	0.002257288
FAM66D	8.127466965	0.749816829	0.197961021	3.787699344	0.000152049	3.82E+00	0.002258387
CEACAM5	1577.066622	-1.313094072	0.346758921	-3.786763631	0.000152622	3.82E+00	0.002265198
IL1RAP	230.0992265	-0.420750859	0.111134723	-3.785953197	0.00015312	3.81E+00	0.002270884
SOX17	57.70816782	0.438566019	0.115873791	3.784859505	0.000153795	3.81E+00	0.002279179
PLCXD3	25.89482714	0.90758721	0.239808995	3.784625392	0.00015394	3.81E+00	0.002279611
ACAP1	128.3419904	0.708357326	0.187240592	3.783139752	0.000154862	3.81E+00	0.002291545
CYP2F1	1.651077538	2.650734176	0.700752471	3.782696864	0.000155138	3.81E+00	0.002293905
CTNNA3	2.036921352	0.882164886	0.233261039	3.781878408	0.000155649	3.81E+00	0.002299737
EDA	64.17195462	0.463234115	0.122507451	3.781272995	0.000156028	3.81E+00	0.002303611
UBL4B	2.310745562	0.723104309	0.191297285	3.780002987	0.000156826	3.8E+00	0.00231366
SLC29A1	2498.504676	0.34010338	0.089994481	3.779158176	0.000157359	3.8E+00	0.002319787
NEDD4	552.4631236	-0.324400724	0.085917918	-3.77570514	0.000159556	3.8E+00	0.002350405
GDE1	2638.223707	-0.248439373	0.065836705	-3.773569353	0.000160928	3.79E+00	0.002366241
RAB3GAP1	1735.426941	-0.197243541	0.052268627	-3.773650678	0.000160876	3.79E+00	0.002366241
TMEM35	16.39520703	0.685364454	0.181635927	3.773286856	0.000161111	3.79E+00	0.002366241
KRT77	1.662273019	2.059539889	0.545811425	3.773354305	0.000161067	3.79E+00	0.002366241
GRIA4	19.66286803	1.155692326	0.306333188	3.772664445	0.000161513	3.79E+00	0.002370387
KANK3	64.74934594	0.378558768	0.100428596	3.769432052	0.000163619	3.79E+00	0.002394164
PLA2G4A	113.0194522	0.664523542	0.176276649	3.769776337	0.000163394	3.79E+00	0.002394164
TOX	77.64203851	0.692048092	0.183593151	3.769465727	0.000163597	3.79E+00	0.002394164
LOC100190938	103.3159301	0.695514005	0.184498552	3.769753188	0.000163409	3.79E+00	0.002394164
PLEKHA8	141.5266091	-0.332099935	0.088115934	-3.768897646	0.00016397	3.79E+00	0.002397515
ACSM1	41.5222524	-0.786913635	0.208802321	-3.768701572	0.000164099	3.78E+00	0.002397621
XCL1	12.11825068	0.738124907	0.19591374	3.76760154	0.000164824	3.78E+00	0.002406423
RNF165	56.161272	0.626723836	0.166387223	3.766658425	0.000165447	3.78E+00	0.002412545
CABP7	8.290711524	0.763814861	0.20278644	3.766597324	0.000165488	3.78E+00	0.002412545
JPH4	12.76982394	0.490002404	0.130106594	3.766161185	0.000165777	3.78E+00	0.002414975
KREMEN2	71.43575348	-0.893833571	0.237434368	-3.764550094	0.000166849	3.78E+00	0.002428802
DFNA5	176.9588159	-0.378476056	0.100552146	-3.763977921	0.000167232	3.78E+00	0.002432573
FLJ90757	623.5482522	0.316639097	0.084135357	3.763448653	0.000167586	3.78E+00	0.002435931
MYC	2059.602787	0.521569337	0.13862846	3.762353974	0.000168322	3.77E+00	0.002444818
FCF1	823.9655614	-0.188580114	0.05013757	-3.761253568	0.000169064	3.77E+00	0.002453792
NAT2	15.08169329	-0.968256908	0.257595047	-3.75883356	0.000170707	3.77E+00	0.002474044
CDKN1A	2008.218359	-0.427869977	0.11383065	-3.758829254	0.00017071	3.77E+00	0.002474044
DUSP10	521.4703163	-0.444691548	0.118329696	-3.75807227	0.000171227	3.77E+00	0.002479715
LOC100190939	115.5049524	0.370638001	0.098644924	3.757294191	0.000171761	3.77E+00	0.002483786
SVOP	2.625421954	2.632455017	0.700601055	3.757423713	0.000171672	3.77E+00	0.002483786
SLC9A3R1	7372.550873	0.492672744	0.131198924	3.755158426	0.000173232	3.76E+00	0.002503226
SLC6A8	1082.999406	-0.422597831	0.112548106	-3.754819573	0.000173466	3.76E+00	0.002504778
PTPLB	347.510928	-0.401110144	0.106882806	-3.752803279	0.000174868	3.76E+00	0.00252317
SAA1	624.601218	0.948265757	0.252723769	3.752182708	0.000175302	3.76E+00	0.002527575
TAF12	477.3872756	-0.202840255	0.054063474	-3.75189084	0.000175506	3.76E+00	0.00252867
TMEM145	67.55678077	0.993497838	0.264820265	3.751592938	0.000175715	3.76E+00	0.002529828
ANKRD34B	5.1558299	-1.271599722	0.33916805	-3.749173082	0.000177419	3.75E+00	0.002552497
PCP4	11.13748203	1.162812347	0.310218204	3.74836915	0.000177988	3.75E+00	0.002558823
KLRK1	84.90024439	0.698424443	0.186340751	3.748103623	0.000178177	3.75E+00	0.002559666
MYOCD	10.71310575	0.713030003	0.190309889	3.746678682	0.000179191	3.75E+00	0.002572369
NRSN1	0.969659394	1.620136067	0.432513671	3.745860945	0.000179776	3.75E+00	0.002578831
MAGEA4	9.006797891	2.935253435	0.783636255	3.74568356	0.000179903	3.74E+00	0.002578831
SLC9A5	21.76692715	-0.480735508	0.128427374	-3.743247991	0.000181657	3.74E+00	0.002596217
WWC3	1571.268897	-0.273726697	0.073127379	-3.743149286	0.000181728	3.74E+00	0.002596217
CD6	185.7018285	0.627950144	0.167750981	3.743347071	0.000181585	3.74E+00	0.002596217
C4BPA	11.59025488	1.380770067	0.368857076	3.743374215	0.000181566	3.74E+00	0.002596217
ZBTB8B	3.215625992	1.412218845	0.377287411	3.743084988	0.000181775	3.74E+00	0.002596217
PALM	527.0670961	0.485445291	0.129702112	3.742770913	0.000182002	3.74E+00	0.002597583
FLJ42393	1.432077712	1.149450802	0.307292197	3.740579204	0.000183597	3.74E+00	0.002618445
DIRC1	3.066154975	-0.704405876	0.188351711	-3.739843259	0.000184135	3.73E+00	0.002621541
C15orf27	16.4842223	0.478021426	0.127810751	3.740072117	0.000183967	3.74E+00	0.002621541
P2RY8	146.3252906	0.517024602	0.13825159	3.739737112	0.000184213	3.73E+00	0.002621541
CFTR	7.477337248	1.113546409	0.297776505	3.739537505	0.000184359	3.73E+00	0.002621731
PRR12	1115.308282	0.265678983	0.071055861	3.739015761	0.000184742	3.73E+00	0.002625283
KRT81	420.2536208	1.151166775	0.307955357	3.738096282	0.000185419	3.73E+00	0.002633002
C1orf116	823.756227	-0.758450047	0.202916291	-3.737748432	0.000185676	3.73E+00	0.002634749
KIF12	573.3359782	0.771714282	0.206525561	3.736652629	0.000186486	3.73E+00	0.002644348
FN1	119957.5337	-0.508597769	0.136132514	-3.736049195	0.000186934	3.73E+00	0.002648793
C2CD2L	464.2033605	-0.258992526	0.069355687	-3.734265171	0.000188264	3.73E+00	0.002665722
SLC22A11	1.665131631	0.971581634	0.260246658	3.7333107	0.000188979	3.72E+00	0.002673927
KCNJ3	708.3252688	1.521830693	0.407812064	3.731696107	0.000190195	3.72E+00	0.002689197
LOC220930	87.28126441	0.326593609	0.087552883	3.730243908	0.000191294	3.72E+00	0.002702806
TMEM106C	1869.829318	0.30640438	0.082146674	3.729966939	0.000191505	3.72E+00	0.002703841
ACADS	281.2749397	0.442657072	0.118705101	3.729048428	0.000192204	3.72E+00	0.00271014
CNTNAP4	1.790402726	1.513104628	0.405764707	3.729019806	0.000192226	3.72E+00	0.00271014
RARRES2	703.5719635	-0.493597239	0.132528963	-3.724448048	0.000195743	3.71E+00	0.002757752
EML3	651.9033533	0.238382457	0.064011961	3.724029886	0.000196068	3.71E+00	0.002760353
TBC1D24	454.4647349	-0.376963757	0.101243321	-3.723344439	0.000196601	3.71E+00	0.002765886
TMEM132B	8.119936794	-0.567928927	0.152590222	-3.721922154	0.000197712	3.7E+00	0.00277755
C6orf64	970.0345103	0.256547389	0.068927678	3.721979255	0.000197667	3.7E+00	0.00277755
ZNF826	29.39564622	-0.570383343	0.153270323	-3.721420644	0.000198105	3.7E+00	0.002781091
CHMP2B	1291.422992	-0.213838846	0.05746698	-3.721073348	0.000198378	3.7E+00	0.002782937
PRKRIR	1525.239132	0.355804596	0.095632718	3.720532101	0.000198803	3.7E+00	0.002786925
LOC100188949	9.13103086	0.710076249	0.190876918	3.72007394	0.000199164	3.7E+00	0.002790001
SCML4	32.43769006	0.751752124	0.20214062	3.718956254	0.000200048	3.7E+00	0.002800384
SERPINC1	3.58065241	-0.685112611	0.184283052	-3.717719033	0.00020103	3.7E+00	0.002811489
TPCN2	299.6294879	0.324838224	0.087378532	3.717597626	0.000201126	3.7E+00	0.002811489
BRSK1	107.238562	0.585561096	0.157567815	3.716248124	0.000202203	3.69E+00	0.002824537
BNIP3L	2922.31916	-0.285573483	0.076851396	-3.715917959	0.000202467	3.69E+00	0.002826225
ARHGEF15	253.1824687	0.364917673	0.098234833	3.714748226	0.000203406	3.69E+00	0.002837321
PTPRB	684.5980339	0.411939285	0.110911743	3.714117866	0.000203914	3.69E+00	0.00284239
FAM123A	1.363434226	2.757583075	0.742513507	3.713849041	0.000204131	3.69E+00	0.002843402
CSF2RB	352.6791455	0.558745931	0.15048217	3.713037438	0.000204787	3.69E+00	0.002850525
EEF1DP3	2.756650432	-0.63223145	0.1702864	-3.712753625	0.000205016	3.69E+00	0.002850535
TKTL1	1.229852202	1.367783001	0.368408587	3.712679481	0.000205077	3.69E+00	0.002850535
SPNS3	8.147138522	0.63574915	0.171247156	3.712465449	0.00020525	3.69E+00	0.002850937
FABP3	162.9940095	-0.584554565	0.157515264	-3.711097899	0.000206362	3.69E+00	0.002864366
ITGA7	206.5351503	0.54187061	0.146021971	3.710884108	0.000206537	3.69E+00	0.002864769
ETV1	294.7514531	-0.428735239	0.115588489	-3.709151676	0.000207955	3.68E+00	0.002882412
TAT	604.9355295	1.450231954	0.391024821	3.708797691	0.000208246	3.68E+00	0.002884416
KLRB1	46.34054435	0.71070919	0.191660842	3.708160645	0.00020877	3.68E+00	0.002889649
C17orf82	7.008625459	0.749116842	0.202120647	3.706285592	0.000210321	3.68E+00	0.002909073
SCUBE3	220.4626188	0.875110719	0.236222686	3.704600656	0.000211724	3.67E+00	0.002926424
ANXA2P3	4.432018453	-0.44059751	0.118951677	-3.704004198	0.000212223	3.67E+00	0.002931262
SLC16A11	11.95185201	0.810678737	0.218945173	3.70265636	0.000213354	3.67E+00	0.00294482
SLC19A1	398.8032567	0.35908463	0.09701997	3.701141418	0.000214632	3.67E+00	0.002956249
DUSP1	2972.311376	0.505779067	0.1366515	3.701233178	0.000214554	3.67E+00	0.002956249
PRKCB	198.0902813	0.676687107	0.182822913	3.701325483	0.000214476	3.67E+00	0.002956249
LRP6	1289.058251	0.369461851	0.099840832	3.700508526	0.000215168	3.67E+00	0.002961563
GAP43	7.707550227	-0.608911332	0.164558118	-3.700281327	0.000215361	3.67E+00	0.002962147
NUDT10	48.12361705	-0.707054744	0.191116944	-3.699592147	0.000215946	3.67E+00	0.002966448
PFKM	861.2757201	0.330243039	0.089265511	3.69955916	0.000215974	3.67E+00	0.002966448
PARN	1720.916301	-0.19761595	0.053435463	-3.698217228	0.000217119	3.66E+00	0.002980095
C10orf108	3.520746236	0.800249885	0.216423499	3.697610884	0.000217638	3.66E+00	0.002985141
DEPDC7	39.04745441	-0.543347904	0.146963396	-3.697164873	0.000218021	3.66E+00	0.002988309
FAM171A2	61.02423989	0.609136485	0.164837943	3.69536572	0.000219571	3.66E+00	0.00300746
CCNJL	99.43880944	-0.594075865	0.160824284	-3.693943787	0.000220803	3.66E+00	0.003022236
HGD	213.1575031	-1.007696929	0.272943773	-3.691957935	0.000222534	3.65E+00	0.003041713
CARHSP1	1308.165475	-0.275775883	0.074694503	-3.692050605	0.000222453	3.65E+00	0.003041713
PPAPDC1A	153.7564883	-0.645404109	0.174865369	-3.690862927	0.000223495	3.65E+00	0.003052722
FRS3	91.05198824	0.292403354	0.07925973	3.689179273	0.000224979	3.65E+00	0.003070865
MMP23B	46.08986029	0.567470387	0.153949348	3.686085041	0.00022773	3.64E+00	0.003106273
MPV17	854.3306904	-0.227774007	0.061813297	-3.684870663	0.000228819	3.64E+00	0.003118745
KHK	123.3653697	0.428305842	0.116238613	3.684712265	0.000228961	3.64E+00	0.003118745
ATP9A	3377.673012	0.376233962	0.102123565	3.68410527	0.000229507	3.64E+00	0.003124027
MFSD4	86.52755793	0.628839429	0.170710463	3.683660742	0.000229908	3.64E+00	0.003127323
ZNF432	149.4485658	-0.28002176	0.076036104	-3.682747334	0.000230734	3.64E+00	0.003132069
HUS1	321.0539233	-0.188335676	0.051137234	-3.682946096	0.000230554	3.64E+00	0.003132069
TMUB2	746.9908772	0.209182751	0.05679997	3.682796832	0.000230689	3.64E+00	0.003132069
IKBIP	372.9294576	-0.236671164	0.064290442	-3.681280705	0.000232065	3.63E+00	0.003147975
NCRNA00169	2.351693531	-0.467674659	0.127116687	-3.679097301	0.000234061	3.63E+00	0.003172862
C12orf74	1.892767992	-1.307970318	0.355552785	-3.678695187	0.00023443	3.63E+00	0.003175684
STAB2	6.407765786	1.034853717	0.281338479	3.678322708	0.000234773	3.63E+00	0.00317814
CYS1	119.098856	-0.520564738	0.141565611	-3.677197682	0.00023581	3.63E+00	0.003187806
IL2	0.648153188	1.27185434	0.345870537	3.677255519	0.000235757	3.63E+00	0.003187806
BCL2L15	11.25972094	-0.604409053	0.164419544	-3.676017082	0.000236904	3.63E+00	0.003199702
BAIAP2L2	18.8407613	0.8355675	0.227309813	3.675897175	0.000237015	3.63E+00	0.003199702
SLC11A1	126.9312753	-0.513722254	0.139785016	-3.675088152	0.000237767	3.62E+00	0.003207662
CLCNKA	8.471114009	0.719032366	0.195727911	3.673632252	0.000239127	3.62E+00	0.003223796
FCER2	9.050772324	1.269120857	0.345508525	3.673196937	0.000239535	3.62E+00	0.003227088
LOC645431	45.43438218	0.667548642	0.181755129	3.67279122	0.000239915	3.62E+00	0.00323001
SH3RF2	112.3221753	-0.658154835	0.179304023	-3.670608293	0.000241974	3.62E+00	0.003255499
RNF222	3.29621183	1.265429079	0.344787201	3.670174171	0.000242385	3.62E+00	0.003258809
DNASE2B	13.74481163	-1.051670078	0.286579932	-3.669726876	0.00024281	3.61E+00	0.003262291
SMC6	949.3226979	-0.230108167	0.062740214	-3.66763438	0.000244805	3.61E+00	0.003284618
LOC100132215	11.04407256	0.574572704	0.156657945	3.667689527	0.000244752	3.61E+00	0.003284618
PHYHIPL	11.37874218	0.717845724	0.195753324	3.667093413	0.000245323	3.61E+00	0.003289333
SEC24A	1163.34636	-0.258820177	0.070585207	-3.666776495	0.000245627	3.61E+00	0.003289516
ELFN2	25.06103896	1.0248093	0.279488508	3.666731444	0.000245671	3.61E+00	0.003289516
FRMD3	58.58970626	0.694262155	0.189481788	3.664004666	0.000248302	3.61E+00	0.003322497
CCL17	13.6590032	0.816128025	0.22277393	3.663480841	0.000248811	3.6E+00	0.003327043
FAR1	1708.497638	0.311408408	0.085014177	3.663017387	0.000249262	3.6E+00	0.003330811
MCTS1	925.5284638	-0.175425173	0.047893206	-3.662840468	0.000249434	3.6E+00	0.003330855
RMRP	18.91641081	0.569884293	0.15559828	3.662535939	0.000249731	3.6E+00	0.003331579
MUC7	12.95919062	1.951154939	0.532747556	3.662438087	0.000249826	3.6E+00	0.003331579
ATP10A	352.5344952	-0.414147642	0.113154579	-3.660016642	0.000252199	3.6E+00	0.003356408
SEMA4C	1110.463383	0.321943745	0.087956989	3.660240635	0.000251978	3.6E+00	0.003356408
CORO1A	904.4732285	0.510059127	0.139355827	3.660120564	0.000252097	3.6E+00	0.003356408
PDE4A	539.8445962	-0.46958797	0.12832525	-3.65935753	0.000252848	3.6E+00	0.003362781
RNF5P1	127.6500906	0.292655333	0.080018548	3.657343722	0.000254843	3.59E+00	0.003387017
RHCG	29.94468981	1.397983506	0.382263298	3.657121974	0.000255063	3.59E+00	0.003387663
CCL16	0.824157122	1.119399684	0.306210746	3.655651213	0.00025653	3.59E+00	0.003404852
SLC35E3	336.5657106	0.295427666	0.08082115	3.655326168	0.000256855	3.59E+00	0.003406875
TM6SF2	10.39295245	-0.531481339	0.145518603	-3.652325746	0.000259876	3.59E+00	0.003442308
UBASH3A	36.21092765	0.756042465	0.20700024	3.652374817	0.000259826	3.59E+00	0.003442308
SEMA3G	432.3966933	0.502315968	0.137540436	3.652133022	0.000260071	3.58E+00	0.00344258
CD3D	119.4481252	0.707095375	0.193686277	3.65072521	0.000261501	3.58E+00	0.003459183
RASIP1	188.0221846	0.421110317	0.115363515	3.650290279	0.000261944	3.58E+00	0.003462722
NPR1	165.879678	0.486373781	0.133276534	3.649357969	0.000262897	3.58E+00	0.003470657
HEY2	202.6263889	0.664088738	0.181970896	3.649422801	0.00026283	3.58E+00	0.003470657
ZP2	1.08872839	-2.552231905	0.699636304	-3.647940924	0.00026435	3.58E+00	0.003487514
SUPT4H1	1699.922748	0.299537769	0.08212554	3.647315669	0.000264994	3.58E+00	0.003491335
SFRP5	2.519590914	1.390542789	0.381244603	3.647376983	0.000264931	3.58E+00	0.003491335
PDZRN4	50.0947132	-0.972300217	0.266659366	-3.646225644	0.00026612	3.57E+00	0.003499154
RNF150	81.28921189	0.661263922	0.181354486	3.646250699	0.000266094	3.57E+00	0.003499154
TRPM3	0.901918809	1.291044144	0.354059149	3.646408089	0.000265932	3.58E+00	0.003499154
C10orf10	1332.760431	0.458544751	0.125795887	3.645148985	0.000267237	3.57E+00	0.003511493
SEMA6C	164.9905296	0.376978388	0.103425122	3.644940245	0.000267454	3.57E+00	0.003512003
TESC	28.45929063	0.603448985	0.16556733	3.644734645	0.000267668	3.57E+00	0.003512472
UBE2A	1627.220068	-0.17724239	0.048637201	-3.644173344	0.000268253	3.57E+00	0.003517803
PTGES	1171.068806	0.641935031	0.176183191	3.643565698	0.000268887	3.57E+00	0.003521621
PRPH	6.300595332	0.832376972	0.228452047	3.643552264	0.000268901	3.57E+00	0.003521621
HSF1	1768.635265	0.320218766	0.087896058	3.643152756	0.000269319	3.57E+00	0.003524751
C7orf29	193.0331545	0.362410654	0.099506029	3.642097447	0.000270426	3.57E+00	0.003536888
LOC202781	237.7043285	0.384417072	0.105555014	3.64186463	0.00027067	3.57E+00	0.003537741
WNT7B	492.4031112	-0.60755736	0.166878214	-3.640723056	0.000271873	3.57E+00	0.003551111
GTF2E1	441.1249201	-0.20916557	0.057465155	-3.639867858	0.000272778	3.56E+00	0.003560566
POU2F3	128.1347359	-0.458350827	0.125932074	-3.639667108	0.000272991	3.56E+00	0.003560984
CCDC69	421.1063104	0.468809767	0.128816022	3.639374657	0.000273301	3.56E+00	0.003562673
TFG	2706.306427	-0.217042752	0.059643045	-3.639028681	0.000273668	3.56E+00	0.003565104
SLC45A3	184.1060846	-0.493818231	0.135728515	-3.638279186	0.000274466	3.56E+00	0.003572849
TRAK1	1663.863549	0.259421029	0.071306156	3.638129462	0.000274625	3.56E+00	0.003572849
ACSBG1	4.943379231	-0.471537574	0.129625388	-3.6376946	0.000275089	3.56E+00	0.003576524
PGBD5	148.9901557	0.769078567	0.211556234	3.635338713	0.000277616	3.56E+00	0.00360699
HDGFRP3	1034.568492	0.349659276	0.096216515	3.634087914	0.000278966	3.55E+00	0.003622144
RXFP1	2.05030191	-0.901152971	0.248048842	-3.632965847	0.000280182	3.55E+00	0.003635543
GIMAP8	281.6266442	0.382594552	0.105356268	3.631436054	0.000281848	3.55E+00	0.003654732
TRIM45	308.3981331	0.421600477	0.116103568	3.631244802	0.000282057	3.55E+00	0.003654732
WBP2NL	10.01371759	0.559544052	0.154097727	3.631098685	0.000282217	3.55E+00	0.003654732
MGC16121	13.20538387	0.578216864	0.159324503	3.629177269	0.000284326	3.55E+00	0.003679622
GP1BA	17.03074542	0.669125371	0.184390737	3.628844817	0.000284692	3.55E+00	0.003681946
CD27	157.8523701	0.689288262	0.18996131	3.628571849	0.000284993	3.55E+00	0.003683423
MAF1	2157.938566	0.278365445	0.07671848	3.628401437	0.000285182	3.54E+00	0.00368344
C20orf135	75.18515572	0.429703103	0.118454522	3.627578726	0.000286092	3.54E+00	0.003692773
GRAMD2	186.8751447	-0.70654126	0.194791579	-3.627165329	0.00028655	3.54E+00	0.003694502
ANKRD55	4.962732261	0.732463784	0.201940887	3.627119763	0.0002866	3.54E+00	0.003694502
C1QL2	5.875574178	1.564413799	0.431355653	3.626737675	0.000287025	3.54E+00	0.003697553
MAT2A	4542.046418	-0.171709433	0.047354776	-3.62602143	0.000287821	3.54E+00	0.003705396
ATN1	4197.154123	0.210746449	0.058131207	3.625358195	0.000288561	3.54E+00	0.003712494
DNAH14	186.5884071	-0.352364177	0.097205649	-3.62493519	0.000289034	3.54E+00	0.00371615
TTC24	2.042297711	1.139864927	0.314480521	3.624596282	0.000289413	3.54E+00	0.003718601
TRIM46	87.24820595	-0.543450153	0.14995601	-3.624063836	0.00029001	3.54E+00	0.003723841
NDUFB3	712.1976878	-0.196327279	0.054192735	-3.622760119	0.000291476	3.54E+00	0.003740231
DNAJC15	711.0477852	-0.349005376	0.09635102	-3.622228162	0.000292076	3.53E+00	0.003741773
SQRDL	1866.380564	-0.284154724	0.078449211	-3.62214891	0.000292166	3.53E+00	0.003741773
KCNH6	3.932746201	1.740000277	0.480343584	3.622407661	0.000291874	3.53E+00	0.003741773
FLOT2	2580.477388	0.267710116	0.073940435	3.620618601	0.000293899	3.53E+00	0.003761532
TAF1B	272.5577116	-0.20916212	0.057776663	-3.620183482	0.000294394	3.53E+00	0.003765418
PAQR4	1218.595956	-0.444256248	0.122766549	-3.618707631	0.000296078	3.53E+00	0.003784498
MAGEA8	1.898632451	1.044311198	0.288607554	3.618447207	0.000296376	3.53E+00	0.003785852
WBP11	2828.683621	0.280064917	0.07743105	3.616958789	0.000298085	3.53E+00	0.003805214
CBX7	596.0603872	0.372864652	0.103096612	3.616652818	0.000298437	3.53E+00	0.003807247
CNNM3	997.8767043	0.216491165	0.05986389	3.616389882	0.00029874	3.52E+00	0.003808649
SV2A	94.72103309	0.583977327	0.161505688	3.615831326	0.000299385	3.52E+00	0.003814405
SLC45A1	50.76054715	0.502288919	0.138957759	3.614687829	0.00030071	3.52E+00	0.003828804
CRB2	10.2765837	0.628389824	0.173874152	3.61404969	0.000301451	3.52E+00	0.003835768
BLK	18.34574267	1.058782216	0.293006258	3.613513997	0.000302075	3.52E+00	0.003841225
AATK	74.98799582	0.606910278	0.168016502	3.612206356	0.000303603	3.52E+00	0.003858163
CCDC15	98.96233093	-0.377043639	0.104467729	-3.609187684	0.000307157	3.51E+00	0.003895799
C14orf149	72.32096613	-0.245481053	0.068013604	-3.609293414	0.000307032	3.51E+00	0.003895799
UNC13C	1.492365269	0.889132536	0.24633896	3.609386575	0.000306922	3.51E+00	0.003895799
CHORDC1	627.2182981	-0.319171112	0.088454898	-3.608292134	0.000308219	3.51E+00	0.003904243
FN3K	421.3641224	0.387989378	0.107523485	3.608415202	0.000308073	3.51E+00	0.003904243
HERC3	640.3861247	-0.328028286	0.090918324	-3.607944717	0.000308632	3.51E+00	0.003906963
ART5	7.096552051	0.658457092	0.18251406	3.607706124	0.000308916	3.51E+00	0.003908046
CSAG2	3.710207387	2.844787342	0.788612197	3.607333683	0.00030936	3.51E+00	0.003911148
LYPD4	0.572584957	-1.397227981	0.387348116	-3.60716349	0.000309563	3.51E+00	0.003911205
HEPACAM	6.812774895	1.178293625	0.326675561	3.606923088	0.000309849	3.51E+00	0.003912321
LOC100132111	9.133282712	-0.533073043	0.147909225	-3.604055408	0.00031329	3.5E+00	0.003943136
HMGB3	1670.075408	-0.457166594	0.126833848	-3.604452599	0.000312812	3.5E+00	0.003943136
RALB	1496.297002	-0.201743829	0.055976232	-3.604098042	0.000313239	3.5E+00	0.003943136
EGFL8	62.8595772	0.42085617	0.116769123	3.604173424	0.000313148	3.5E+00	0.003943136
OR7A5	2.571661228	1.262273533	0.350236937	3.604055996	0.00031329	3.5E+00	0.003943136
KPNA1	2071.359393	-0.162394844	0.045075157	-3.602757126	0.00031486	3.5E+00	0.00396036
PLAUR	767.8223858	-0.418025633	0.11608506	-3.601028688	0.000316961	3.5E+00	0.003984243
FUT5	1.621065458	1.367780151	0.380079248	3.598670955	0.000319848	3.5E+00	0.00401797
ASPH	6518.481799	-0.44149012	0.122696502	-3.598229077	0.000320391	3.49E+00	0.004019678
STAT4	74.29062636	0.596681765	0.165823098	3.598303085	0.0003203	3.49E+00	0.004019678
C13orf29	128.5921335	-0.559663033	0.155614022	-3.596482035	0.00032255	3.49E+00	0.004044184
ZNF350	352.8208209	-0.3313423	0.092160077	-3.595291048	0.000324029	3.49E+00	0.004058331
ZDHHC8	407.4099009	0.295336683	0.082146533	3.595242191	0.00032409	3.49E+00	0.004058331
C10orf75	131.1549962	-0.459554313	0.127980214	-3.590823136	0.000329635	3.48E+00	0.00412515
PRIMA1	76.66192686	0.647199134	0.180260931	3.590346117	0.000330239	3.48E+00	0.004130085
DENND1C	206.7879805	0.338417454	0.094266526	3.590006623	0.00033067	3.48E+00	0.004130226
MSI1	99.95374939	0.841035863	0.234268037	3.590058099	0.000330604	3.48E+00	0.004130226
MYO1D	2832.922278	-0.288219437	0.080325462	-3.588145418	0.000333039	3.48E+00	0.004157181
SLC26A6	244.8034407	-0.368182025	0.102618859	-3.587859254	0.000333404	3.48E+00	0.004159112
CYP2D6	8.777327581	0.696937084	0.194309071	3.586744976	0.000334831	3.48E+00	0.004169001
CD8B	77.11453279	0.70014548	0.195189973	3.586995108	0.000334511	3.48E+00	0.004169001
LCN6	0.88939084	1.31387699	0.366312474	3.586765629	0.000334805	3.48E+00	0.004169001
GPR1	49.78706731	-0.664874362	0.185446183	-3.585268524	0.000336732	3.47E+00	0.004184728
WDR55	572.1469073	-0.184884268	0.051567399	-3.585293636	0.000336699	3.47E+00	0.004184728
PNMA3	18.19925275	0.978415282	0.272876038	3.585566869	0.000336347	3.47E+00	0.004184728
GIPC2	29.00493166	0.58782141	0.164175454	3.580446383	0.000343008	3.46E+00	0.004260039
SMPD3	216.8666643	0.639754738	0.178727219	3.579503688	0.000344247	3.46E+00	0.004272743
SRBD1	510.5185049	-0.174969758	0.048897865	-3.578269861	0.000345876	3.46E+00	0.004290258
METTL6	319.5952342	-0.170204912	0.047597585	-3.575914839	0.000349005	3.46E+00	0.004326348
ANKRD20A3	7.254078991	0.66647728	0.186415068	3.575232869	0.000349916	3.46E+00	0.004334915
LRFN4	418.6979987	0.468192663	0.130974388	3.574688686	0.000350645	3.46E+00	0.004341212
RBM24	233.7218436	0.951768726	0.266272193	3.574420271	0.000351005	3.45E+00	0.00434294
TMEM159	967.8409969	-0.282031389	0.07891475	-3.573874191	0.000351738	3.45E+00	0.004349282
TMEM64	832.5710202	0.622806416	0.17428077	3.573580822	0.000352132	3.45E+00	0.00435143
ETF1	3179.760711	-0.16751801	0.046882337	-3.573158289	0.000352701	3.45E+00	0.004353002
KLHDC3	1999.945449	0.298206877	0.083454513	3.573286393	0.000352529	3.45E+00	0.004353002
MYCL1	229.8889088	0.577562569	0.161749282	3.570727257	0.000355991	3.45E+00	0.004390858
INHBA	465.1571512	-0.48485531	0.13579877	-3.570395437	0.000356443	3.45E+00	0.004393675
ADAMTS18	45.06774827	0.857192811	0.240108171	3.570027662	0.000356944	3.45E+00	0.004397098
RSPH3	175.2484103	-0.277548059	0.077751083	-3.569700235	0.00035739	3.45E+00	0.004399848
CAP1	7959.273337	-0.184379624	0.051668331	-3.568522934	0.000358999	3.44E+00	0.004416903
NRF1	390.5775553	0.102147862	0.028643701	3.566154465	0.000362258	3.44E+00	0.004454213
SLC4A11	162.7703988	-0.718855621	0.201589267	-3.565941932	0.000362552	3.44E+00	0.004455045
QSOX2	367.586605	0.285332973	0.08004474	3.564668619	0.000364316	3.44E+00	0.004473939
ALDH16A1	562.061005	0.320142483	0.089822025	3.564186889	0.000364986	3.44E+00	0.004479372
USP26	0.694858276	-1.118147245	0.313786177	-3.563405042	0.000366075	3.44E+00	0.004487153
KLHL34	3.376029251	1.689780221	0.474190038	3.563508481	0.000365931	3.44E+00	0.004487153
CXorf41	0.886949963	-1.570646756	0.44087393	-3.562575717	0.000367234	3.44E+00	0.004498559
ZBBX	4.07817391	-1.421735662	0.399097627	-3.562375634	0.000367514	3.43E+00	0.004499193
MYCT1	198.8491833	0.365598313	0.102635506	3.562103683	0.000367895	3.43E+00	0.004501062
CD7	87.67153681	0.667843665	0.187627717	3.559408368	0.000371691	3.43E+00	0.004544686
TMIGD2	3.816496655	0.880749856	0.247469589	3.559022581	0.000372238	3.43E+00	0.004548544
SLC9A7	168.5690365	-0.429867909	0.120812218	-3.558149292	0.000373477	3.43E+00	0.004558909
CCL5	935.4181057	0.643247686	0.180784083	3.558099114	0.000373548	3.43E+00	0.004558909
LTK	5.481764831	0.78059593	0.219498163	3.556275451	0.00037615	3.42E+00	0.004587816
PGPEP1L	1.069247415	1.993950417	0.560777219	3.555690831	0.000376987	3.42E+00	0.004595187
FAM43B	16.47070673	0.497943908	0.140065925	3.555068151	0.000377881	3.42E+00	0.004603237
KLF15	35.90372699	0.633186739	0.178138523	3.554462719	0.000378752	3.42E+00	0.004610998
ABTB1	341.153582	0.277550091	0.07809095	3.554190197	0.000379145	3.42E+00	0.00461293
COL8A1	881.3570141	-0.542003063	0.152574636	-3.552379844	0.000381763	3.42E+00	0.00463906
MLL4	1163.592604	0.22806904	0.064198921	3.552536949	0.000381535	3.42E+00	0.00463906
HEXB	2590.102821	-0.200109609	0.056354599	-3.550901091	0.000383915	3.42E+00	0.004662328
JAM2	161.8471152	0.397473764	0.111960703	3.550118517	0.000385058	3.41E+00	0.00467333
NAPSB	197.7081571	0.554459324	0.156188088	3.549946293	0.00038531	3.41E+00	0.004673511
SSFA2	4195.179068	-0.572445757	0.161275103	-3.549498622	0.000385965	3.41E+00	0.004678585
LAMC2	1596.391019	-0.712331892	0.200728434	-3.548734364	0.000387087	3.41E+00	0.0046893
CPPED1	707.6532559	-0.345890051	0.097497814	-3.547669814	0.000388655	3.41E+00	0.004696746
NRSN2	1093.380916	0.29701547	0.083717925	3.547812112	0.000388445	3.41E+00	0.004696746
SIRPG	50.54276573	0.744126682	0.209744969	3.547768914	0.000388509	3.41E+00	0.004696746
DMRTA2	1.639427985	1.760057603	0.496077636	3.547947891	0.000388245	3.41E+00	0.004696746
PAQR7	359.1833473	0.26690401	0.075315666	3.543804681	0.000394397	3.4E+00	0.004763218
SCN1A	3.279970994	1.80004978	0.508340942	3.541028534	0.00039857	3.4E+00	0.00481067
THBS4	1350.334367	0.740639201	0.20917918	3.540692733	0.000399078	3.4E+00	0.004813848
CRAT	2332.375524	-0.574349769	0.16224749	-3.539960889	0.000400186	3.4E+00	0.004824265
CCRL1	71.0803233	-0.504161923	0.142474715	-3.538606287	0.000402245	3.4E+00	0.004846122
TCTEX1D4	4.139498427	-0.510388852	0.14428202	-3.537439048	0.000404027	3.39E+00	0.004864619
TRPA1	136.6863399	-1.161543961	0.328379128	-3.537203982	0.000404387	3.39E+00	0.004864768
DLC1	897.2053913	0.360391969	0.101888866	3.537108461	0.000404534	3.39E+00	0.004864768
FANK1	165.5080135	-0.515204886	0.145721531	-3.535544019	0.000406936	3.39E+00	0.004890681
FMO6P	2.569026602	1.670128703	0.472470893	3.534881677	0.000407958	3.39E+00	0.004899968
ITK	130.6691663	0.689452217	0.195059972	3.534565336	0.000408446	3.39E+00	0.00490285
ZNF720	436.5947867	-0.234382232	0.066338189	-3.533141826	0.000410652	3.39E+00	0.004926326
CLPTM1	3115.169783	0.22001341	0.062283341	3.532459997	0.000411713	3.39E+00	0.004930045
ZNF559	247.7099915	0.286465781	0.081091727	3.532614123	0.000411473	3.39E+00	0.004930045
PARP11	330.3984754	0.316028997	0.089464264	3.532460693	0.000411711	3.39E+00	0.004930045
GABRB2	35.3840857	-0.664965913	0.18825713	-3.53222167	0.000412084	3.39E+00	0.004931494
PRKAA1	1265.650358	-0.312156847	0.088393503	-3.531445596	0.000413295	3.38E+00	0.004942987
RPS27L	1127.428409	-0.303372604	0.085949768	-3.52965005	0.00041611	3.38E+00	0.004970619
TLE3	2596.334208	0.27468405	0.077821502	3.52966783	0.000416082	3.38E+00	0.004970619
HOXB8	22.13893725	0.758317913	0.214871055	3.529176659	0.000416855	3.38E+00	0.004976504
AIM1	2121.64569	-0.457684955	0.129736616	-3.527800933	0.000419027	3.38E+00	0.004997062
MOG	2.130556228	2.409884966	0.683119453	3.527765098	0.000419084	3.38E+00	0.004997062
CA2	1867.180522	-0.859262416	0.243612927	-3.527162651	0.000420039	3.38E+00	0.005005418
EBI3	41.57212897	0.515769846	0.14627906	3.525930816	0.000421997	3.37E+00	0.005025719
CCDC28B	94.90306625	0.419509496	0.118996215	3.525402012	0.000422841	3.37E+00	0.005032722
FAM183A	11.35835918	-0.821046265	0.232941419	-3.524689883	0.000423979	3.37E+00	0.005043224
SLMO1	62.78617779	0.400734514	0.113721615	3.523820115	0.000425373	3.37E+00	0.005056755
SDHA	2261.967566	-0.21818031	0.061927405	-3.523162496	0.00042643	3.37E+00	0.005066264
TSHZ1	744.9029101	0.287669297	0.081660698	3.522738669	0.000427112	3.37E+00	0.005071315
PNMAL1	414.1278	0.649174575	0.184340894	3.521598288	0.000428954	3.37E+00	0.005090112
KIAA0195	1692.307337	0.294859233	0.08376112	3.520239843	0.000431157	3.37E+00	0.005113176
C16orf71	48.71052886	-0.549018536	0.155985547	-3.519675677	0.000432075	3.36E+00	0.005120983
SMAD3	1264.352278	0.3081848	0.087569531	3.519315392	0.000432662	3.36E+00	0.005124861
HEPH	597.7853187	-0.419434835	0.119223075	-3.518067569	0.000434702	3.36E+00	0.005145928
SOSTDC1	125.0186268	1.038148545	0.295139939	3.51747903	0.000435667	3.36E+00	0.005154257
PPP1R1C	9.077036081	-1.279586727	0.363901177	-3.516302801	0.000437602	3.36E+00	0.005167842
DACT1	384.51991	-0.432452203	0.122977912	-3.516503049	0.000437272	3.36E+00	0.005167842
C14orf145	135.3209786	-0.327374274	0.093099362	-3.516396529	0.000437447	3.36E+00	0.005167842
MADCAM1	2.428599973	0.999576802	0.284356274	3.515226826	0.000439379	3.36E+00	0.005185719
CLN8	312.2823542	-0.255217392	0.072634329	-3.513729611	0.000441862	3.35E+00	0.005211913
LOC653786	4.712657591	-0.548349785	0.156071518	-3.513451986	0.000442324	3.35E+00	0.005214242
TYSND1	592.3515535	0.271519174	0.077301454	3.512471764	0.000443959	3.35E+00	0.005230386
FILIP1L	945.8904893	-0.373368065	0.106330493	-3.511392208	0.000445766	3.35E+00	0.005245997
ATP2B2	21.1050981	0.963855527	0.274496188	3.511362161	0.000445817	3.35E+00	0.005245997
ZNF345	82.7267472	0.258208352	0.073556765	3.510327725	0.000447555	3.35E+00	0.005263308
TNFRSF10D	65.39873521	-0.546051867	0.155586922	-3.509625739	0.000448738	3.35E+00	0.005274074
CYP1A1	2.374110487	1.233083135	0.351365153	3.509406447	0.000449108	3.35E+00	0.00527528
TMEM61	35.37110323	0.662392966	0.188789318	3.508635838	0.000450411	3.35E+00	0.005287435
AMACR	477.9564948	-0.273354212	0.077925338	-3.507898944	0.000451661	3.35E+00	0.005298946
MGC16275	34.56434412	0.350544735	0.09996383	3.506715736	0.000453674	3.34E+00	0.005319396
INS-IGF2	2.609201885	0.934107976	0.266398786	3.5064273	0.000454165	3.34E+00	0.005321999
ZFP36	2632.486938	0.451355688	0.128759807	3.505408248	0.000455908	3.34E+00	0.005339239
PSMD5	1406.300256	-0.249612892	0.071225422	-3.504547727	0.000457384	3.34E+00	0.005350166
CCDC106	303.78585	0.385522956	0.110005652	3.504574069	0.000457338	3.34E+00	0.005350166
FAM65B	175.492959	0.597451149	0.170491312	3.504290867	0.000457825	3.34E+00	0.005352154
CCR6	90.43205042	0.571793819	0.163202672	3.503581237	0.000459047	3.34E+00	0.005363254
FTL	31960.07418	-0.32643807	0.093178176	-3.503374754	0.000459403	3.34E+00	0.005364233
HBA2	113.4963121	0.640029686	0.182766198	3.50190404	0.000461946	3.34E+00	0.005385343
CXCL2	35.4964357	0.802101276	0.229031498	3.502143949	0.00046153	3.34E+00	0.005385343
CCDC129	11.49817485	1.288573168	0.367968691	3.501855456	0.00046203	3.34E+00	0.005385343
SLC1A1	1196.066278	-0.900025244	0.257058226	-3.501250509	0.00046308	3.33E+00	0.005394393
C14orf180	10.53919072	1.215311189	0.347169696	3.500625779	0.000464167	3.33E+00	0.00540386
DDC	5.15999932	-1.43591232	0.41024094	-3.500168265	0.000464965	3.33E+00	0.005409948
MAPK8IP1	302.5841483	0.473439774	0.135294792	3.499320011	0.000466446	3.33E+00	0.005423987
C19orf39	88.35919365	-0.253745371	0.072539276	-3.498041144	0.000468689	3.33E+00	0.005446849
LAMB2L	18.83261988	0.417377522	0.119354319	3.496962043	0.000470589	3.33E+00	0.005465707
S100A10	3871.768035	-0.421153014	0.120460019	-3.496205788	0.000471925	3.33E+00	0.005471549
SPATA5	274.3820971	0.257891908	0.07376107	3.496314616	0.000471732	3.33E+00	0.005471549
LY6E	7297.050158	0.513841344	0.146964891	3.496354393	0.000471662	3.33E+00	0.005471549
RPH3A	3.073066444	-0.722900422	0.206849293	-3.494816981	0.000474387	3.32E+00	0.005490448
CNTD1	66.49410144	0.475492691	0.136056609	3.4948151	0.00047439	3.32E+00	0.005490448
JAK3	275.7400027	0.52339053	0.149754117	3.494999269	0.000474063	3.32E+00	0.005490448
GPR174	18.77571193	0.753467601	0.215646431	3.493995224	0.00047585	3.32E+00	0.005504105
IRF2BP1	588.2725746	0.28150745	0.080573724	3.493787278	0.00047622	3.32E+00	0.005505163
BMP1	739.1801513	-0.350646772	0.100452914	-3.490658062	0.000481833	3.32E+00	0.005566775
MYST4	2020.213201	0.432875452	0.12412928	3.487295294	0.000487932	3.31E+00	0.005633946
RERG	1622.792691	0.564848451	0.162037282	3.485916596	0.000490454	3.31E+00	0.005659746
RTEL1	377.9885824	0.300312993	0.086185152	3.48450963	0.00049304	3.31E+00	0.005683342
NAP1L5	113.194887	0.340401157	0.097690373	3.484490292	0.000493075	3.31E+00	0.005683342
ADARB2	4.022155427	1.025099883	0.294233703	3.483964866	0.000494044	3.31E+00	0.005691183
CCDC19	103.1597754	-0.569451968	0.163457467	-3.483792938	0.000494362	3.31E+00	0.005691513
C2orf7	286.1205793	-0.264125233	0.075823918	-3.483402584	0.000495083	3.31E+00	0.005694778
MITD1	210.5114893	-0.205760935	0.059070234	-3.483326906	0.000495223	3.31E+00	0.005694778
DENND1A	644.4514886	0.170622771	0.048994316	3.482501328	0.000496753	3.3E+00	0.005700085
FAIM3	378.1339055	0.517835863	0.148696359	3.482505319	0.000496745	3.3E+00	0.005700085
ASTN1	19.02906505	0.816639762	0.234482422	3.482733393	0.000496322	3.3E+00	0.005700085
XKR7	2.427552253	2.480871705	0.712391913	3.482453494	0.000496842	3.3E+00	0.005700085
LOC80054	49.17338352	0.461639695	0.132590846	3.48168603	0.000498268	3.3E+00	0.00571312
C6orf165	46.12849267	-0.520624682	0.14954193	-3.481462906	0.000498683	3.3E+00	0.005714558
ARHGEF10L	791.2320521	0.27377212	0.078658352	3.480521958	0.000500438	3.3E+00	0.005724811
CNTN2	20.01250613	0.870994715	0.250239394	3.480645882	0.000500206	3.3E+00	0.005724811
SYT5	15.54195926	1.19471738	0.343258697	3.480515985	0.000500449	3.3E+00	0.005724811
LOC283856	1.29393826	1.232830284	0.354228629	3.480323676	0.000500808	3.3E+00	0.005725599
PDPN	486.4518848	-0.444033071	0.127601713	-3.479836285	0.00050172	3.3E+00	0.005729643
PCDHA3	58.47789645	0.731077023	0.210090237	3.479823881	0.000501743	3.3E+00	0.005729643
IL12B	5.764417822	0.814199168	0.234060726	3.478580895	0.000504076	3.3E+00	0.005752949
KCTD5	945.8858128	-0.231920417	0.066677186	-3.478257438	0.000504685	3.3E+00	0.005756563
GOLM1	5697.987723	-0.417984972	0.120177109	-3.478074771	0.000505029	3.3E+00	0.005757156
MACC1	674.6520169	-0.500940518	0.144068046	-3.477110518	0.000506849	3.3E+00	0.005774561
FEM1C	1054.265729	-0.237717116	0.068372119	-3.476813662	0.00050741	3.29E+00	0.005777618
PCIF1	981.6662814	0.174360941	0.050162012	3.475955877	0.000509036	3.29E+00	0.005792783
MEOX2	83.85413603	0.573919842	0.165123868	3.475692821	0.000509536	3.29E+00	0.005795122
CXorf59	2.597162485	-1.142620091	0.328930533	-3.473742858	0.000513253	3.29E+00	0.005834031
CHMP4C	664.5917072	0.362692224	0.104419886	3.473401823	0.000513905	3.29E+00	0.005838083
DCAF7	3585.054188	0.240514049	0.069263604	3.47244492	0.000515741	3.29E+00	0.00585556
ARID5A	645.8771908	0.384000621	0.110680358	3.469455903	0.000521514	3.28E+00	0.005917694
WBP2	2779.701741	0.247927437	0.071470592	3.468943394	0.00052251	3.28E+00	0.005925583
TP53TG1	374.4569116	-0.385547493	0.111159269	-3.468424132	0.00052352	3.28E+00	0.005932109
B3GAT2	7.97102932	0.456276353	0.131554731	3.46833862	0.000523687	3.28E+00	0.005932109
GALNT10	2139.665132	-0.386169452	0.111362281	-3.467686257	0.00052496	3.28E+00	0.005943112
LOC374491	1.79547633	0.787244398	0.227082604	3.46677546	0.000526742	3.28E+00	0.005959862
RASA4	220.6365799	0.331535106	0.095641822	3.466423992	0.000527431	3.28E+00	0.005960815
GPRIN3	243.860557	0.56627125	0.163351735	3.46657629	0.000527132	3.28E+00	0.005960815
CASP4	692.0031923	-0.298404704	0.086090333	-3.466181318	0.000527907	3.28E+00	0.005962779
CCDC160	79.48766308	-0.63429832	0.183077645	-3.464641028	0.00053094	3.27E+00	0.005993597
PMM2	1174.871458	-0.213573167	0.06165272	-3.464132138	0.000531945	3.27E+00	0.00600151
MGC16025	0.904795094	1.24636176	0.359859917	3.463463701	0.000533269	3.27E+00	0.006012999
NT5C3L	613.0076519	0.264722024	0.076446028	3.462861702	0.000534463	3.27E+00	0.006023022
SLC6A20	20.59563362	0.637145098	0.184005576	3.462640169	0.000534903	3.27E+00	0.006024539
GGT7	321.796229	0.397053305	0.11467308	3.462480502	0.000535221	3.27E+00	0.006024672
TMEM151A	9.865380799	1.097312495	0.317083783	3.460638963	0.000538895	3.27E+00	0.006062569
CXCL17	418.185716	-1.091238077	0.315427422	-3.459553611	0.000541072	3.27E+00	0.006083583
C13orf16	2.121576357	-0.612634747	0.177141236	-3.458453611	0.000543286	3.26E+00	0.006101518
TLL1	103.4918255	-0.550780655	0.159253129	-3.458523279	0.000543145	3.27E+00	0.006101518
CSRNP1	773.3198169	0.307412414	0.088916275	3.457324488	0.000545567	3.26E+00	0.006123653
PXN	2497.023503	-0.242366635	0.070108584	-3.45701795	0.000546188	3.26E+00	0.006127134
CAND2	93.96124305	0.545859088	0.157954892	3.455790973	0.000548681	3.26E+00	0.00615159
SNX27	1684.842527	-0.203824442	0.058987364	-3.455391572	0.000549494	3.26E+00	0.006157209
TNFRSF10A	125.6417434	-0.352311141	0.101975802	-3.454850412	0.000550598	3.26E+00	0.006166074
TFCP2L1	842.7569474	0.768525125	0.222555747	3.453180323	0.000554019	3.26E+00	0.006200855
DCAKD	840.4847121	0.256015761	0.074147851	3.452773863	0.000554854	3.26E+00	0.00620668
NID2	1161.114937	-0.378087973	0.109532623	-3.451829812	0.000556799	3.25E+00	0.006224903
FOXRED1	366.1618002	-0.232967472	0.067562768	-3.448163551	0.000564412	3.25E+00	0.006306442
TLK2	858.9236281	0.247257544	0.071726469	3.447228717	0.000566369	3.25E+00	0.00632472
TIGD5	190.1457687	0.36332032	0.105405199	3.446891823	0.000567076	3.25E+00	0.006329026
ANPEP	2098.07681	0.753354032	0.218576037	3.446645126	0.000567594	3.25E+00	0.006331223
C12orf5	345.2705026	-0.265515305	0.077055846	-3.445751591	0.000569474	3.24E+00	0.0063486
ZNF674	77.96320551	-0.200254493	0.058121176	-3.445465243	0.000570077	3.24E+00	0.006351737
WNT16	1.969847302	0.850115781	0.246762414	3.445078068	0.000570894	3.24E+00	0.006357249
PCDHGA8	12.31190427	0.702982082	0.204087238	3.44451759	0.000572079	3.24E+00	0.006366847
CD109	1281.636868	-0.526927798	0.153019053	-3.443543717	0.000574144	3.24E+00	0.006384573
SULF1	7036.261384	-0.444739347	0.12916048	-3.443308249	0.000574644	3.24E+00	0.006384573
MAP1LC3C	6.490518658	0.703721885	0.20436731	3.44341708	0.000574413	3.24E+00	0.006384573
ETS1	2397.068542	0.339609488	0.098681663	3.441464971	0.000578573	3.24E+00	0.006424609
AFP	20.47077151	1.47914886	0.429908027	3.44061699	0.000580389	3.24E+00	0.006441147
IL11	17.78512724	-0.519538316	0.151029207	-3.439985726	0.000581745	3.24E+00	0.006452556
STARD3	1430.134132	-0.53249323	0.154813299	-3.439583253	0.000582611	3.23E+00	0.006458523
LRRC55	30.90169066	0.510033112	0.14830201	3.439151713	0.00058354	3.23E+00	0.006465191
CCDC42B	5.543404079	-0.761535405	0.221474436	-3.438479944	0.00058499	3.23E+00	0.006466714
CTHRC1	2162.165083	-0.407784263	0.118586032	-3.438720861	0.00058447	3.23E+00	0.006466714
RNF149	1202.450662	-0.159357089	0.046344561	-3.43852841	0.000584885	3.23E+00	0.006466714
TOB1	3954.724497	0.460316308	0.133870861	3.438510101	0.000584925	3.23E+00	0.006466714
DDX51	427.8664128	0.217629984	0.063319852	3.436994489	0.000588208	3.23E+00	0.006498639
NLRP12	14.9544943	-0.58399416	0.169947332	-3.436324379	0.000589665	3.23E+00	0.006511085
ZNF587	1642.604423	0.393632206	0.114607792	3.43460248	0.000593424	3.23E+00	0.006548925
PLCL1	322.723924	-0.567575514	0.165291463	-3.433786007	0.000595214	3.23E+00	0.006565006
KCNK10	2.952418949	0.860825153	0.250774764	3.432662597	0.000597685	3.22E+00	0.006588579
ZNF776	654.6946188	0.286873201	0.083610202	3.431078907	0.000601186	3.22E+00	0.00662346
ZNF282	686.1654347	0.201929752	0.058875092	3.429799355	0.000604028	3.22E+00	0.006651054
LYPD6B	322.5325943	0.625200199	0.182330121	3.428946333	0.000605929	3.22E+00	0.006668267
SPG20	1060.578772	-0.308438673	0.08998285	-3.427749537	0.000608607	3.22E+00	0.006693994
NCBP1	1256.638248	-0.185397382	0.05412795	-3.425169084	0.000614417	3.21E+00	0.006754131
LYG2	0.429256176	-1.153568572	0.336828657	-3.424793436	0.000615267	3.21E+00	0.006759706
GLIS3	200.6084257	-0.468929372	0.136928365	-3.424632807	0.000615631	3.21E+00	0.006759936
STIM1	1608.188074	0.256510442	0.074923578	3.423627779	0.000617912	3.21E+00	0.006781205
C1orf97	187.997854	-0.317671524	0.092800878	-3.423152127	0.000618994	3.21E+00	0.006789303
CLIC2	275.1628339	0.376535968	0.110024143	3.422303121	0.00062093	3.21E+00	0.006806752
FGD5	641.6709423	-0.436065135	0.127431249	-3.42196392	0.000621706	3.21E+00	0.006807677
PREX2	71.18602832	0.598554353	0.174911936	3.422032626	0.000621549	3.21E+00	0.006807677
CD99	2300.588441	-0.345626944	0.101017498	-3.421456193	0.000622868	3.21E+00	0.006816613
UCHL3	413.3043089	-0.285731069	0.083573235	-3.418930325	0.000628678	3.2E+00	0.006876386
C6orf115	863.8746892	-0.382685101	0.111948233	-3.418411278	0.000629878	3.2E+00	0.006885693
SPRY1	705.698746	0.383559581	0.112262936	3.416618107	0.000634042	3.2E+00	0.006927361
CNN3	4546.223504	-0.328264144	0.096089719	-3.416225457	0.000634957	3.2E+00	0.006929675
FOSL2	1801.210449	-0.289207197	0.084655228	-3.41629457	0.000634795	3.2E+00	0.006929675
CD55	1971.593649	-0.37441091	0.109612131	-3.415779877	0.000635996	3.2E+00	0.006933345
GTF2IP1	6664.854033	0.21328736	0.062439138	3.415924146	0.00063566	3.2E+00	0.006933345
RPL9	1245.14021	0.638517438	0.187054265	3.413541189	0.000641245	3.19E+00	0.006986695
BARX2	448.0700212	0.65735014	0.192599962	3.413033594	0.00064244	3.19E+00	0.006995855
GADD45A	445.4702142	-0.342666427	0.100430392	-3.411979397	0.00064493	3.19E+00	0.007019088
NANOS1	260.5176014	-0.389043149	0.114030429	-3.411748519	0.000645476	3.19E+00	0.007021158
POFUT1	2287.00402	0.182392453	0.05347886	3.410552359	0.000648314	3.19E+00	0.007048139
TAPT1	900.8066861	0.310794407	0.091134745	3.410273499	0.000648978	3.19E+00	0.00705146
SNAPC1	202.5696235	-0.201294062	0.059035698	-3.409700742	0.000650342	3.19E+00	0.007060442
GLI1	25.12361368	0.575315641	0.16873278	3.409625803	0.000650521	3.19E+00	0.007060442
SPP1	6438.480898	-0.652064047	0.191259681	-3.409312637	0.000651268	3.19E+00	0.007061885
SYNGR1	672.4641319	0.396399599	0.116271114	3.409269803	0.00065137	3.19E+00	0.007061885
RIOK2	620.2710846	-0.17419379	0.05110853	-3.40831147	0.000653662	3.18E+00	0.00708284
IGJ	3672.000359	0.785453727	0.230468705	3.408071078	0.000654239	3.18E+00	0.007085187
STK11IP	399.992884	-0.196927457	0.057789387	-3.407675142	0.000655188	3.18E+00	0.007091579
TMOD2	361.6953975	0.373269189	0.109547969	3.407358357	0.000655949	3.18E+00	0.007092026
RHOF	180.9935373	0.606765433	0.178067476	3.407502846	0.000655602	3.18E+00	0.007092026
CLEC1A	47.80345374	0.344891546	0.10124871	3.406379649	0.000658306	3.18E+00	0.007112077
MTUS2	16.74458169	0.762654863	0.223896148	3.406288457	0.000658526	3.18E+00	0.007112077
PVRIG	58.72662329	0.448958411	0.131848977	3.405095897	0.000661408	3.18E+00	0.007139297
BMP2	39.98979089	0.562426716	0.1652139	3.404233645	0.0006635	3.18E+00	0.007157953
BMPER	17.33182194	0.685157363	0.201285401	3.403909862	0.000664287	3.18E+00	0.007162522
APEX2	765.1731094	-0.208345477	0.06121222	-3.403658247	0.000664899	3.18E+00	0.007165203
C3orf21	399.8938059	0.24497999	0.071989319	3.403004695	0.000666491	3.18E+00	0.007174519
PCDHGB4	74.61366516	0.742492324	0.218180449	3.403111172	0.000666232	3.18E+00	0.007174519
WSB2	1843.591804	-0.201501747	0.059220337	-3.402576852	0.000667536	3.18E+00	0.00718184
ALPK3	174.9941467	-0.335415823	0.098581747	-3.402413056	0.000667936	3.18E+00	0.007182225
SLC6A1	28.51359944	-0.417964953	0.122861235	-3.401927005	0.000669125	3.17E+00	0.007191088
TPSG1	39.91197285	1.136355961	0.334051965	3.401734101	0.000669598	3.17E+00	0.007192244
CD52	392.8309291	0.576708667	0.169563717	3.401132488	0.000671073	3.17E+00	0.007204166
SAA2	195.3972061	0.908596982	0.267207706	3.400339742	0.000673022	3.17E+00	0.007221153
ACHE	28.1961855	0.654647598	0.192619294	3.398660556	0.000677167	3.17E+00	0.007261677
EPHA2	304.4156765	-0.397448323	0.116949071	-3.398473537	0.00067763	3.17E+00	0.007262692
EPHX3	19.93489274	0.768224593	0.226075464	3.398089205	0.000678583	3.17E+00	0.007268203
C6	34.32846472	0.998461668	0.293840749	3.3979687	0.000678882	3.17E+00	0.007268203
DGKE	299.6874177	0.403476062	0.11877478	3.396984301	0.000681329	3.17E+00	0.00729044
CD160	13.67729484	0.386013728	0.113640273	3.396803933	0.000681778	3.17E+00	0.007291288
ADAMTSL2	165.4807417	-0.427676406	0.125930959	-3.39611807	0.000683489	3.17E+00	0.007302827
ECSCR	75.11230174	0.369016338	0.108659676	3.396074336	0.000683598	3.17E+00	0.007302827
KLC3	122.6440258	0.476409975	0.140315674	3.395272674	0.000685603	3.16E+00	0.007320277
AGBL3	5.687240817	-0.44743373	0.13179658	-3.394881197	0.000686584	3.16E+00	0.007322818
C6orf15	13.99033841	1.103620833	0.325071557	3.395008918	0.000686264	3.16E+00	0.007322818
GGA3	783.8533097	0.197726733	0.058249808	3.394461569	0.000687637	3.16E+00	0.007330083
MST1P9	13.42657915	0.63278445	0.186460703	3.393661175	0.00068965	3.16E+00	0.007347564
STARD4	57.30975023	-0.369820016	0.109032795	-3.391823678	0.000694291	3.16E+00	0.007389031
RSBN1	661.0691372	0.193292342	0.056987736	3.391823501	0.000694291	3.16E+00	0.007389031
NPY	1.671302663	3.02084074	0.890786613	3.391205813	0.000695858	3.16E+00	0.007401709
ZNF114	11.89498121	-0.63378561	0.186940651	-3.390303853	0.000698152	3.16E+00	0.007422101
C17orf104	18.44423637	0.529662272	0.156249983	3.389838917	0.000699337	3.16E+00	0.007430692
ZNF366	34.55194916	0.452990954	0.13370925	3.387880442	0.00070435	3.15E+00	0.007475892
KLB	38.01613374	0.576796321	0.170249908	3.387939108	0.000704199	3.15E+00	0.007475892
IL3RA	133.3286623	0.37172602	0.109736509	3.387441626	0.000705477	3.15E+00	0.007483831
THPO	54.84435573	-0.72205709	0.213184376	-3.387007538	0.000706594	3.15E+00	0.00749165
THSD7A	61.44768303	0.485545038	0.143386159	3.386275509	0.000708482	3.15E+00	0.007507625
HESRG	0.511651101	-1.765685403	0.521550828	-3.385452206	0.000710611	3.15E+00	0.007526013
MGC42105	13.46861321	0.717552268	0.211960626	3.385309252	0.000710981	3.15E+00	0.007526013
TRPC4AP	2483.766946	0.194405729	0.057436086	3.384731473	0.000712479	3.15E+00	0.007537823
ADORA2B	61.61362666	-0.573162186	0.169397923	-3.383525465	0.000715616	3.15E+00	0.007566945
UBE2I	2327.628505	-0.179715603	0.053133157	-3.382362588	0.000718652	3.14E+00	0.007594979
CYP4F3	20.86893272	1.138275453	0.336606003	3.381625534	0.000720583	3.14E+00	0.007611303
STX3	1073.943595	-0.226640518	0.06703192	-3.381083458	0.000722006	3.14E+00	0.00762225
PHC1	491.3875506	0.235173349	0.069562556	3.38074624	0.000722893	3.14E+00	0.007627524
TMEM169	23.64575806	-0.39896991	0.118035503	-3.380083953	0.000724637	3.14E+00	0.007641837
DDIT4L	64.62441074	0.683904883	0.202356461	3.379703708	0.00072564	3.14E+00	0.007648324
FBXO17	170.1860006	0.500060536	0.148062969	3.377350453	0.000731877	3.14E+00	0.007708135
C6orf123	5.918942552	0.714076887	0.211436251	3.377268008	0.000732097	3.14E+00	0.007708135
APCDD1L	80.72602319	0.724118701	0.214421926	3.377073958	0.000732613	3.14E+00	0.007709456
OOEP	1.069718844	1.85006176	0.547902091	3.376628399	0.000733801	3.13E+00	0.007717834
PGAM4	62.86181948	-0.235122679	0.069645217	-3.376006141	0.000735463	3.13E+00	0.007731185
CCDC58	233.1057207	-0.245748055	0.07281718	-3.374863669	0.000738523	3.13E+00	0.00775408
KCNIP4	19.13181932	0.310406774	0.091979123	3.374752495	0.000738821	3.13E+00	0.00775408
ZBTB32	7.974735214	0.54034311	0.160109921	3.374825905	0.000738624	3.13E+00	0.00775408
MBOAT4	2.18800881	-0.447565652	0.1326453	-3.374153878	0.00074043	3.13E+00	0.007766827
CASKIN1	42.95665927	0.611215004	0.181239038	3.372424678	0.000745095	3.13E+00	0.007811604
ITGA5	2371.359063	-0.29200032	0.086594241	-3.37205242	0.000746102	3.13E+00	0.007813857
KIAA0319L	2834.830732	0.258718331	0.076724262	3.372053699	0.000746099	3.13E+00	0.007813857
HIST2H2BF	108.2320202	-0.499634298	0.148202008	-3.371305853	0.000748127	3.13E+00	0.007830904
NANOG	1.436499672	-0.804278327	0.238608798	-3.37069854	0.000749779	3.13E+00	0.00783986
CAB39	2232.320205	-0.168186938	0.049896097	-3.370743378	0.000749657	3.13E+00	0.00783986
TPM1	6104.148576	-0.300707117	0.089222673	-3.370299336	0.000750866	3.12E+00	0.007847064
DNAH6	29.04180937	-0.627283076	0.186199605	-3.368874371	0.000754758	3.12E+00	0.007883564
HIPK4	3.922417437	0.508544572	0.150980638	3.368276754	0.000756396	3.12E+00	0.007896489
FRAS1	204.1180143	0.689222983	0.204699377	3.367000877	0.000759904	3.12E+00	0.007928913
PAM	3408.523363	-0.390975669	0.116130688	-3.36668692	0.00076077	3.12E+00	0.007933745
MRPS25	676.8159318	-0.220949711	0.065638832	-3.366143252	0.000762271	3.12E+00	0.007940996
ZDHHC13	551.8259427	0.285078393	0.08468785	3.366225396	0.000762044	3.12E+00	0.007940996
LYPD1	70.85082821	-0.51692988	0.153591628	-3.365612349	0.00076374	3.12E+00	0.007947892
BAALC	69.72670115	0.618153589	0.183661835	3.365716062	0.000763453	3.12E+00	0.007947892
GVIN1	127.4424416	0.568420455	0.168902228	3.365381637	0.000764379	3.12E+00	0.007950344
PDLIM5	4078.69545	-0.358111447	0.106424044	-3.364948693	0.000765579	3.12E+00	0.007958629
HPCAL4	4.800476629	0.655821035	0.194935015	3.364305977	0.000767364	3.11E+00	0.007972983
PRIC285	1309.366647	0.381503814	0.113426727	3.363438455	0.00076978	3.11E+00	0.007993869
LINGO1	458.7542137	0.637688257	0.189649713	3.362453047	0.000772533	3.11E+00	0.00801823
LTBP4	729.1610269	0.335175445	0.099693686	3.36205288	0.000773653	3.11E+00	0.008025633
ZNF639	715.7799531	0.262149823	0.077980488	3.361736102	0.000774541	3.11E+00	0.008030618
CEND1	3.178282026	0.589070578	0.175412872	3.358194699	0.000784533	3.11E+00	0.008129943
ANKMY2	442.5499896	-0.231098939	0.068832385	-3.357415815	0.000786747	3.1E+00	0.008147661
ZNF549	243.4819072	0.326394702	0.097219334	3.357302388	0.00078707	3.1E+00	0.008147661
RARB	148.8785602	0.443809197	0.132199538	3.357116092	0.0007876	3.1E+00	0.008148873
CHRDL1	346.4447043	0.766897644	0.228487762	3.356405776	0.000789626	3.1E+00	0.008165547
MS4A15	75.86655815	1.078248934	0.321321441	3.355670662	0.000791728	3.1E+00	0.008182987
ALDH1A2	47.87449987	0.654969882	0.195206874	3.355260335	0.000792903	3.1E+00	0.00819084
DDR1	7662.324964	0.269159437	0.080332909	3.350550105	0.000806512	3.09E+00	0.008327059
DCBLD1	356.4643415	-0.331944848	0.099114913	-3.349090842	0.000810772	3.09E+00	0.008366658
ZNF620	60.32812512	0.306111295	0.091413685	3.348637528	0.0008121	3.09E+00	0.008375973
ORAI1	418.1052412	0.271948715	0.081229011	3.347925973	0.000814188	3.09E+00	0.008388728
RAPGEFL1	452.2844286	0.609897067	0.182166012	3.348028871	0.000813885	3.09E+00	0.008388728
MIF4GD	529.9102672	0.258377755	0.077186454	3.347449475	0.000815589	3.09E+00	0.008398772
ZDHHC4	834.5583548	0.22928917	0.068522353	3.34619522	0.000819287	3.09E+00	0.008430359
MYO7A	150.931887	0.573594561	0.171420833	3.346119308	0.000819511	3.09E+00	0.008430359
C11orf2	1289.225573	0.250532283	0.074880045	3.345781691	0.00082051	3.09E+00	0.008434955
CNR2	5.002256475	0.987456082	0.295143713	3.345678855	0.000820814	3.09E+00	0.008434955
XG	96.80069328	-0.493593534	0.147559658	-3.34504389	0.000822696	3.08E+00	0.008446754
GCHFR	186.4653083	-0.390974643	0.116883226	-3.345002158	0.000822819	3.08E+00	0.008446754
PGM2L1	618.546511	-0.392177316	0.117291085	-3.343624262	0.000826917	3.08E+00	0.008484396
KCNA6	22.99765339	0.626511863	0.187393451	3.343296463	0.000827894	3.08E+00	0.008490006
NT5C	290.8546199	0.301385431	0.090154392	3.342992198	0.000828802	3.08E+00	0.0084949
NOX4	226.8875372	-0.413104523	0.123579207	-3.342831951	0.000829281	3.08E+00	0.008495389
C20orf160	61.57974551	0.333211395	0.099708408	3.341858546	0.000832195	3.08E+00	0.008520808
DYNLL1	3957.693132	-0.185638973	0.05556392	-3.34099849	0.000834777	3.08E+00	0.008538961
CYP20A1	600.8079675	-0.174087104	0.052106607	-3.340979465	0.000834834	3.08E+00	0.008538961
BRDT	8.341245384	1.363853068	0.408321228	3.340147347	0.00083734	3.08E+00	0.008560146
ISLR2	34.68337894	0.442848322	0.132609831	3.33948334	0.000839344	3.08E+00	0.008571745
HPCA	6.825389316	0.611330758	0.183056215	3.339579362	0.000839054	3.08E+00	0.008571745
C8orf46	39.01199446	0.75556178	0.226264493	3.339285673	0.000839941	3.08E+00	0.008573405
ZNF132	87.40282153	0.333578593	0.099901622	3.339070832	0.000840591	3.08E+00	0.008575597
CD1A	36.87877922	-0.982269128	0.294210147	-3.33866503	0.00084182	3.07E+00	0.008583691
RFX8	10.16067945	-0.479679396	0.143686695	-3.338370314	0.000842714	3.07E+00	0.008588358
PNMAL2	54.23163356	0.441300187	0.132286802	3.335935101	0.00085013	3.07E+00	0.008659464
DDX1	2702.676732	-0.154182778	0.046222087	-3.335694825	0.000850865	3.07E+00	0.008662475
NELF	843.3533951	0.270336486	0.081075086	3.334396528	0.000854847	3.07E+00	0.00869852
IFT46	692.6873329	-0.287797972	0.086327491	-3.33379284	0.000856704	3.07E+00	0.008708429
LRRFIP1	3784.27426	-0.205347773	0.061594194	-3.333881973	0.00085643	3.07E+00	0.008708429
FAM162A	1144.014428	-0.307457876	0.092241976	-3.333166641	0.000858635	3.07E+00	0.008723554
KIAA1429	3036.754177	0.277035476	0.083129199	3.332589249	0.000860419	3.07E+00	0.00872831
TIFAB	13.56236929	0.753961457	0.226239222	3.332585084	0.000860432	3.07E+00	0.00872831
KRT23	1340.06924	0.857736792	0.257373547	3.33265327	0.000860221	3.07E+00	0.00872831
RSPRY1	495.8687952	-0.220200094	0.066086904	-3.331977781	0.000862311	3.06E+00	0.008738384
PPM1D	457.7567513	0.315775337	0.094768563	3.332068441	0.000862031	3.06E+00	0.008738384
SDHAF1	198.5018095	0.233540134	0.070123485	3.330412543	0.000867174	3.06E+00	0.008778634
ZNF154	48.61792118	0.479261236	0.143899981	3.330516336	0.000866851	3.06E+00	0.008778634
LOC144571	28.43662932	0.324268686	0.09738042	3.329916701	0.00086872	3.06E+00	0.008789766
FSIP1	414.2722704	0.777794811	0.233677698	3.328493977	0.000873169	3.06E+00	0.008830251
HIST4H4	44.16066192	0.558452941	0.16779471	3.328191579	0.000874117	3.06E+00	0.008835309
OGFRL1	629.8871202	0.415856246	0.124980365	3.327372638	0.000876691	3.06E+00	0.008856776
BMF	617.4392961	0.295317586	0.088777086	3.326506866	0.000879419	3.06E+00	0.008879784
CLDN19	14.43122265	1.007581956	0.303004392	3.32530479	0.000883219	3.05E+00	0.008913595
CDH19	16.88769141	1.79510651	0.540143095	3.323390646	0.000889303	3.05E+00	0.008970398
FAM48A	960.6746847	-0.256561488	0.077213986	-3.322733371	0.000891401	3.05E+00	0.008986961
EZH1	698.5607436	0.226856109	0.06834471	3.319292864	0.000902457	3.04E+00	0.00909378
GM2A	2541.440358	-0.240612134	0.072522412	-3.31776245	0.000907416	3.04E+00	0.009136945
GPR146	88.21187237	0.34188926	0.103050551	3.317684923	0.000907668	3.04E+00	0.009136945
CYTSA	1806.214372	0.223046361	0.06724387	3.316976839	0.000909972	3.04E+00	0.009154151
BCAN	21.63211422	0.778811804	0.234803512	3.316866084	0.000910332	3.04E+00	0.009154151
GABRA1	1.492852701	2.215376596	0.667939666	3.316731598	0.000910771	3.04E+00	0.009154151
RAC3	331.1433815	0.413790101	0.124774003	3.316316633	0.000912124	3.04E+00	0.009163083
UBA5	880.0092435	-0.175087184	0.052818969	-3.314854245	0.000916909	3.04E+00	0.009202165
C20orf117	630.8462434	0.295397389	0.089113557	3.314842317	0.000916948	3.04E+00	0.009202165
GTF2E2	600.2413023	-0.242643224	0.073203149	-3.314655527	0.000917561	3.04E+00	0.009203629
RALYL	2.115048915	2.303880777	0.69519339	3.314014216	0.000919668	3.04E+00	0.009220072
SLC9A8	675.9064496	0.281255456	0.084895823	3.312948123	0.000923181	3.03E+00	0.009250584
S100A5	1.056423111	-0.737051469	0.222492905	-3.312696508	0.000924012	3.03E+00	0.009251945
FLJ39739	4.560822264	-0.630909096	0.190456067	-3.31262272	0.000924256	3.03E+00	0.009251945
LRBA	4011.563926	0.317740148	0.095933319	3.312093754	0.000926005	3.03E+00	0.009258924
FAM184A	79.03417409	0.524822776	0.158455099	3.312122984	0.000925908	3.03E+00	0.009258924
GNG4	206.4758313	0.919692554	0.277686133	3.311985887	0.000926362	3.03E+00	0.009258924
C12orf53	15.48751773	0.669367611	0.202159199	3.311091533	0.000929328	3.03E+00	0.00928386
PTGIS	508.1702115	0.485707026	0.146709735	3.310666636	0.00093074	3.03E+00	0.0092842
RSPO3	72.78235966	0.530587785	0.160272709	3.310531082	0.000931191	3.03E+00	0.0092842
FAM57B	35.28912119	0.774024089	0.233807792	3.310514521	0.000931246	3.03E+00	0.0092842
LGR6	178.9353055	0.850024402	0.25674897	3.310721761	0.000930557	3.03E+00	0.0092842
RAVER2	444.0347317	0.378663547	0.114406987	3.309793884	0.000933647	3.03E+00	0.009303429
NLRP11	1.071720711	1.518946215	0.45902076	3.309101347	0.00093596	3.03E+00	0.009319555
LALBA	117.9217523	5.07710169	1.534319004	3.309026139	0.000936211	3.03E+00	0.009319555
ABCC6P1	4.095349638	-0.882711067	0.266857735	-3.307796445	0.000940331	3.03E+00	0.009355846
BCL11A	146.528995	0.87062729	0.26323628	3.30739854	0.000941668	3.03E+00	0.00936442
RNF175	11.60253477	0.504593867	0.152624027	3.306123395	0.000945964	3.02E+00	0.009402397
TBCD	1909.122889	0.257468481	0.077885157	3.305745173	0.000947242	3.02E+00	0.009410352
ACTA1	54.55801231	0.903836597	0.273440604	3.305422028	0.000948335	3.02E+00	0.009416464
CHIC2	205.6992537	0.214281098	0.064829973	3.305278232	0.000948822	3.02E+00	0.009416553
CACNA2D2	432.9833358	0.660128441	0.199731737	3.305075362	0.000949509	3.02E+00	0.009418629
CTSF	1694.11124	0.357776777	0.108266705	3.304587284	0.000951164	3.02E+00	0.009430298
ENOPH1	1145.464688	0.20821629	0.063026269	3.303642976	0.000954373	3.02E+00	0.009455036
NAGS	74.7739234	0.515279201	0.155976429	3.303570966	0.000954618	3.02E+00	0.009455036
ZNF512B	858.3777124	0.259930717	0.078712343	3.302286644	0.000959	3.02E+00	0.009493668
ARHGEF6	1313.892353	0.40781946	0.123507645	3.301977465	0.000960058	3.02E+00	0.009499367
CLEC14A	380.2165867	0.325249693	0.098506611	3.301805726	0.000960646	3.02E+00	0.009500416
IL17REL	11.30570194	0.83097855	0.251687942	3.301622412	0.000961274	3.02E+00	0.009501859
DSE	795.1623932	-0.293535138	0.088937662	-3.300459347	0.000965267	3.02E+00	0.009527505
C16orf57	804.8563165	-0.272500678	0.082568359	-3.300303892	0.000965802	3.02E+00	0.009527505
PROS1	496.5908746	0.378958631	0.114822029	3.300400059	0.000965471	3.02E+00	0.009527505
S100G	7.761368423	3.092000738	0.936818968	3.300531741	0.000965018	3.02E+00	0.009527505
DCK	717.74	0.226199533	0.068548588	3.299842328	0.000967392	3.01E+00	0.009538414
[truncated: 999 more rows]
